# Supplementary material for: Resolution of aryl-H-phosphinates applied in the synthesis of P-stereogenic compounds including a Brønsted acid NMR solvating agent
Source: Royal Society of Chemistry journal article supplement (doi:10.1039/d2qo00241h), 2022-01-01
Supplement: d2qo00241h1.pdf [file d2qo00241h1.pdf]

## Supporting Information

### Resolution of aryl-*H*-phosphinates applied in the synthesis of P-stereogenic compounds including a Brønsted acid NMR solvating agent

Bence Varga,<sup>a,\*</sup> Daniella Vincze,<sup>a</sup> Hajnalka Pető,<sup>a</sup> Levente Buna,<sup>a</sup> János Pauló,<sup>a</sup> Tamás Holczbauer,<sup>b</sup> Béla Mátravölgyi,<sup>a</sup> László Hegedűs,<sup>a</sup> Elemér Fogassy,<sup>a</sup> György Keglevich,<sup>a</sup>  
Péter Bagi<sup>a,\*</sup>

<sup>a</sup> Department of Organic Chemistry and Technology, Budapest University of Technology and Economics, Műegyetem rkp. 3., H-1111 Budapest, Hungary

<sup>b</sup> Chemical Crystallography Research Laboratory and Institute of Organic Chemistry, Research Centre for Natural Sciences, Magyar tudósok körútja 2., H-1519 Budapest, Hungary

\* Corresponding authors. Tel.: +36 1 4631111/5886; fax: +36 1 4633648. Email addresses: bencevarga@edu.bme.hu and bagi.peter@vbk.bme.hu

### Table of Contents

|                                                                                                                                                                                          |     |
|------------------------------------------------------------------------------------------------------------------------------------------------------------------------------------------|-----|
| General methods (instruments) .....                                                                                                                                                      | S2  |
| Preparation of racemic H-phosphinates ( <b>1a-p</b> ) and TADDOL-derivatives [( <i>R,R</i> )- <b>2d</b> and ( <i>R,R</i> )- <b>2f</b> ] .....                                            | S4  |
| Representative resolution procedures and data .....                                                                                                                                      | S13 |
| Gram-scale resolution of 1-adamantyl phenyl- <i>H</i> -phosphinate ( <b>1a</b> ) with 1-naphthyl-spiro-TADDOL [( <i>R,R</i> )- <b>2e</b> ] .....                                         | S21 |
| Recrystallization of enantiomeric mixtures of ( <i>R</i> )-1-adamantyl phenyl- <i>H</i> -phosphinate [( <i>R</i> )- <b>1a</b> ] .....                                                    | S21 |
| Decomposition of the diastereomeric complex ( <i>R</i> )- <b>1a</b> ·( <i>R,R</i> )- <b>2e</b> .....                                                                                     | S23 |
| Complete procedure for the preparation of ( <i>R</i> )- and ( <i>S</i> )-1-adamantyl phenyl- <i>H</i> -phosphinate [( <i>R</i> )- <b>1a</b> and ( <i>S</i> )- <b>1a</b> ] .....          | S24 |
| Racemization studies of enantiopure alkyl phenyl- <i>H</i> -phosphinates [( <i>R</i> )- <b>1a</b> , ( <i>R</i> )- <b>1b</b> , ( <i>R</i> )- <b>1d</b> or ( <i>R</i> )- <b>1j</b> ] ..... | S25 |
| Stereospecific transformations of ( <i>R</i> )-1-admantyl phenyl- <i>H</i> -phosphinate [( <i>R</i> )- <b>1a</b> ] .....                                                                 | S26 |
| Application of ( <i>S</i> )-1-adamantyl-phenylphosphonothioic acid [( <i>S</i> )- <b>3f</b> ] as NMR chiral solvating agent .....                                                        | S30 |
| X-ray measurements .....                                                                                                                                                                 | S33 |
| <sup>31</sup> P, <sup>19</sup> F, <sup>1</sup> H and <sup>13</sup> C NMR spectra of the compounds prepared .....                                                                         | S45 |
| HPLC traces of the optically active compounds .....                                                                                                                                      | S95 |

## 1. General methods (instruments)

The (*S*)-alanine, 2-amino-1-phenylethanol (**8**), 2-amino-1-phenylpropan-1-ol (**7**), 2-amino-3-phenylpropan-1-ol (**10**), benzyl alcohol, (*S*)-1,1'-bi(2-naphthol), (*1S*)-3-bromocamphor-10-sulfonic acid, (*1S*)-10-camphorsulphonic acid, carbon tetrachloride, (*R*)-2-chloromandelic acid, (+)-cinchonine, *c*-heptanol, *c*-hexanol, *O,O'*-dibenzoyl-(*R,R*)-tartaric acid, *O,O'*-di-(4-toluoyl)-(*R,R*)-tartaric acid, iodomethane, (*1R,2S,5R*)-2-isopropyl-5-methyl-*c*-hexanol, methyl-*c*-hexanol, 1-naphthylethylamine (**6**), *n*-butyllithium solution (2.5 M in hexane), (*R*)-phencyphos hydrate, (*S*)-phenylalanine, (*S*)-1-phenylethylamine, (*S*)- $\alpha$ -phenylglycine, phenylglycinol (**9**), phenyl-*H*-phosphinic acid (**4**), sodium hydride, sulfur, (*R,R*)-tartric acid and *t*-butanol were purchased from Merck Chemicals Ltd. The 2-adamantanol, 4-bromoanisole, 4-bromobenzotrifluoride, 1-bromonaphthalene, 2-bromonaphthalene, 2-bromotoluene, 3-bromotoluene, 4-bromotoluene, *c*-pentanol, 2,4-dimethyl-3-pentanol, *N*-(3-dimethylaminopropyl)-*N'*-ethylcarbodiimide hydrochloride (EDC·HCl) and 2,4,6-triisopropylbenzenesulfonyl chloride were purchased from Fluorochem Ltd. The 1-adamantanol and *t*-butylmagnesium chloride solution (2M in THF) were purchased from Tokyo Chemical Industry Ltd. The 5% Rh/C catalyst was purchased from Alfa Aesar - Thermo Fisher Scientific Inc.

The calcium hydrogen *O,O'*-dibenzoyl-(*R,R*)-tartrate, calcium hydrogen *O,O'*-di-(4-toluoyl)-(*R,R*)-tartrate,<sup>1,2</sup> diethyl (2*R,3R*)-1,4-dioxaspiro[4.5]decane-2,3-dicarboxylate, ((4*R,5R*)-2,2-dimethyl-1,3-dioxolane-4,5-diyl)bis(diphenylmethanol) [(*R,R*)-**2a**], ((2*R,3R*)-1,4-dioxaspiro[4.5]decane-2,3-diyl)bis(diphenylmethanol) [(*R,R*)-**2b**],<sup>3</sup> ((2*R,3R*)-1,4-dioxaspiro[4.5]decane-2,3-diyl)bis(bis(4-(*tert*-butyl)phenyl)methanol) [(*R,R*)-**2c**],<sup>4</sup> ((2*R,3R*)-1,4-dioxaspiro[4.5]decane-2,3-diyl)bis(di(naphthalen-1-yl)methanol) [(*R,R*)-**2e**],<sup>3</sup> ((2*R,3R,10R,11R*)-1,4,9,12-tetraoxadispiro[4.2.4<sup>8</sup>.2<sup>5</sup>]tetradecane-2,3,10,11-tetrayl)tetrakis(diphenylmethanol) [(*R,R*)-**2g**],<sup>5</sup> dichloro-adamantyloxyphosphine (**5**),<sup>6</sup> *t*-butylphenylphosphine oxide (**11**), *c*-hexyl-phenylphosphine-oxide (**12**) and butyl-phenylphosphine-oxide (**13**)<sup>7</sup> were synthesized as described in the literature, and their analytical data were identical to the ones reported.

The solvents were purchased from Merck Chemicals Ltd., and they were purified according to the standard procedures.<sup>8</sup> Dry solvents were stored over 3Å or 4Å molecular sieves.

The  $^{31}\text{P}$ ,  $^{19}\text{F}$ ,  $^{13}\text{C}$ ,  $^1\text{H}$  NMR spectra were taken on a Bruker AV-300 or DRX-500 spectrometer operating at 121.5, 282.4, 75.5 and 300 or 202.5, 470.6, 125.8 and 500 MHz, respectively. The chemical shifts ( $\delta$ ) are given in parts per million (ppm). The chemical shifts ( $\delta$ ) for  $^1\text{H}$  and  $^{13}\text{C}$  in  $\text{CDCl}_3$  and referenced to 7.26 and 77.16 ppm, respectively. 85% Solution of  $\text{H}_3\text{PO}_4$  was the external reference for  $^{31}\text{P}$  NMR chemical shifts. Coupling constants are expressed in Hertz (Hz). The following abbreviations are used: s = singlet, bs = broad singlet, d = doublet, t = triplet, q = quadruplet, m = multiplet, dd = doublet of doublets, dt = doublet of triplets.

The exact mass measurements were performed using an Agilent 6230C TOF LCMS System with Agilent Jet Stream source in positive ESI mode (Buffer: ammonium-formate in water / acetonitrile; Drying gas: 325 °C; Capillary: 3000 V; Fragmentor 100 V).

LCMS measurements were performed using an Agilent 1100 and Agilent 6130 LCMS system in positive and negative electrospray mode.

The stainless steel autoclave was a product of Technoclave Inc (Hungary).

Melting points were obtained on a melting point apparatus and are uncorrected.

Thin layer chromatography (TLC) was performed on Merck pre-coated Silica gel 60 F<sub>254</sub> aluminium plates with realization by UV irradiation.

Column chromatography was performed on Silica gel 60 with a particle size of 0.063-0.200 mm supplied by Merck. Flash column chromatography was performed using a Combi-Flash® (Teledyne ISCO) using gradient elution in normal (Silica gel column; hexane–ethyl acetate).

The syntheses involving organometallic reagents were carried out under a nitrogen atmosphere in *Schlenk*-type reaction vessels.<sup>9</sup>

The enantiomeric excess (*ee*) values of compounds **1a-o** and **3a-d** were determined by chiral HPLC on a Perkin Elmer Series 200 instrument using normal phase mode equipped with Kromasil® 5-Amycoat, Phenomenex Lux ® 5 $\mu\text{m}$  Amylose-2, Phenomenex Lux ® 5 $\mu\text{m}$  Cellulose-1, Phenomenex Lux ® 5 $\mu\text{m}$  Cellulose-2 or Phenomenex Lux ® 3 $\mu\text{m}$  Cellulose-4 columns. All columns had the dimensions of 250  $\times$  4.6 mm. A mixture of hexane-ethanol was used as the eluent with a flow rate of 0.8 mL/min ( $T = 20^\circ\text{C}$ , UV detector  $\alpha = 254$  nm). The exact chromatographic parameters of the normal phase chiral HPLC are detailed in Table S12. The enantiomeric excess (*ee*) values of **3f** were determined by  $^{31}\text{P}$  NMR using 6.2 mg (20  $\mu\text{mol}$ ) of the analyte, 3.9  $\mu\text{L}$  (30  $\mu\text{mol}$ ) (*S*)-1-phenylethylamine as CSA and 750  $\mu\text{L}$   $\text{CDCl}_3$  as solvent. Optical rotations were determined on a Perkin–Elmer 341 polarimeter.

For the single crystal structure determination, the intensity data were collected on a Rigaku RAXIS-RAPID II diffractometer (using graphite monochromator; Mo-K $\alpha$  radiation,  $\lambda = 0.71075\text{\AA}$ ) in case of crystals. The crystals were measured with fiber. Crystal Clear (developed

by Rigaku Company) software were used for data collection and refinement.<sup>10</sup> Numerical and empirical absorption corrections were applied to the data.<sup>11</sup> The structures were solved by direct methods. Anisotropic full-matrix least-squares refinements were performed on F<sup>2</sup> for all non-hydrogen atoms. Hydrogen atoms bonded to C atoms were placed in calculated positions and refined in a riding-model approximation. The computer programs used for the structure solution, refinement and analysis of the structures were Shelx,<sup>12,13</sup> Sir2014,<sup>14</sup> Wingx,<sup>15</sup> Platon,<sup>16-18</sup> and Crystal Explorer.<sup>19-21</sup> Details of crystallographic data, data collection and refinement for the crystals are collected in Table S11.

## 2. Preparation of racemic *H*-phosphinates (**1a-p**) and TADDOL-derivatives [(*R,R*)-**2d** and (*R,R*)-**2f**]

### 2.1. Preparation of phenyl-*H*-phosphinates (**1a-j**)

#### 2.1.1. Preparation of 1-adamantyl phenyl-*H*-phosphinate (**1a**) (Representative procedure I.)

The phenyl-*H*-phosphinates (**1a-j**) were synthesized by a modified procedure of *Morales et al.*<sup>22</sup>

To a solution of 8.0 g (56.3 mmol) of phenyl-*H*-phosphinic acid (**4**) and 8.6 g (56.3 mmol) of 1-adamantanol in 160 mL of anhydrous DCM, 21.6 g (113 mmol) of EDC·HCl was added in 10 portions over 30 min under nitrogen atmosphere at 25°C. The resulting solution was stirred at this temperature for an additional 2 hours. Then, it was washed with 2 M HCl solution (2 × 160 mL), and the aqueous phases were combined and extracted with DCM (3 × 160 mL). The organic layers were combined, dried (Na<sub>2</sub>SO<sub>4</sub>) and evaporated. The crude product was purified by flash column chromatography (silica gel, gradient elution, 100% hexane to 100% EtOAc) to give 12.4 g (80%) of 1-adamantyl phenyl-*H*-phosphinate (**1a**) as a white solid.

mp.: 70-72°C; <sup>31</sup>P{<sup>1</sup>H} NMR (121.5 MHz, CDCl<sub>3</sub>) δ 14.3 (δ<sub>lit</sub> 14.1);<sup>23</sup> <sup>1</sup>H NMR (300 MHz, CDCl<sub>3</sub>) δ 7.80 (d, *J* = 553.6, 1H), 7.82 – 7.74 (m, 2H), 7.59 – 7.45 (m, 3H), 2.22 (bs, 3H), 2.14 (bs, 6H), 1.66 (bs, 6H); <sup>13</sup>C{<sup>1</sup>H} NMR (75.5 MHz, CDCl<sub>3</sub>) δ 132.6 (d, *J* = 3.0), 131.9 (d, *J* = 137.9), 131.0 (d, *J* = 11.6), 128.6 (d, *J* = 13.9), 82.8 (d, *J* = 8.5), 44.3 (d, *J* = 4.7), 35.8, 31.3; HRMS (ESI/TOF) *m/z*: [M + H]<sup>+</sup> Calcd for C<sub>16</sub>H<sub>22</sub>O<sub>2</sub>P 277.1357; Found 277.1354.

### 2.1.2. Preparation of 2-adamantyl phenyl-*H*-phosphinate (**1b**)

The 2-adamantyl phenyl-*H*-phosphinate (**1b**) was prepared according to Representative Procedure I. described in Section 2.1.1. by reacting 1.0 g (7.0 mmol) of phenyl-*H*-phosphinic acid (**4**), 1.1 g (7.0 mmol) of 2-adamantanol and 2.7 g (14.0 mmol) of EDC·HCl in 20 mL of anhydrous DCM. The crude product was purified by flash column chromatography (silica gel, gradient elution, 100% hexane to 100% EtOAc) to give 1.7 g (90%) of 2-adamantyl phenyl-*H*-phosphinate (**1b**) as a dense clear oil.

$^{31}\text{P}\{^1\text{H}\}$  NMR (202.5 MHz,  $\text{CDCl}_3$ )  $\delta$  21.6;  $^1\text{H}$  NMR (500 MHz,  $\text{CDCl}_3$ )  $\delta$  7.83 – 7.78 (m, 2H), 7.68 (d,  $J = 557.2$ , 1H), 7.60 – 7.57 (m, 1H), 7.52 – 7.49 (m, 2H), 4.66 – 4.63 (m, 1H), 2.19 – 2.03 (m, 4H), 1.91 – 1.81 (m, 4H), 1.76 – 1.68 (m, 4H), 1.63 – 1.52 (m, 2H);  $^{13}\text{C}\{^1\text{H}\}$  NMR (125.8 MHz,  $\text{CDCl}_3$ )  $\delta$  133.0 (d,  $J = 2.9$ ), 131.0 (d,  $J = 11.8$ ), 130.9 (d,  $J = 134.2$ ), 128.8 (d,  $J = 13.9$ ), 80.8 (d,  $J = 6.7$ ), 37.4, 36.4, 33.9 (d,  $J = 3.9$ ), 33.5 (d,  $J = 3.6$ ), 31.4, 31.3, 27.3, 27.0, 26.9; HRMS (ESI/TOF)  $m/z$ :  $[\text{M} + \text{H}]^+$  Calcd for  $\text{C}_{16}\text{H}_{22}\text{O}_2\text{P}$  277.1357; Found 277.1353.

### 2.1.3. Preparation of *c*-pentyl phenyl-*H*-phosphinate (**1c**)

The *c*-pentyl phenyl-*H*-phosphinate (**1c**) was prepared according to Representative Procedure I. described in Section 2.1.1. by reacting 1.0 g (7.0 mmol) of phenyl-*H*-phosphinic acid (**4**), 0.64 mL (7.0 mmol) of *c*-pentanol and 2.7 g (14.0 mmol) of EDC·HCl in 20 mL of anhydrous DCM. The crude product was purified by flash column chromatography (silica gel, gradient elution, 100% hexane to hexane – EtOAc 50% : 50%) to give 1.3 g (85%) of *c*-pentyl phenyl-*H*-phosphinate (**1c**) as a clear oil.

$^{31}\text{P}\{^1\text{H}\}$  NMR (202.5 MHz,  $\text{CDCl}_3$ )  $\delta$  22.7;  $^1\text{H}$  NMR (500 MHz,  $\text{CDCl}_3$ )  $\delta$  7.78 – 7.74 (m, 2H), 7.58 (d,  $J = 559.6$ , 1H), 7.59 – 7.56 (m, 1H), 7.49 (td,  $J = 7.58$ , 3.44, 2H), 4.95 – 4.90 (m, 1H), 1.97 – 1.72 (m, 6H), 1.66 – 1.54 (m, 2H);  $^{13}\text{C}\{^1\text{H}\}$  NMR (125.8 MHz,  $\text{CDCl}_3$ )  $\delta$  133.0 (d,  $J = 2.9$ ), 131.0 (d,  $J = 11.7$ ), 130.6 (d,  $J = 133.0$ ), 128.8 (d,  $J = 13.8$ ), 80.0 (d,  $J = 6.8$ ), 34.4 (d,  $J = 4.8$ ), 34.1 (d,  $J = 4.2$ ), 23.2, 23.1; HRMS (ESI/TOF)  $m/z$ :  $[\text{M} + \text{Na}]^+$  Calcd for  $\text{C}_{11}\text{H}_{15}\text{NaO}_2\text{P}$  233.0707; Found 233.0702.

### 2.1.4. Preparation of *c*-hexyl phenyl-*H*-phosphinate (**1d**)

The *c*-hexyl phenyl-*H*-phosphinate (**1d**) was prepared according to Representative Procedure I. described in Section 2.1.1. by reacting 1.0 g (7.0 mmol) of phenyl-*H*-phosphinic acid (**4**), 0.73 mL (7.0 mmol) of *c*-hexanol and 2.7 g (14.0 mmol) of EDC·HCl in 20 mL of anhydrous DCM. The crude product was purified by flash column chromatography (silica gel, gradient elution,

100% hexane to 100% EtOAc) to give 1.5 g (97%) of *c*-hexyl phenyl-*H*-phosphinate (**1d**) as a clear oil.

$^{31}\text{P}\{^1\text{H}\}$  NMR (202.5 MHz,  $\text{CDCl}_3$ )  $\delta$  22.0 ( $\delta_{\text{lit}}$  22.0);<sup>24</sup>  $^1\text{H}$  NMR (500 MHz,  $\text{CDCl}_3$ )  $\delta$  7.80 – 7.76 (m, 2H), 7.63 (d,  $J = 559.0$ , 1H), 7.59 – 7.56 (m, 1H), 7.51 – 7.47 (m, 2H), 4.47 – 4.40 (m, 1H), 2.04 – 1.99 (m, 1H), 1.92 – 1.87 (m, 1H), 1.78 – 1.49 (m, 5H), 1.39 – 1.21 (m, 3H);  $^{13}\text{C}\{^1\text{H}\}$  NMR (125.8 MHz,  $\text{CDCl}_3$ )  $\delta$  133.0 (d,  $J = 3.0$ ), 131.0 (d,  $J = 11.8$ ), 130.8 (d,  $J = 133.4$ ), 128.8 (d,  $J = 13.8$ ), 76.3 (d,  $J = 6.5$ ), 34.0 (d,  $J = 4.2$ ), 33.6 (d,  $J = 3.7$ ), 25.2, 23.7; HRMS (ESI/TOF)  $m/z$ :  $[\text{M} + \text{H}]^+$  Calcd for  $\text{C}_{12}\text{H}_{18}\text{O}_2\text{P}$  225.1044; Found 225.1039.

### 2.1.5. Preparation of (1*R*,2*S*,5*R*)-2-isopropyl-5-methyl-*c*-hexyl phenyl-*H*-phosphinate (**1e**)

The (1*R*,2*S*,5*R*)-2-isopropyl-5-methyl-*c*-hexyl phenyl-*H*-phosphinate (**1e**) was prepared according to Representative Procedure I. described in Section 2.1.1. by reacting 1.0 g (7.0 mmol) of phenyl-*H*-phosphinic acid (**4**), 1.1 g (7.0 mmol) of (1*R*,2*S*,5*R*)-menthol and 2.7 g (14.0 mmol) of EDC·HCl in 20 mL of anhydrous DCM. The crude product was purified by flash column chromatography (silica gel, gradient elution, 100% hexane to hexane – EtOAc 50% : 50%) to give 1.9 g (94%) of (1*R*,2*S*,5*R*)-2-isopropyl-5-methyl-*c*-hexyl phenyl-*H*-phosphinate (**1e**) as a clear oil.

$^{31}\text{P}\{^1\text{H}\}$  NMR (Diastereomer A, 202.5 MHz,  $\text{CDCl}_3$ )  $\delta$  24.6 ( $\delta_{\text{lit}}$  25.2);<sup>25</sup>  $^{31}\text{P}\{^1\text{H}\}$  NMR (Diastereomer B, 202.5 MHz,  $\text{CDCl}_3$ )  $\delta$  21.2 ( $\delta_{\text{lit}}$  21.9);<sup>25</sup>  $^1\text{H}$  NMR (Diastereomer A, 500 MHz,  $\text{CDCl}_3$ )  $\delta$  7.79 – 7.75 (m, 2H, overlap), 7.65 (d,  $J = 552.9$ , 1H), 7.60 – 7.56 (m, 1H, overlap), 7.52 – 7.48 (m, 2H, overlap), 4.31 – 4.21 (m, 1H, overlap), 2.30 – 2.07 (m, 2H, overlap), 1.71 – 1.64 (m, 2H, overlap), 1.51 – 1.36 (m, 2H, overlap), 1.31 – 1.20 (m, 1H, overlap), 1.08 – 0.85 (m, 11H, overlap);  $^1\text{H}$  NMR (Diastereomer B, 500 MHz,  $\text{CDCl}_3$ )  $\delta$  7.79 – 7.75 (m, 2H, overlap), 7.67 (d,  $J = 556.2$ , 1H), 7.60 – 7.56 (m, 1H, overlap), 7.52 – 7.48 (m, 2H, overlap), 4.31 – 4.21 (m, 1H, overlap), 2.30 – 2.07 (m, 2H, overlap), 1.71 – 1.64 (m, 2H, overlap), 1.51 – 1.36 (m, 2H, overlap), 1.31 – 1.20 (m, 1H, overlap), 1.08 – 0.85 (m, 8H, overlap); 0.67 (d,  $J = 6.9$ , 3H);  $^{13}\text{C}\{^1\text{H}\}$  NMR (Diastereomers A and B, 125.8 MHz,  $\text{CDCl}_3$ )  $\delta$  133.0 (d,  $J = 3.3$  Hz), 133.0 (d,  $J = 3.0$  Hz), 131.2 (d,  $J = 135.1$  Hz), 130.9 (d,  $J = 12.0$  Hz), 130.8 (d,  $J = 11.8$  Hz), 130.7 (d,  $J = 134.5$  Hz), 128.8 (d,  $J = 14.1$  Hz), 79.1 (d,  $J = 7.1$  Hz), 77.8 (d,  $J = 7.2$  Hz), 48.9 (d,  $J = 6.1$  Hz), 48.7 (d,  $J = 6.1$  Hz), 43.7, 42.6 (d,  $J = 1.7$  Hz), 34.1, 34.1, 31.8, 31.7, 25.9, 25.7, 23.1, 22.1, 22.0, 21.1, 21.0, 15.9, 15.7; HRMS (ESI/TOF)  $m/z$ :  $[\text{M} + \text{Na}]^+$  Calcd for  $\text{C}_{16}\text{H}_{26}\text{O}_2\text{P}$  303.1490; Found 303.1486.

### 2.1.6. Preparation of *c*-heptyl phenyl-*H*-phosphinate (**1f**)

The *c*-heptyl phenyl-*H*-phosphinate (**1f**) was prepared according to Representative Procedure I. described in Section 2.1.1. by reacting 1.0 g (7.0 mmol) of phenyl-*H*-phosphinic acid (**4**), 0.85 mL (7.0 mmol) of *c*-heptanol and 2.7 g (14.0 mmol) of EDC·HCl in 20 mL of anhydrous DCM. The crude product was purified by flash column chromatography (silica gel, gradient elution, 100% hexane to 100% EtOAc) to give 1.6 g (95%) of *c*-heptyl phenyl-*H*-phosphinate (**1f**) as a clear oil.

$^{31}\text{P}\{^1\text{H}\}$  NMR (202.5 MHz,  $\text{CDCl}_3$ )  $\delta$  22.1;  $^1\text{H}$  NMR (500 MHz,  $\text{CDCl}_3$ )  $\delta$  7.79 – 7.75 (m, 2H), 7.61 (d,  $J = 558.0$ , 1H), 7.59 – 7.56 (m, 1H), 7.51 – 7.47 (m, 2H), 4.65 – 4.58 (m, 1H), 2.08 – 2.02 (m, 1H), 1.97 – 1.78 (m, 3H), 1.74 – 1.34 (m, 8H);  $^{13}\text{C}\{^1\text{H}\}$  NMR (125.8 MHz,  $\text{CDCl}_3$ )  $\delta$  133.0 (d,  $J = 3.0$ ), 131.0 (d,  $J = 11.8$ ), 130.8 (d,  $J = 133.5$ ), 128.8 (d,  $J = 13.8$ ), 78.9 (d,  $J = 6.8$ ), 36.2 (d,  $J = 4.1$ ), 35.8 (d,  $J = 3.6$ ), 28.1, 22.3 (d,  $J = 3.8$ ); HRMS (ESI/TOF)  $m/z$ :  $[\text{M} + \text{Na}]^+$  Calcd for  $\text{C}_{13}\text{H}_{19}\text{NaO}_2\text{P}$  261.1020; Found 261.1016.

### 2.1.7. Preparation of 1-methyl-*c*-hexyl phenyl-*H*-phosphinate (**1g**)

The (1-methyl-*c*-hexyl) phenyl-*H*-phosphinate (**1g**) was prepared according to Representative Procedure I. described in Section 2.1.1. by reacting 1.0 g (7.0 mmol) of phenyl-*H*-phosphinic acid (**4**), 0.88 mL (7.0 mmol) of 1-methyl-*c*-hexanol and 2.7 g (14.0 mmol) of EDC·HCl in 20 mL of anhydrous DCM. The crude product was purified by flash column chromatography (silica gel, gradient elution, 100% hexane to hexane – EtOAc 50% :50%) to give 0.72 g (43%) of 1-methyl-*c*-hexyl phenyl-*H*-phosphinate (**1g**) as a clear oil.

$^{31}\text{P}\{^1\text{H}\}$  NMR (202.5 MHz,  $\text{CDCl}_3$ )  $\delta$  14.5;  $^1\text{H}$  NMR (500 MHz,  $\text{CDCl}_3$ )  $\delta$  7.77 (d,  $J = 550.5$ , 1H), 7.79 – 7.74 (m, 2H), 7.56 – 7.52 (m, 1H), 7.49 – 7.45 (m, 2H), 2.07 – 2.01 (m, 2H), 1.72 – 1.46 (m, 11H);  $^{13}\text{C}\{^1\text{H}\}$  NMR (125.8 MHz,  $\text{CDCl}_3$ )  $\delta$  132.6 (d,  $J = 2.9$ ), 132.0 (d,  $J = 139.5$ ), 130.8 (d,  $J = 11.7$ ), 128.7 (d,  $J = 13.9$ ), 85.0 (d,  $J = 8.4$ ), 39.3 (d,  $J = 4.5$ ), 38.7 (d,  $J = 5.1$ ), 28.0, 25.2, 22.5, 22.3; HRMS (ESI/TOF)  $m/z$ :  $[\text{M} + \text{Na}]^+$  Calcd for  $\text{C}_{13}\text{H}_{19}\text{NaO}_2\text{P}$  261.1020; Found 261.1016.

### 2.1.8. Preparation of *t*-butyl phenyl-*H*-phosphinate (**1h**)

The *t*-butyl phenyl-*H*-phosphinate (**1h**) was prepared according to Representative Procedure I. described in Section 2.1.1. by reacting 1.0 g (7.0 mmol) of phenyl-*H*-phosphinic acid (**4**), 0.67 mL (7.0 mmol) of *t*-butanol and 2.7 g (14.0 mmol) of EDC·HCl in 20 mL of anhydrous DCM. The crude product was purified by flash column chromatography (silica gel, gradient elution,

100% hexane to 100% EtOAc) to give 1.1 g (80%) of *t*-butyl phenyl-*H*-phosphinate (**1h**) as a clear oil.

$^{31}\text{P}\{^1\text{H}\}$  NMR (202.5 MHz,  $\text{CDCl}_3$ )  $\delta$  15.2; ( $\delta_{\text{lit}}$  15.2);<sup>26</sup>  $^1\text{H}$  NMR (500 MHz,  $\text{CDCl}_3$ )  $\delta$  7.79 – 7.73 (m, 2H), 7.73 (d,  $J = 552.7$ , 1H), 7.57 – 7.54 (m, 1H), 7.50 – 7.46 (m, 2H), 1.56 (s, 9H);  $^{13}\text{C}\{^1\text{H}\}$  NMR (125.8 MHz,  $\text{CDCl}_3$ )  $\delta$  132.7 (d,  $J = 3.1$ ), 131.7 (d,  $J = 138.7$ ), 130.9 (d,  $J = 11.6$ ), 128.7 (d,  $J = 14.0$ ), 83.3 (d,  $J = 8.2$ ), 30.5 (d,  $J = 4.7$ ); HRMS (ESI/TOF)  $m/z$ : [ $2 \times \text{M} + \text{H}$ ]<sup>+</sup> Calcd for  $\text{C}_{20}\text{H}_{31}\text{O}_4\text{P}$  397.1698; Found 397.1697.

### 2.1.9. Preparation of 2,4-dimethyl-pent-3-yl phenyl-*H*-phosphinate (**1i**)

The 2,4-dimethyl-pent-3-yl phenyl-*H*-phosphinate (**1i**) was prepared according to Representative Procedure I. described in Section 2.1.1. by reacting 1.0 g (7.0 mmol) of phenyl-*H*-phosphinic acid (**4**), 0.99 mL (7.0 mmol) of 2,4-dimethyl-3-pentanol and 2.7 g (14.0 mmol) of EDC·HCl in 20 mL of anhydrous DCM. The crude product was purified by flash column chromatography (silica gel, gradient elution, 100% hexane to 100% EtOAc) to give 1.4 g (81%) of 2,4-dimethyl-pent-3-yl phenyl-*H*-phosphinate (**1i**) as a clear oil.

$^{31}\text{P}\{^1\text{H}\}$  NMR (202.5 MHz,  $\text{CDCl}_3$ )  $\delta$  26.1;  $^1\text{H}$  NMR (500 MHz,  $\text{CDCl}_3$ )  $\delta$  7.79 (dd,  $J = 14.0$ , 7.5, 2H), 7.70 (d,  $J = 556.8$ , 1H), 7.58 (t,  $J = 7.5$ , 1H), 7.52 – 7.48 (m, 2H), 4.08 (dt,  $J = 11.6$ , 5.6, 1H), 2.08 – 2.01 (m, 1H), 1.98 – 1.91 (m, 1H), 1.02 (d,  $J = 6.7$ , 6H), 0.94 (d,  $J = 6.7$ , 6H);  $^{13}\text{C}\{^1\text{H}\}$  NMR (125.8 MHz,  $\text{CDCl}_3$ )  $\delta$  132.9 (d,  $J = 2.8$ ), 131.5 (d,  $J = 136.2$ ), 130.7 (d,  $J = 11.6$ ), 128.8 (d,  $J = 14.0$ ), 88.4 (d,  $J = 8.2$ ), 30.8 (d,  $J = 3.3$ ), 30.4 (d,  $J = 3.2$ ), 20.4, 20.0, 17.8, 17.7; HRMS (ESI/TOF)  $m/z$ : [ $\text{M} + \text{Na}$ ]<sup>+</sup> Calcd for  $\text{C}_{13}\text{H}_{21}\text{NaO}_2\text{P}$  263.1177; Found 263.1171.

### 2.1.10. Preparation of benzyl phenyl-*H*-phosphinate (**1j**)

The benzyl phenyl-*H*-phosphinate (**1j**) was prepared according to Representative Procedure I. described in Section 2.1.1. by reacting 1.0 g (7.0 mmol) of phenyl-*H*-phosphinic acid (**4**), 0.73 mL (7.0 mmol) of benzyl alcohol and 2.7 g (14.0 mmol) of EDC·HCl in 20 mL of anhydrous DCM. The crude product was purified by flash column chromatography (silica gel, gradient elution, 100% hexane to 100% EtOAc) to give 1.4 g (86%) of benzyl phenyl-*H*-phosphinate (**1j**) as a clear oil.

$^{31}\text{P}\{^1\text{H}\}$  NMR (202.5 MHz,  $\text{CDCl}_3$ )  $\delta$  25.0 ( $\delta_{\text{lit}}$  25.6);<sup>27</sup>  $^1\text{H}$  NMR (500 MHz,  $\text{CDCl}_3$ )  $\delta$  7.81 – 7.76 (m, 2H), 7.64 (d,  $J = 566.1$ , 1H), 7.62 – 7.58 (m, 1H), 7.52 – 7.48 (m, 2H), 7.40 – 7.33 (m, 5H), 5.18 – 5.05 (m, 2H);  $^{13}\text{C}\{^1\text{H}\}$  NMR (125.8 MHz,  $\text{CDCl}_3$ )  $\delta$  135.7 (d,  $J = 6.7$ ), 133.3 (d,  $J = 3.0$ ), 131.1 (d,  $J = 11.9$ ), 129.8 (d,  $J = 131.9$ ), 128.9 (d,  $J = 14.1$ ), 128.8, 128.8, 128.2, 67.3



(d,  $J = 6.3$ ); HRMS (ESI/TOF)  $m/z$ :  $[M + Na]^+$  Calcd for  $C_{13}H_{13}NaO_2P$  255.0551; Found 255.0546.

## 2.2. Preparation of 1-adamantyl aryl-*H*-phosphinates (1k-p)

### 2.2.1. Preparation of 1-adamantyl (2-methylphenyl)-*H*-phosphinate (1k) (Representative Procedure II.)

The 1-adamantyl *H*-phosphinates (**1k-p**) were synthesized by a modified procedure of *Leclaire, Giordano et. al.*<sup>6</sup>

Under nitrogen atmosphere, a solution of 10 mmol of (2-methylphenyl)magnesium bromide in 15 mL of anhydrous THF was added dropwise over 4 hours to a solution of 2.5 g (10 mmol) of dichloro-1-adamantyloxyphosphine (**5**) in 5 mL of anhydrous THF at  $-50^\circ\text{C}$ . [The (2-methylphenyl)magnesium bromide was prepared by from 1.2 mL (10 mmol) of 2-bromotoluene and 0.27 g (11 mmol) of Mg in 15 mL of anhydrous THF.] The reaction mixture was stirred for 1 hour at  $-50^\circ\text{C}$ . Then, it was allowed to warm to  $25^\circ\text{C}$ , and it was stirred overnight. After that, 10 mL of water was added at  $0^\circ\text{C}$ , and the reaction mixture was stirred for 30 min at the same temperature. The phases were separated, the aqueous layer was extracted with DCM ( $3 \times 20$  mL). The organic layers were combined, dried ( $\text{Na}_2\text{SO}_4$ ) and evaporated. The crude product was purified by flash column chromatography (silica gel, gradient elution, 100% hexane to 100% EtOAc) to give 2.0 g (69%) of 1-adamantyl (2-methylphenyl)-*H*-phosphinate (**1k**) as a white solid.

mp.:  $49-50^\circ\text{C}$ ;  $^{31}\text{P}\{^1\text{H}\}$  NMR (202.5 MHz,  $\text{CDCl}_3$ )  $\delta$  15.2 ( $\delta_{\text{lit}}$  15.2);<sup>6</sup>  $^1\text{H}$  NMR (500 MHz,  $\text{CDCl}_3$ )  $\delta$  7.83 (d,  $J = 547.4$ , 1H), 7.81 – 7.76 (m, 1H), 7.44 – 7.40 (m, 1H), 7.31 – 7.27 (m, 1H), 7.23 – 7.21 (m, 1H), 2.55 (s, 3H), 2.21 (bs, 3H), 2.14 (bs, 6H), 1.65 (bs, 6H);  $^{13}\text{C}\{^1\text{H}\}$  NMR (125.8 MHz,  $\text{CDCl}_3$ )  $\delta$  140.9 (d,  $J = 10.6$ ), 132.5 (d,  $J = 2.8$ ), 131.7 (d,  $J = 13.0$ ), 131.1 (d,  $J = 12.1$ ), 130.0 (d,  $J = 136.9$ ), 125.8 (d,  $J = 14.4$ ), 82.7 (d,  $J = 8.5$ ), 44.2 (d,  $J = 4.7$ ), 35.9, 31.9, 20.2 (d,  $J = 6.7$ ); HRMS (ESI/TOF)  $m/z$ :  $[M + H]^+$  Calcd for  $C_{17}H_{24}O_2P$  291.1514; Found 291.1513.

### 2.2.2. Preparation of 1-adamantyl (3-methylphenyl)-*H*-phosphinate (1l)

The 1-adamantyl (3-methylphenyl)-*H*-phosphinate (**1l**) was prepared according to Representative Procedure II. described in Section 2.2.1. by reacting 2.5 g (10 mmol) of dichloro-1-adamantyloxyphosphine (**5**) in 5 mL of anhydrous THF with 10 mmol of (3-methylphenyl)magnesium bromide in 15 mL of anhydrous THF at  $-50^\circ\text{C}$ .

[The (3-methylphenyl)magnesium bromide was prepared by from 1.2 mL (10 mmol) of 3-bromotoluene and 0.27 g (11 mmol) of Mg in 15 mL of anhydrous THF.] The crude product was purified by flash column chromatography (silica gel, gradient elution, 100% hexane to 100% EtOAc) to give 2.1 g (74%) of 1-adamantyl (3-methylphenyl)-*H*-phosphinate (**1l**) as a white solid.

mp.: 82-84°C;  $^{31}\text{P}\{^1\text{H}\}$  NMR (202.5 MHz,  $\text{CDCl}_3$ )  $\delta$  14.7;  $^1\text{H}$  NMR (500 MHz,  $\text{CDCl}_3$ )  $\delta$  7.76 (d,  $J = 551.9$ , 1H), 7.59 – 7.52 (m, 2H), 7.38 – 7.33 (m, 2H), 2.39 (s, 3H), 2.20 (bs, 3H), 2.13 (d,  $J = 3.0$ , 6H), 1.65 (t,  $J = 3.1$ , 6H);  $^{13}\text{C}\{^1\text{H}\}$  NMR (125.8 MHz,  $\text{CDCl}_3$ )  $\delta$  138.5 (d,  $J = 13.8$ ), 133.4 (d,  $J = 3.1$ ), 131.7 (d,  $J = 137.5$ ), 131.4 (d,  $J = 11.7$ ), 128.6 (d,  $J = 14.7$ ), 128.0 (d,  $J = 11.7$ ), 82.6 (d,  $J = 8.6$ ), 44.3 (d,  $J = 4.7$ ), 35.8, 31.3, 21.5; HRMS (ESI/TOF)  $m/z$ :  $[\text{M} + \text{H}]^+$  Calcd for  $\text{C}_{17}\text{H}_{24}\text{O}_2\text{P}$  291.1514; Found 291.1510.

### 2.2.3. Preparation of 1-adamantyl (4-methylphenyl)-*H*-phosphinate (**1m**)

The 1-adamantyl (4-methylphenyl)-*H*-phosphinate (**1m**) was prepared according to Representative Procedure II. described in Section 2.2.1. by reacting 2.5 g (10 mmol) of dichloro-1-adamantyloxyphosphine (**5**) in 5 mL of anhydrous THF with 10 mmol of (4-methylphenyl)magnesium bromide in 15 mL of anhydrous THF at -50°C. [The (4-methylphenyl)magnesium bromide was prepared by from 1.2 mL (10 mmol) of 4-bromotoluene and 0.27 g (11 mmol) of Mg in 15 mL of anhydrous THF.] The crude product was purified by flash column chromatography (silica gel, gradient elution, 100% hexane to 100% EtOAc) to give 1.7 g (59%) of 1-adamantyl (4-methylphenyl)-*H*-phosphinate (**1m**) as a white solid.

mp.: 85-87°C;  $^{31}\text{P}\{^1\text{H}\}$  NMR (202.5 MHz,  $\text{CDCl}_3$ )  $\delta$  14.6;  $^1\text{H}$  NMR (500 MHz,  $\text{CDCl}_3$ )  $\delta$  7.76 (d,  $J = 552.5$ , 1H), 7.65 (dd,  $J = 13.7$ , 7.8 2H), 7.28 (dd,  $J = 8.0$ , 3.3, 2H), 2.40 (s, 3H), 2.20 (bs, 3H), 2.12 (bs, 6H), 1.65 (bs, 6H);  $^{13}\text{C}\{^1\text{H}\}$  NMR (125.8 MHz,  $\text{CDCl}_3$ )  $\delta$  143.1 (d,  $J = 3.0$ ), 131.0 (d,  $J = 12.1$ ), 129.4 (d,  $J = 14.4$ ), 128.8 (d,  $J = 140.2$ ), 82.5 (d,  $J = 8.5$ ), 44.3 (d,  $J = 4.7$ ), 35.9, 31.3, 21.8; HRMS (ESI/TOF)  $m/z$ :  $[\text{M} + \text{H}]^+$  Calcd for  $\text{C}_{16}\text{H}_{22}\text{O}_2\text{P}$  291.1514; Found 291.1513.

### 2.2.4. Preparation of 1-adamantyl (4-methoxyphenyl)-*H*-phosphinate (**1n**)

The 1-adamantyl (4-methoxyphenyl)-*H*-phosphinate (**1n**) was prepared according to Representative Procedure II. described in Section 2.2.1. by reacting 2.5 g (10 mmol) of dichloro-1-adamantyloxyphosphine (**5**) in 5 mL of anhydrous THF with 10 mmol of

(4-methoxyphenyl)magnesium bromide in 15 mL of anhydrous THF at -50°C. [The (4-methoxyphenyl)magnesium bromide was prepared by from 1.3 mL (10 mmol) of 4-bromoanisole and 0.27 g (11 mmol) of Mg in 15 mL of anhydrous THF.] The crude product was purified by flash column chromatography (silica gel, gradient elution, 100% hexane to 100% EtOAc) to give 1.5 g (50%) of 1-adamantyl (4-methoxyphenyl)-*H*-phosphinate (**1n**) as a white solid.

mp.: 101-104°C;  $^{31}\text{P}\{^1\text{H}\}$  NMR (202.5 MHz,  $\text{CDCl}_3$ )  $\delta$  14.1;  $^1\text{H}$  NMR (500 MHz,  $\text{CDCl}_3$ )  $\delta$  7.75 (d,  $J = 553.0$ , 1H), 7.72 – 7.67 (m, 2H), 6.98 – 6.96 (m, 2H), 3.84 (s, 3H), 2.20 (s, 3H), 2.11 (d,  $J = 3.0$ , 6H), 1.65 (t,  $J = 3.1$ , 6H);  $^{13}\text{C}\{^1\text{H}\}$  NMR (125.8 MHz,  $\text{CDCl}_3$ )  $\delta$  163.1 (d,  $J = 3.1$ ), 133.0 (d,  $J = 12.9$ ), 123.3 (d,  $J = 144.3$ ), 114.2 (d,  $J = 14.8$ ), 82.4 (d,  $J = 8.4$ ), 55.5, 44.3 (d,  $J = 4.6$ ), 35.9, 31.2 HRMS (ESI/TOF)  $m/z$ :  $[\text{M} + \text{H}]^+$  Calcd for  $\text{C}_{17}\text{H}_{24}\text{O}_3\text{P}$  307.1463; Found 307.1457.

### 2.2.5. Preparation of 1-adamantyl (1-naphthyl)-*H*-phosphinate (**1o**)

The 1-adamantyl (1-naphthyl)-*H*-phosphinate (**1o**) was prepared according to Representative Procedure II. described in Section 2.2.1. by reacting 2.5 g (10 mmol) of dichloro-1-adamantylphosphine (**5**) in 5 mL of anhydrous THF with 10 mmol of (1-naphthyl)magnesium bromide in 15 mL of anhydrous THF at -50°C. [The (1-naphthyl)magnesium bromide was prepared by from 1.4 mL (10 mmol) of 1-bromonaphthalene and 0.27 g (11 mmol) of Mg in 15 mL of anhydrous THF.] The crude product was purified by flash column chromatography (silica gel, gradient elution, 100% hexane to 100% EtOAc) to give 1.8 g (57%) of 1-adamantyl (1-naphthyl)-*H*-phosphinate (**1o**) as a dense oil.

$^{31}\text{P}\{^1\text{H}\}$  NMR (202.5 MHz,  $\text{CDCl}_3$ )  $\delta$  16.0;  $^1\text{H}$  NMR (500 MHz,  $\text{CDCl}_3$ )  $\delta$  8.46 (d,  $J = 8.4$ , 1H), 8.12 (d,  $J = 554.6$ , 1H), 8.10 – 8.03 (m, 2H), 7.92 – 7.90 (m, 1H), 7.63 – 7.54 (m, 3H), 2.22 – 2.18 (m, 9H), 1.66 (bs, 6H);  $^{13}\text{C}\{^1\text{H}\}$  NMR (125.8 MHz,  $\text{CDCl}_3$ )  $\delta$  133.6 (d,  $J = 10.6$ ), 133.5 (d,  $J = 3.1$ ), 132.5 (d,  $J = 10.5$ ), 131.9 (d,  $J = 12.8$ ), 129.1 (d,  $J = 1.9$ ), 128.0 (d,  $J = 135.1$ ), 127.5, 126.6, 125.3 (d,  $J = 7.3$ ), 124.9 (d,  $J = 16.4$ ), 83.4 (d,  $J = 8.4$ ), 44.3 (d,  $J = 4.6$ ), 35.9, 31.3; HRMS (ESI/TOF)  $m/z$ :  $[\text{M} + \text{H}]^+$  Calcd for  $\text{C}_{20}\text{H}_{24}\text{O}_2\text{P}$  349.1333; Found 349.1326.

### 2.2.6. Preparation of 1-adamantyl *t*-butyl-*H*-phosphinate (**1p**)

The 1-adamantyl *t*-butyl-*H*-phosphinate (**1p**) was prepared according to Representative Procedure II. described in Section 2.2.1. by reacting 2.5 g (10 mmol) of dichloro-1-

adamantylphosphine (**5**) in 5 mL of anhydrous THF with 5 mL (10 mmol) of 2M THF solution of (*t*-butyl)magnesium chloride at -50°C. The crude product was purified by flash column chromatography (silica gel, gradient elution, 100% hexane to 100% EtOAc) to give 1.8 g (71%) of 1-adamantyl *t*-butyl-*H*-phosphinate (**1p**) as a white solid.

mp.: 78-80°C;  $^{31}\text{P}\{^1\text{H}\}$  NMR (121.5 MHz,  $\text{CDCl}_3$ )  $\delta$  37.7 ( $\delta_{\text{lit}}$  37.5);<sup>6</sup>  $^1\text{H}$  NMR (500 MHz,  $\text{CDCl}_3$ )  $\delta$  6.88 (d,  $J = 509.8$ , 1H), 2.19 (bs, 3H), 2.03 (bs, 6H), 1.63 (s, 6H), 1.08 (d;  $J = 17.6$ , 9H);  $^{13}\text{C}\{^1\text{H}\}$  NMR (75.5 MHz,  $\text{CDCl}_3$ )  $\delta$  81.0 (d,  $J = 10.2$ ), 44.0 (d,  $J = 4.3$ ), 35.9, 31.2, 30.8 (d,  $J = 100.0$ ), 23.0; HRMS (ESI/TOF)  $m/z$ :  $[\text{M} + \text{H}]^+$  Calcd for  $\text{C}_{14}\text{H}_{26}\text{O}_2\text{P}$  257.1670; Found 257.1669.

## 2.3. Preparation of TADDOL-derivatives (**2d** and **2f**)

### 2.3.1. Preparation of ((2*R*,3*R*)-1,4-dioxaspiro[4.5]decane-2,3-diyl)bis(bis(4-(trifluoromethyl)phenyl)methanol) [(*R,R*-**2d**)] (Representative Procedure III.)

The TADDOL-derivatives (**2d** and **2f**) were synthesized by a modified procedure of *Seebach et. al.*<sup>3</sup>

Under nitrogen atmosphere, 2.5 g (8.7 mmol) of diethyl (2*R*,3*R*)-1,4-dioxaspiro[4.5]decane-2,3-dicarboxylate in 15 mL of anhydrous THF was added to a solution of 44 mmol of (4-trifluoromethylphenyl)magnesium bromide in 35 mL of anhydrous THF over 30 min at 0°C. [The (4-trifluoromethylphenyl)magnesium bromide was prepared by from 6.2 mL (44 mmol) of 4-bromobenzotrifluoride and 1.2 g (48 mmol) of Mg in 35 mL of anhydrous THF.] The reaction mixture was refluxed for 4 hours, then it was allowed to cool to 25°C, and it was stirred overnight at the same temperature. Then 40 mL of saturated  $\text{NH}_4\text{Cl}$  and 20 mL of water was added. The phases were separated, and the aqueous layer was extracted with DCM (3  $\times$  40 mL). The organic layers were combined, dried ( $\text{Na}_2\text{SO}_4$ ) and evaporated. The crude product was purified by flash column chromatography (silica gel, gradient elution, 100% hexane to 100%  $\text{CHCl}_3$ ) to give 4.9 g (72%) of ((2*R*,3*R*)-1,4-dioxaspiro[4.5]decane-2,3-diyl)bis(bis(4-(trifluoromethyl)phenyl)methanol) [(*R,R*-**2d**)] as a white solid.

mp.: 178°C;  $[\alpha]_{\text{D}}^{25} = -53.2$  ( $c = 1.0$ ,  $\text{CHCl}_3$ );  $^1\text{H}$  NMR (500 MHz,  $\text{CDCl}_3$ )  $\delta$  7.62 (q,  $J = 8.6$ , 8H), 7.54 (d,  $J = 8.4$ , 4H), 8.28 (d,  $J = 8.3$ , 4H), 4.49 (s, 2H), 4.32 (s, 2H), 1.48 – 1.44 (m, 4H), 1.34 – 1.19 (m, 6H);  $^{13}\text{C}\{^1\text{H}\}$  NMR (125.8 MHz,  $\text{CDCl}_3$ )  $\delta$  148.6, 146.0, 130.3 (q,  $J = 32.6$ ), 130.2 (q,  $J = 32.6$ ), 128.8, 128.0, 125.5 (q,  $J = 3.7$ ), 124.7 (q,  $J = 3.8$ ), 124.2 (q,  $J = 272.2$ ), 124.0 (q,  $J = 272.1$ ), 111.0, 80.5, 78.0, 36.7, 24.9, 24.0;  $^{19}\text{F}$  NMR (282 MHz,  $\text{CDCl}_3$ )  $\delta$  -62.5, -62.8.

### 2.3.2. Preparation of ((2*R*,3*R*)-1,4-dioxaspiro[4.5]decane-2,3-diyl)bis(di(naphthalen-2-yl)methanol) [(*R,R*)-2f]

The ((2*R*,3*R*)-1,4-dioxaspiro[4.5]decane-2,3-diyl)bis(di(naphthalen-2-yl)methanol) [(*R,R*)-2f] was prepared according to Representative Procedure III. described in Section 2.3.1. by reacting 2.5 g (8.7 mmol) of diethyl (2*R*,3*R*)-1,4-dioxaspiro[4.5]decane-2,3-dicarboxylate in 15 mL of anhydrous THF with 44 mmol of (2-naphthyl)magnesium bromide in 35 mL of anhydrous THF at 0°C. [The (2-naphthyl)magnesium bromide was prepared by from 9.1 g (44 mmol) of 2-bromonaphthalene and 1.2 g (48 mmol) of Mg in 35 mL of anhydrous THF.] The crude product was purified by flash column chromatography (silica gel, gradient elution, 100% hexane to 100% CHCl<sub>3</sub>) to give 4.7 g (77%) of ((2*R*,3*R*)-1,4-dioxaspiro[4.5]decane-2,3-diyl)bis(di(naphthalen-2-yl)methanol) [(*R,R*)-2f] as a white solid.

mp.: 197°C;  $[\alpha]_D^{25} = -121.9$  ( $c = 1.0$ , CHCl<sub>3</sub>); <sup>1</sup>H NMR (500 MHz, CDCl<sub>3</sub>) δ 8.18 (s, 2H), 7.99 (s, 2H), 7.87 – 7.86 (m, 4H), 7.79 – 7.66 (m, 8H), 7.57 – 7.40 (m, 10H), 7.29 (dd,  $J = 8.8, 1.9$ , 2H), 4.90 (s, 2H), 4.43 (d,  $J = 7.9$ , 2H), 1.57 – 1.45 (m, 4H), 1.39 – 1.27 (m, 6H); <sup>13</sup>C {<sup>1</sup>H} NMR (125.8 MHz, CDCl<sub>3</sub>) δ 142.9, 140.7, 132.9, 132.8, 132.8, 132.8, 128.8, 128.7, 128.0, 127.6, 127.5, 127.4, 127.2, 126.8, 126.3 (overlapping), 126.2, 126.1, 126.1, 126.1, 110.4, 81.1, 78.9, 36.9, 25.2, 24.2.

## 3. Representative resolution procedures and data

It was observed over the course of this research project that even the residual water content of the solvent may influence the outcome of the resolution in a negative manner. Thus, all solvents used for resolution were dried according to the standard procedures. Dry solvents were stored over molecular sieves 3Å or 4Å.

### 3.1. Resolving agent screening for the enantioseparation of 1-adamantyl phenyl-*H*-phosphinate (1a)

10 mg (0.036 mmol) of 1-Adamantyl phenyl-*H*-phosphinate (**1a**) was added to the hot solution of the corresponding resolving agent (0.5 equivalent, 0.018 mmol). Generally 30-100 μL was used from the corresponding solvent, but this amount was adjusted in a few instances to obtain a clear solution of the resolving agent.

The solution containing racemic **1a** and the corresponding resolving agent was allowed to cool to 25°C, and the diastereomers were allowed to crystallize without agitation. If crystals were

formed in the period of 1-7 days, they were collected by filtration. The enantiomeric mixture of 1-adamantyl phenyl-*H*-phosphinate (**1a**) was liberated by preparative TLC from *c.a.* 3 mg of the corresponding diastereomer. The enantiomeric excess values were measured by HPLC on a chiral stationary phase. Results are summarized in Fig. S1 and Table S1.

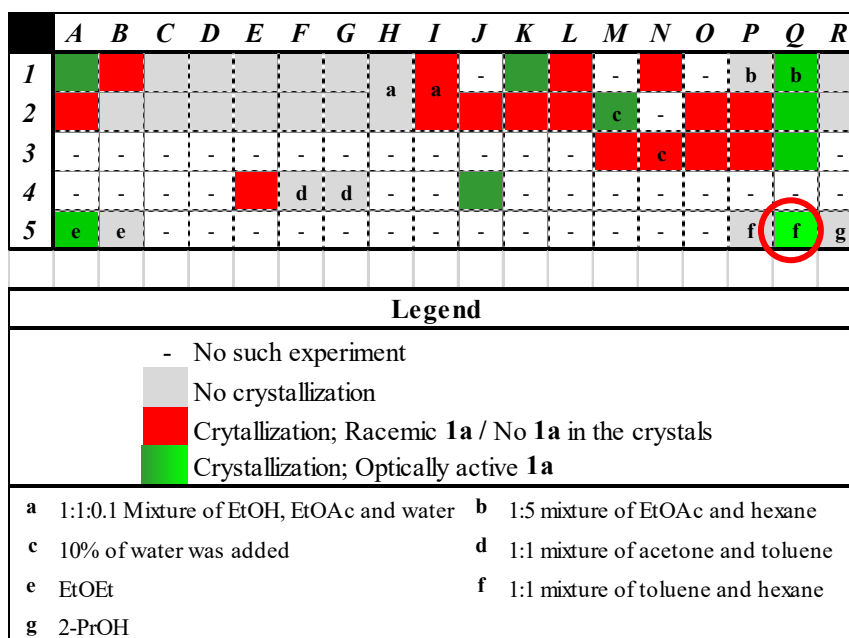

**Fig. S1:** ‘Heat map’<sup>28</sup> of the resolving agent screening for the enantioseparation of 1-adamantyl phenyl-*H*-phosphinate (**1a**); resolving agents A-R and solvents 1-5 can be found in Table S1; the brightness of the green color indicates the relative ee values in the range of 2-39%; the best result is marked with a red circle.

**Table S1:** Resolving agents and solvents used during screening.

|                                                                                                                 |                                                |
|-----------------------------------------------------------------------------------------------------------------|------------------------------------------------|
| <b>A:</b> ( <i>R</i> )-mandelic acid                                                                            | <b>1:</b> EtOAc                                |
| <b>B:</b> ( <i>R</i> )-2-chloromandelic acid                                                                    | <b>2:</b> EtOH                                 |
| <b>C:</b> (1 <i>S</i> )-10-camphorsulphonic acid                                                                | <b>3:</b> MeOH                                 |
| <b>D:</b> (1 <i>S</i> )-3-bromocamphor-10-sulfonic acid                                                         | <b>4:</b> acetone                              |
| <b>E:</b> ( <i>R,R</i> )-tartaric acid                                                                          | <b>5:</b> miscellaneous solvents, see footnote |
| <b>F:</b> <i>O,O'</i> -dibenzoyl-( <i>R,R</i> )-tartaric acid                                                   |                                                |
| <b>G:</b> <i>O,O'</i> -di-(4-toluoyl)-( <i>R,R</i> )-tartaric acid                                              |                                                |
| <b>H:</b> calcium hydrogen <i>O,O'</i> -dibenzoyl-( <i>R,R</i> )-tartrate                                       |                                                |
| <b>I:</b> calcium hydrogen <i>O,O'</i> -di-(4-toluoyl)-( <i>R,R</i> )-tartrate                                  |                                                |
| <b>J:</b> ( <i>R</i> )-phencyphos hydrate                                                                       |                                                |
| <b>K:</b> ( <i>S</i> )-1-phenylethylamine                                                                       |                                                |
| <b>L:</b> (+)-cinchonine                                                                                        |                                                |
| <b>M:</b> ( <i>S</i> )-alanine                                                                                  |                                                |
| <b>N:</b> ( <i>S</i> )- $\alpha$ -phenylglycine                                                                 |                                                |
| <b>O:</b> ( <i>S</i> )-phenylalanine                                                                            |                                                |
| <b>P:</b> (4 <i>R</i> ,5 <i>R</i> )-2,2-dimethyl-1,3-dioxolane-4,5-diyl)bis<br>(diphenylmethanol) (TADDOL)      |                                                |
| <b>Q:</b> (2 <i>R</i> ,3 <i>R</i> )-1,4-dioxaspiro[4.5]decane-2,3-diyl)bis<br>(diphenylmethanol) (spiro-TADDOL) |                                                |
| <b>R:</b> ( <i>S</i> )-1,1'-Bi(2-naphthol) (BINOL)                                                              |                                                |

### 3.2. Resolution of 1-adamantyl phenyl-*H*-phosphinate (**1a**) with 1-naphthyl-spiro-TADDOL [(*R,R*)-**2e**] (Representative procedure)

0.28 g (1.0 mmol) of Racemic 1-adamantyl phenyl-*H*-phosphinate (**1a**) and 0.70 g (1.0 mmol) of 1-naphthyl-spiro-TADDOL [(*R,R*)-**2e**] were dissolved in 5.3 mL of hot toluene, and then 5.3 mL of hexane was added. Colorless crystalline diastereomeric complex of (*R*)-**1a**·(*R,R*)-**2e** appeared immediately. After standing at 25°C for 3 hours, the crystals were separated by filtration, washed with 1.8 mL of hexane to give 0.47 g (95%) of (*R*)-**1a**·(*R,R*)-**2e** with a *de* of 81%. The diastereomeric complex (*R*)-**1a**·(*R,R*)-**2e** was purified by recrystallization from a mixture of 5.3 mL of toluene and 5.3 mL of hexane according to the procedure described above to afford 0.36 g (74%) of the (*R*)-**1a**·(*R,R*)-**2e** with a *de* of 99% (Scheme 3; Table S3, Entry 12). The (*R*)-1-admantyl phenyl-*H*-phosphinate [(*R*)-**1a**] was recovered from the diastereomer by flash column chromatography (silica gel, gradient elution, DCM to DCM – MeOH 95:5) to give 0.098 g (71%) of (*R*)-1-admantyl phenyl-*H*-phosphinate [(*R*)-**1a**] with an *ee* of 99%.

The resolution of 1-adamantyl phenyl-*H*-phosphinate (**1a**) with TADDOL derivatives [(*R,R*)-**2a-g**] (Fig. S2) were performed according to this representative procedure (Tables S2 and S3). When ethanol, 2-propanol or water was used as solvent, the corresponding diastereomer crystallized upon cooling. The crystals were washed with the corresponding solvent (Table S3, Entries 7-9). The resolution of *H*-phosphinates (**1b-p**) with 1-naphthyl-spiro-TADDOL [(*R,R*)-**2e**] were performed according to this representative procedure. All conditions and results can be found in Tables S4 and S5. Scheme 3 shows the selected results.



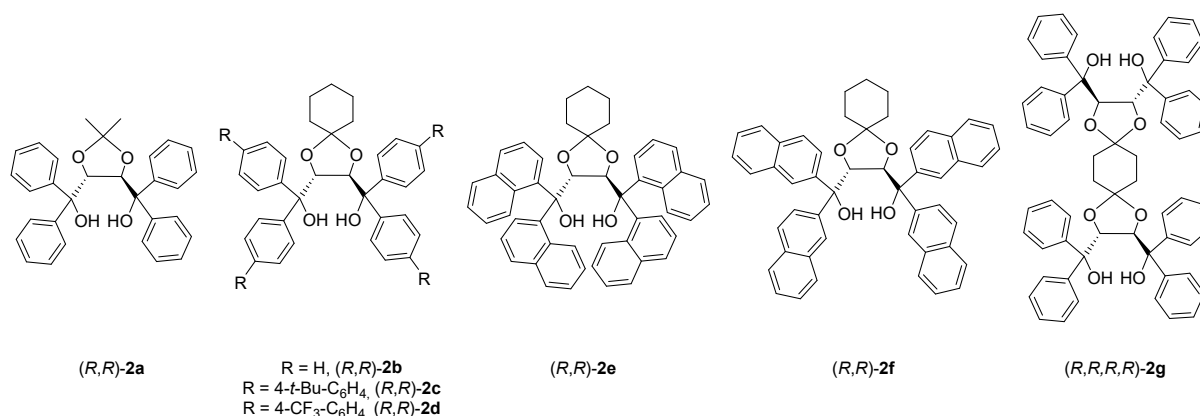

**Fig. S2:** TADDOL-derivatives [(*R,R*)-**2a-g**] used as resolving agents for the enantioseparation of 1-adamantyl phenyl-*H*-phosphinate (**1a**).

**Table S2.** Resolution of 1-adamantyl phenyl-*H*-phosphinate (**1a**) with TADDOL derivatives [(*R,R*)-**2a-g**].

| Entry | Resolving agent                               | Eq.  | Solvents <sup>a</sup>     | Diastereomeric complex <sup>b</sup>   | Yield <sup>c,f</sup> (%) | <i>ee</i> <sup>d,f</sup> (%) | <i>S<sub>c</sub></i> <sup>e,f</sup> (-) | Abs. Config. <sup>g</sup> |
|-------|-----------------------------------------------|------|---------------------------|---------------------------------------|--------------------------|------------------------------|-----------------------------------------|---------------------------|
| 1     | TADDOL ( <b>2a</b> )                          | 0.5  | 2.5×toluene<br>2.5×hexane | no complex                            | -                        | -                            | -                                       | -                         |
| 2     | TADDOL ( <b>2a</b> )                          | 0.5  | 5×toluene<br>5×hexane     | no complex                            | -                        | -                            | -                                       | -                         |
| 3     | spiro-TADDOL ( <b>2b</b> ) <sup>h</sup>       | 0.5  | 5×toluene<br>5×hexane     | ( <b>1a</b> )-spiro-TADDOL            | (73)<br><b>38</b>        | (60)<br><b>96</b>            | (0.44)<br><b>0.36</b>                   | ( <i>R</i> )              |
| 4     | 4- <i>t</i> -Bu-spiro-TADDOL ( <b>2c</b> )    | 0.5  | 2.5×toluene<br>2.5×hexane | no complex                            | -                        | -                            | -                                       | -                         |
| 5     | 4- <i>t</i> -Bu-spiro-TADDOL ( <b>2c</b> )    | 0.5  | 5×toluene<br>5×hexane     | no complex                            | -                        | -                            | -                                       | -                         |
| 6     | 4-CF <sub>3</sub> -spiro-TADDOL ( <b>2d</b> ) | 0.5  | 2.5×toluene<br>2.5×hexane | no complex                            | -                        | -                            | -                                       | -                         |
| 7     | 4-CF <sub>3</sub> -spiro-TADDOL ( <b>2d</b> ) | 0.5  | 5×toluene<br>5×hexane     | no complex                            | -                        | -                            | -                                       | -                         |
| 8     | 1-naphthyl-spiro-TADDOL ( <b>2e</b> )         | 0.5  | 5×toluene<br>5×hexane     | ( <b>1a</b> )-1-naphthyl-spiro-TADDOL | (85)<br><b>72</b>        | (72)<br><b>95</b>            | (0.61)<br><b>0.68</b>                   | ( <i>R</i> )              |
| 9     | 2-naphthyl-spiro-TADDOL ( <b>2f</b> )         | 0.5  | 2.5×toluene<br>2.5×hexane | no complex                            | -                        | -                            | -                                       | -                         |
| 10    | 2-naphthyl-spiro-TADDOL ( <b>2f</b> )         | 0.5  | 5×toluene<br>5×hexane     | no complex                            | -                        | -                            | -                                       | -                         |
| 11    | bis-spiro-TADDOL ( <b>2g</b> )                | 0.25 | 2.5×toluene<br>2.5×hexane | no complex                            | -                        | -                            | -                                       | -                         |
| 12    | bis-spiro-TADDOL ( <b>2g</b> )                | 0.25 | 5×toluene<br>5×hexane     | no complex                            | -                        | -                            | -                                       | -                         |

<sup>a</sup>Mixture of solvents for the crystallization and recrystallizations [mL of solvent/g of resolving agent].

<sup>b</sup>The ratio of *H*-phosphinate (**1**) and the resolving agent was determined by <sup>1</sup>H NMR.

<sup>c</sup>The yield of the diastereomer was calculated based on the half of the racemic *H*-phosphinate (**1**) that is regarded to be 100% for each antipode.

<sup>d</sup>Determined by HPLC using a chiral stationary phase.

<sup>e</sup>Resolving capability, also known as the Fogassy parameter [*S* (-) = (Yield [%]/100) × (*ee* [%]/100)].<sup>29</sup>

<sup>f</sup>The results obtained after the first crystallization are shown in parentheses, while the results obtained after one recrystallization are shown in boldface.

<sup>g</sup>Absolute configuration of the *H*-phosphinate (**1**) was determined by X-ray analysis.

<sup>h</sup>The diastereomer was purified by two recrystallizations.

**Table S3.** Resolution of 1-adamantyl-phenyl-*H*-phosphinate (**1a**) with 1-naphthyl-spiro-TADDOL [(*R,R*)-**2e**].

| Entry           | Eq. | Solvents <sup>a</sup>        | Diastereomeric complex <sup>b</sup>                | Yield <sup>c,f</sup> (%) | <i>ee</i> <sup>d,f</sup> (%) | <i>S<sub>c</sub></i> <sup>e,f</sup> (-) | Abs. Config. <sup>g</sup> |
|-----------------|-----|------------------------------|----------------------------------------------------|--------------------------|------------------------------|-----------------------------------------|---------------------------|
| 1               | 0.5 | 5×toluene 5×hexane           | ( <b>1a</b> )·1-naphthyl-spiro-TADDOL              | (85)<br><b>72</b>        | (72)<br><b>95</b>            | (0.61)<br><b>0.68</b>                   | ( <i>R</i> )              |
| 2               | 0.5 | 5× <i>p</i> -xylene 5×hexane | ( <b>1a</b> )·1-naphthyl-spiro-TADDOL              | (64)<br><b>42</b>        | (82)<br><b>98</b>            | (0.53)<br><b>0.41</b>                   | ( <i>R</i> )              |
| 3               | 0.5 | 5×cymene 5×hexane            | no complex                                         | -                        | -                            | -                                       | -                         |
| 4               | 0.5 | 5×anisole 5×hexane           | ( <b>1a</b> )·1-naphthyl-spiro-TADDOL              | (59)<br><b>35</b>        | (93)<br><b>99</b>            | (0.52)<br><b>0.35</b>                   | ( <i>R</i> )              |
| 5               | 0.5 | 5×toluene                    | ( <b>1a</b> )·1-naphthyl-spiro-TADDOL              | (66)<br><b>48</b>        | (88)<br><b>99</b>            | (0.59)<br><b>0.47</b>                   | ( <i>R</i> )              |
| 6               | 0.5 | 2×EtOAc 10×hexane            | ( <b>1a</b> )·1-naphthyl-spiro-TADDOL              | (59)                     | (77)                         | (0.46)                                  | ( <i>R</i> )              |
| 7               | 0.5 | 6×2-PrOH                     | ( <b>1a</b> )·1-naphthyl-spiro-TADDOL <sub>2</sub> | (32)                     | (4)                          | (0.01)                                  | ( <i>S</i> )              |
| 8               | 0.5 | 6×EtOH                       | 1-naphthyl-spiro-TADDOL                            | -                        | -                            | -                                       | -                         |
| 9               | 0.5 | 15×H <sub>2</sub> O          | ( <b>1a</b> )·1-naphthyl-spiro-TADDOL              | (87)                     | (4)                          | (0.03)                                  | ( <i>S</i> )              |
| 10              | 1   | 5×toluene 5×hexane           | ( <b>1a</b> )·1-naphthyl-spiro-TADDOL              | (98)<br><b>77</b>        | (77)<br><b>96</b>            | (0.75)<br><b>0.74</b>                   | ( <i>R</i> )              |
| 11              | 1   | 2.5×toluene                  | ( <b>1a</b> )·1-naphthyl-spiro-TADDOL              | (88)<br><b>66</b>        | (82)<br><b>99</b>            | (0.73)<br><b>0.66</b>                   | ( <i>R</i> )              |
| 12              | 1   | 7.5×toluene<br>7.5×hexane    | ( <b>1a</b> )·1-naphthyl-spiro-TADDOL              | (95)<br><b>74</b>        | (81)<br><b>99</b>            | (0.77)<br><b>0.74</b>                   | ( <i>R</i> )              |
| 13              | 1   | 10×toluene 10×hexane         | ( <b>1a</b> )·1-naphthyl-spiro-TADDOL              | (91)<br><b>61</b>        | (86)<br><b>99</b>            | (0.78)<br><b>0.61</b>                   | ( <i>R</i> )              |
| 14 <sup>h</sup> | 1   | 7.5×toluene<br>7.5×hexane    | ( <b>1a</b> )·1-naphthyl-spiro-TADDOL              | (93)<br><b>75</b>        | (84)<br><b>99</b>            | (0.78)<br><b>0.75</b>                   | ( <i>R</i> )              |

<sup>a-g</sup>See Table S2.

<sup>h</sup>The resolution was performed on a gram-scale.

**Table S4.** Resolution of alkyl phenyl-*H*-phosphinates (**1b-j**) with 1-naphthyl-spiro-TADDOL [(*R,R*)-**2e**].

| Entry          | RO                                     | Solvents <sup>a</sup>     | Diastereomeric complex <sup>b</sup>   | Yield <sup>c</sup> (%) | <i>ee</i> <sup>d</sup> (%) | <i>S<sub>c</sub></i> <sup>e,f</sup> (-) | Abs. Config. <sup>g</sup> |
|----------------|----------------------------------------|---------------------------|---------------------------------------|------------------------|----------------------------|-----------------------------------------|---------------------------|
| 1              | 2-AdO ( <b>1b</b> )                    | 7.5×toluene<br>7.5×hexane | ( <b>1b</b> )·1-naphthyl-spiro-TADDOL | (103)<br><b>84</b>     | (75)<br><b>96</b>          | (0.77)<br><b>0.80</b>                   | ( <i>R</i> )              |
| 2              | 2-AdO ( <b>1b</b> )                    | 10×toluene<br>10×hexane   | ( <b>1b</b> )·1-naphthyl-spiro-TADDOL | (92)<br><b>62</b>      | (78)<br><b>98</b>          | (0.72)<br><b>0.60</b>                   | ( <i>R</i> )              |
| 3              | <i>c</i> -PentO ( <b>1c</b> )          | 7.5×toluene<br>7.5×hexane | ( <b>1c</b> )·1-naphthyl-spiro-TADDOL | (93)<br><b>68</b>      | (84)<br><b>98</b>          | (0.78)<br><b>0.67</b>                   | ( <i>R</i> )              |
| 4              | <i>c</i> -HexO ( <b>1d</b> )           | 7.5×toluene<br>7.5×hexane | ( <b>1d</b> )·1-naphthyl-spiro-TADDOL | (86)<br><b>65</b>      | (92)<br><b>&gt;99</b>      | (0.79)<br><b>0.65</b>                   | ( <i>R</i> )              |
| 5              | (-)-MentO ( <b>1e</b> )                | 7.5×toluene<br>7.5×hexane | ( <b>1e</b> )·1-naphthyl-spiro-TADDOL | (55)                   | (96)                       | (0.53)                                  | ( <i>R<sub>p</sub></i> )  |
| 6              | <i>c</i> -HeptO ( <b>1f</b> )          | 7.5×toluene<br>7.5×hexane | ( <b>1f</b> )·1-naphthyl-spiro-TADDOL | (86)<br><b>64</b>      | (91)<br><b>&gt;99</b>      | (0.78)<br><b>0.64</b>                   | ( <i>R</i> )              |
| 7 <sup>h</sup> | (1-Me)- <i>c</i> -HexO ( <b>1g</b> )   | 5×toluene<br>5×hexane     | ( <b>1g</b> )·1-naphthyl-spiro-TADDOL | (49)                   | (62)                       | (0.30)                                  | ( <i>R</i> ) <sup>i</sup> |
| 8 <sup>h</sup> | (1-Me)- <i>c</i> -HexO ( <b>1g</b> )   | 7.5×toluene<br>7.5×hexane | ( <b>1g</b> )·1-naphthyl-spiro-TADDOL | (44)                   | (96)                       | (0.42)                                  | ( <i>R</i> )              |
| 9              | <i>t</i> -BuO ( <b>1h</b> )            | 7.5×toluene<br>7.5×hexane | ( <b>1h</b> )·1-naphthyl-spiro-TADDOL | (65)<br><b>30</b>      | (84)<br><b>99</b>          | (0.54)<br><b>0.30</b>                   | ( <i>S</i> )              |
| 10             | 2,4-di- <i>Me</i> -PentO ( <b>1i</b> ) | 7.5×toluene<br>7.5×hexane | no complex                            | -                      | -                          | -                                       | -                         |
| 11             | BnO ( <b>1j</b> )                      | 7.5×toluene<br>7.5×hexane | ( <b>1j</b> )·1-naphthyl-spiro-TADDOL | (67)<br><b>37</b>      | (94)<br><b>&gt;99</b>      | (0.63)<br><b>0.37</b>                   | ( <i>R</i> )              |
| 12             | BnO ( <b>1j</b> )                      | 5×toluene<br>5×hexane     | ( <b>1j</b> )·1-naphthyl-spiro-TADDOL | (82)<br><b>49</b>      | (81)<br><b>&gt;99</b>      | (0.66)<br><b>0.49</b>                   | ( <i>R</i> )              |

<sup>a-g</sup>See Table S2. <sup>h</sup> The crystallization(s) were performed at 0°C. <sup>i</sup> The assignment of absolute P-configuration is ambiguous.

**Table S5.** Resolution of 1-adamantyl *H*-phosphinates (**1k-p**) with 1-naphthyl-spiro-TADDOL [(*R,R*)-**2e**] under optimized conditions.

| Entry          | Y                                                 | Solvents <sup>a</sup>     | Diastereomeric complex <sup>b</sup>   | Yield <sup>c,f</sup> (%) | <i>ee</i> <sup>d,f</sup> (%) | <i>S<sub>c</sub></i> <sup>e,f</sup> (-) | Abs. Config. <sup>g</sup> |
|----------------|---------------------------------------------------|---------------------------|---------------------------------------|--------------------------|------------------------------|-----------------------------------------|---------------------------|
| 1              | 2-Me-C <sub>6</sub> H <sub>4</sub> ( <b>1k</b> )  | 7.5×toluene<br>7.5×hexane | ( <b>1k</b> )·1-naphthyl-spiro-TADDOL | (82)<br><b>53</b>        | (80)<br><b>98</b>            | (0.66)<br><b>0.52</b>                   | ( <i>R</i> )              |
| 2 <sup>h</sup> | 3-Me-C <sub>6</sub> H <sub>4</sub> ( <b>1l</b> )  | 7.5×toluene<br>7.5×hexane | ( <b>1l</b> )·1-naphthyl-spiro-TADDOL | (71)<br><b>24</b>        | (64)<br><b>91</b>            | (0.45)<br><b>0.21</b>                   | ( <i>R</i> ) <sup>i</sup> |
| 3              | 4-Me-C <sub>6</sub> H <sub>4</sub> ( <b>1m</b> )  | 7.5×toluene<br>7.5×hexane | ( <b>1m</b> )·1-naphthyl-spiro-TADDOL | (87)<br><b>65</b>        | (94)<br><b>&gt;99</b>        | (0.81)<br><b>0.65</b>                   | ( <i>R</i> )              |
| 4              | 4-MeO-C <sub>6</sub> H <sub>4</sub> ( <b>1n</b> ) | 7.5×toluene<br>7.5×hexane | no complex                            |                          |                              |                                         |                           |
| 5              | 1-Naph ( <b>1o</b> )                              | 7.5×toluene<br>7.5×hexane | no complex                            |                          |                              |                                         |                           |
| 6              | <i>t</i> -Bu ( <b>1p</b> )                        | 7.5×toluene<br>7.5×hexane | no complex                            | -                        | -                            | -                                       | -                         |

<sup>a-g</sup>See Table S2 <sup>h</sup> The crystallization(s) were performed at 0°C. <sup>i</sup> The assignment of absolute P-configuration is ambiguous.

(*R*)-1-admantyl phenyl-*H*-phosphinate [(*R*)-**1a**]:  $[\alpha]_{\text{D}}^{25} = +44.5$  ( $c = 0.7$ ,  $\text{CHCl}_3$ ,  $ee = 99\%$ ,  $R_{\text{P}}$ );  $[\alpha]_{\text{D}}^{25}(\text{lit}) = +44.3$  ( $c = 1.07$ ,  $\text{CHCl}_3$ ,  $ee = 98\%$ ,  $R_{\text{P}}$ );<sup>6</sup> Chiral HPLC: Phenomenex Lux 5  $\mu\text{m}$  Amylose-2 column, hexane/ethanol (50:50),  $t_{\text{R}1}$  7.6 min (*S*)-(-)-**1a**,  $t_{\text{R}2}$  13.8 min (*R*)-(+)-**1a**.

(*R*)-2-admantyl phenyl-*H*-phosphinate [(*R*)-**1b**]:  $[\alpha]_{\text{D}}^{25} = +31.7$  ( $c = 3.6$ ,  $\text{CHCl}_3$ ,  $ee = 97\%$ ,  $R_{\text{P}}$ ); Chiral HPLC: Phenomenex Lux 5  $\mu\text{m}$  Amylose-2 column, hexane/ethanol (50:50),  $t_{\text{R}1}$  7.5 min (*S*)-(-)-**1b**,  $t_{\text{R}2}$  14.1 min (*R*)-(+)-**1b**.

(*R*)-*c*-pentyl phenyl-*H*-phosphinate [(*R*)-**1c**]:  $[\alpha]_{\text{D}}^{25} = +36.2$  ( $c = 1.4$ ,  $\text{CHCl}_3$ ,  $ee = 98\%$ ,  $R_{\text{P}}$ ); Chiral HPLC: Phenomenex Lux 5  $\mu\text{m}$  Amylose-2 column, hexane/ethanol (50:50),  $t_{\text{R}1}$  7.6 min (*R*)-(+)-**1c**,  $t_{\text{R}2}$  9.0 min (*S*)-(-)-**1c**.

(*R*)-*c*-hexyl phenyl-*H*-phosphinate [(*R*)-**1d**]:  $[\alpha]_{\text{D}}^{25} = +42.3$  ( $c = 4.1$ ,  $\text{CHCl}_3$ ,  $ee = 99\%$ ,  $R_{\text{P}}$ ); Chiral HPLC: Phenomenex Lux 5  $\mu\text{m}$  Amylose-2 column, hexane/ethanol (50:50),  $t_{\text{R}1}$  7.6 min (*R*)-(+)-**1d**,  $t_{\text{R}2}$  9.8 min (*S*)-(-)-**1d**.

(*R*<sub>P</sub>)-(1*R*,2*S*,5*R*)-2-isopropyl-5-methyl-*c*-hexyl phenyl-*H*-phosphinate [(*R*<sub>P</sub>)-**1e**]:  $[\alpha]_{\text{D}}^{25} = -33.9$  ( $c = 2.0$ ,  $\text{CHCl}_3$ ,  $de = 96\%$ ,  $R_{\text{P}}$ ),  $[\alpha]_{\text{D}}^{25}(\text{lit}) = -35.5$  ( $\text{CHCl}_3$ ,  $de = 95\%$ ,  $R_{\text{P}}$ );<sup>30</sup> Chiral HPLC: Phenomenex Lux 5  $\mu\text{m}$  Amylose-2 column, hexane/ethanol (85:15),  $t_{\text{R}1}$  7.5 min (*S*<sub>P</sub>)-**1e**,  $t_{\text{R}2}$  10.1 min (*R*<sub>P</sub>)-**1e**.

(*R*)-*c*-heptyl phenyl-*H*-phosphinate [(*R*)-**1f**]:  $[\alpha]_{\text{D}}^{25} = +37.6$  ( $c = 1.3$ ,  $\text{CHCl}_3$ ,  $ee = 99\%$ ,  $R_{\text{P}}$ ); Chiral HPLC: Phenomenex Lux 3  $\mu\text{m}$  Cellulose-4 column, hexane/ethanol (50:50),  $t_{\text{R}1}$  6.2 min (*S*)-(-)-**1f**,  $t_{\text{R}2}$  8.6 min (*R*)-(+)-**1f**.

(*R*)-1-methyl-*c*-hexyl phenyl-*H*-phosphinate [(*R*)-**1g**]:  $[\alpha]_{\text{D}}^{25} = +28.2$  ( $c = 2.5$ ,  $\text{CHCl}_3$ ,  $ee = 96\%$ ,  $R_{\text{P}}$ ); Chiral HPLC: Phenomenex Lux 5  $\mu\text{m}$  Amylose-2 column, hexane/ethanol (50:50),  $t_{\text{R}1}$  6.4 min, (*S*)-(-)-**1g**,  $t_{\text{R}2}$  8.9 min (*R*)-(+)-**1g**.

(*S*)-*t*-butyl phenyl-*H*-phosphinate [(*S*)-**1h**]:  $[\alpha]_{\text{D}}^{25} = -37.0$  ( $c = 2.0$ ,  $\text{CHCl}_3$ ,  $ee = 99\%$ ,  $S_{\text{P}}$ ); Chiral HPLC: Phenomenex Lux 5  $\mu\text{m}$  Amylose-2 column, hexane/ethanol (50:50),  $t_{\text{R}1}$  5.5 min, (*S*)-(-)-**1h**,  $t_{\text{R}2}$  6.6 min (*R*)-(+)-**1h**.

(*R*)-benzyl phenyl-*H*-phosphinate [(*R*)-**1j**]:  $[\alpha]_{\text{D}}^{25} = -1.5$  ( $c = 1.5$ ,  $\text{CHCl}_3$ ,  $ee = 99\%$ ,  $R_{\text{P}}$ ); Chiral HPLC: Phenomenex Lux 5  $\mu\text{m}$  Amylose-2 column, hexane/ethanol (50:50),  $t_{\text{R}1}$  10.5 min, (*R*)-(-)-**1j**,  $t_{\text{R}2}$  13.6 min (*S*)-(+)-**1j**.

(*R*)-1-admantyl (2-methyl-phenyl)-*H*-phosphinate [(*R*)-**1k**]:  $[\alpha]_{\text{D}}^{25} = +28.5$  ( $c = 1.6$ ,  $\text{CHCl}_3$ ,  $ee = 98\%$ ,  $R_{\text{P}}$ ),  $[\alpha]_{\text{D}}^{25}(\text{lit}) = +25.1$  ( $c = 1.0$ ,  $\text{CHCl}_3$ ,  $ee = 99\%$ ,  $R_{\text{P}}$ );<sup>6</sup> Chiral HPLC: Phenomenex Lux 5  $\mu\text{m}$  Amylose-2 column, hexane/ethanol (50:50),  $t_{\text{R}1}$  6.8 min (*S*)-(-)-**1k**,  $t_{\text{R}2}$  10.6 min (*R*)-(+)-**1k**.

(*R*)-1-admantyl (3-methyl-phenyl)-*H*-phosphinate [(*R*)-**11**]:  $[\alpha]_{\text{D}}^{25} = +32.0$  ( $c = 1.7$ ,  $\text{CHCl}_3$ ,  $ee = 91\%$ ,  $R_{\text{p}}$ ); Chiral HPLC: Phenomenex Lux 5  $\mu\text{m}$  Amylose-2 column, hexane/ethanol (50:50),  $t_{\text{R}1}$  8.4 min (*S*)-(-)-**11**,  $t_{\text{R}2}$  10.0 min (*R*)-(+)-**11**.

(*R*)-1-admantyl (4-methyl-phenyl)-*H*-phosphinate [(*R*)-**1m**]:  $[\alpha]_{\text{D}}^{25} = +34.2$  ( $c = 1.4$ ,  $\text{CHCl}_3$ ,  $ee = 99\%$ ,  $R_{\text{p}}$ ); Chiral HPLC: Phenomenex Lux 5  $\mu\text{m}$  Cellulose-2 column, hexane/ethanol (50:50),  $t_{\text{R}1}$  8.9 min (*S*)-(-)-**1m**,  $t_{\text{R}2}$  16.1 min (*R*)-(+)-**1m**.

#### 4. Gram-scale resolution of 1-adamantyl phenyl-*H*-phosphinate (**1a**) with 1-naphthyl-spiro-TADDOL [(*R,R*)-**2e**]

4.0 g (14.5 mmol) of Racemic 1-adamantyl phenyl-*H*-phosphinate (**1a**) and 10.2 g (14.5 mmol) of 1-naphthyl-spiro-TADDOL [(*R,R*)-**2e**] were dissolved in 75 mL of hot toluene, and then 75 mL of hexane was added. Colorless crystalline diastereomeric complex of (*R*)-**1a**·(*R,R*)-**2e** appeared immediately. After standing at 25°C for 3 hours, the crystals were separated by filtration, washed with 25 mL of hexane to give 6.6 g (93%) of (*R*)-**1a**·(*R,R*)-**2e** with a *de* of 84%. The diastereomeric complex (*R*)-**1a**·(*R,R*)-**2e** was purified by recrystallization from a mixture of 75 mL of toluene and 75 mL of hexane according to the procedure described above to afford 5.3 g (75%) of the (*R*)-**1a**·(*R,R*)-**2e** with a *de* of 99% (Scheme 3; Table S3, Entry 14). The (*R*)-1-admantyl phenyl-*H*-phosphinate [(*R*)-**1a**] was recovered from the diastereomer by flash column chromatography (silica gel, gradient elution, DCM to DCM – MeOH 95:5) to give 1.4 g (72%) of (*R*)-1-admantyl phenyl-*H*-phosphinate [(*R*)-**1a**] with an *ee* of 99%.

#### 5. Recrystallization of enantiomeric mixtures of (*R*)-1-adamantyl phenyl-*H*-phosphinate [(*R*)-**1a**]

The enantiomeric mixtures of (*R*)-1-adamantyl phenyl-*H*-phosphinate [(*R*)-**1a**] were prepared either by the decomposition of the corresponding diastereomeric complex, or by mixing the racemate (**1a**) and the (*R*)-enantiomer [(*R*)-**1a**].

Under nitrogen atmosphere 31 mg (0.11 mmol) of (*R*)-1-adamantyl phenyl-*H*-phosphinate [(*R*)-**1a**] with an *ee* of 22%, was dissolved in 50  $\mu\text{L}$  of EtOAc at 25°C. The solution was kept at -20°C for 24 hours then crystals were separated by filtration, washed with 25  $\mu\text{L}$  of cold hexane to afford 16 mg (51%) of (*R*)-1-adamantyl phenyl-*H*-phosphinate [(*R*)-**1a**] with an *ee* of

21%. The mother liquor was evaporated to afford 15 mg (48%) of (*R*)-1-adamantyl phenyl-*H*-phosphinate [(*R*)-**1a**] with an *ee* of 23% (Table S6, Entry 2).

The recrystallization of enantiomeric mixtures with different *ee* were performed according to this representative procedure. Table S6 and Fig. S3 contain the results.

**Table S6.** Recrystallization of enantiomeric mixtures of (*R*)-1-adamantyl phenyl-*H*-phosphinate [(*R*)-**1a**].

| Entry | $ee_0^a$<br>(%) | $ee_{\text{crystal}}^a$<br>(%) | $Y_{\text{crystal}}$<br>(%) | $ee_{\text{mother liquor}}^a$<br>(%) | $Y_{\text{mother liquor}}$<br>(%) |
|-------|-----------------|--------------------------------|-----------------------------|--------------------------------------|-----------------------------------|
| 1     | 8               | 4                              | 49                          | 11                                   | 45                                |
| 2     | 22              | 21                             | 51                          | 23                                   | 48                                |
| 3     | 31              | 29                             | 45                          | 33                                   | 53                                |
| 4     | 39              | 82                             | 41                          | 12                                   | 56                                |
| 5     | 59              | 85                             | 59                          | 26                                   | 41                                |
| 6     | 82              | 93                             | 68                          | 54                                   | 31                                |

<sup>a</sup>Determined by HPLC using a chiral stationary phase.

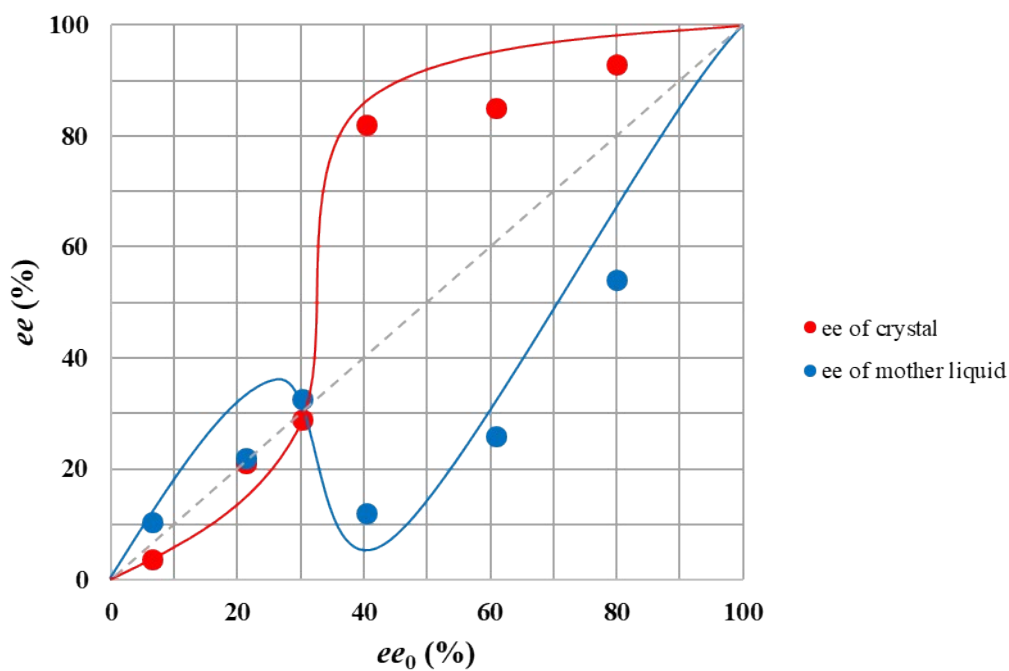

**Fig. S3.**  $ee_0 - ee$  Diagram of the recrystallization of enantiomeric mixtures of (*R*)-1-adamantyl phenyl-*H*-phosphinate [(*R*)-**1a**].

## 6. Decomposition of the diastereomeric complex (*R*)-**1a**·(*R,R*)-**2e**

100 mg (0.10 mmol) of (*R*)-**1a**·(*R,R*)-**2e** diastereomeric complex was dissolved in 0.43 mL of hot ethanol. Colorless crystalline complex of [(*R,R*)-**2e**]·EtOH appeared immediately. After standing at 25°C for 16 hours, the crystals were separated by filtration, washed with 0.10 mL of ethanol to give 70 mg (91%) of [(*R,R*)-**2e**]·EtOH (Table S7, Entry 1). The remaining mother liquor was evaporated, and redissolved in DCM, and filtered through a small plug of silica gel with DCM, to elute (*R,R*)-**2e**. Then the silica gel was washed with DCM – MeOH 95:5, to give 27 mg (0.097 mmol) of (*R*)-1-admantyl phenyl-*H*-phosphinate [(*R*)-**1a**] with an *ee* of 99%. The decomposition of the diastereomeric complex (*R*)-**1a**·(*R,R*)-**2e** with MeOH or EtOH and hexane were performed according to this representative procedure. Results are summarized in Table S7.

**Table S7.** Decomposition of the diastereomeric complex (*R*)-**1a**·(*R,R*)-**2e**.

| Entry | Solvent <sup>a</sup> | Crystallization temp (°C) | Yield of EtOH·[( <i>R,R</i> )- <b>2e</b> ] (%)                   |
|-------|----------------------|---------------------------|------------------------------------------------------------------|
| 1     | 6×EtOH               | 25                        | 91                                                               |
| 2     | 6×MeOH               | 25                        | mixture of ( <i>R</i> )- <b>1a</b> and ( <i>R,R</i> )- <b>2e</b> |
| 3     | 6×EtOH<br>3×hexane   | 25                        | mixture of ( <i>R</i> )- <b>1a</b> and ( <i>R,R</i> )- <b>2e</b> |
| 4     | 3×EtOH               | 25                        | 65                                                               |
| 5     | 9×EtOH               | 25                        | mixture of ( <i>R</i> )- <b>1a</b> and ( <i>R,R</i> )- <b>2e</b> |
| 6     | 6×EtOH               | 0                         | 80                                                               |
| 7     | 6×EtOH               | -20                       | 61                                                               |

<sup>a</sup>Mixture of solvents for the crystallization [mL of solvent/g of (*R,R*)-**2e**].

## 7. Complete procedure for the preparation of (*R*)- and (*S*)-1-adamantyl phenyl-*H*-phosphinate [(*R*)-**1a** and (*S*)-**1a**]

To a solution of 1.0 g (7.0 mmol) of phenyl-*H*-phosphinic acid (**4**) and 1.1 g (7.0 mmol) of 1-adamantanol in 20 mL of anhydrous DCM, 2.7 g (17.0 mmol) of EDC·HCl was added in 4 portions over 20 min under nitrogen atmosphere at 25°C. The resulting solution was stirred at this temperature for an additional 2 hours. Then, it was washed with 2 M HCl solution (2 × 20 mL), and the acidic phases were combined and extracted with DCM (3 × 20 mL). The combined organic layers were dried (Na<sub>2</sub>SO<sub>4</sub>) and evaporated to give 2.0 g of crude 1-adamantyl phenyl-*H*-phosphinate (**1a**) as white solid. The 1-adamantyl phenyl-*H*-phosphinate (**1a**) content of the crude product was 85% according to <sup>31</sup>P NMR.

2.0 g of the Crude product [*c.a.* 6.2 mmol of **1a**] and 4.35 g (6.2 mmol) of 1-naphthyl-spiro-TADDOL [(*R,R*)-**2e**] were dissolved in 33 mL of hot toluene, and then 33 mL of hexane was added. Colorless crystalline diastereomeric complex of (*R*)-**1a**·(*R,R*)-**2e** appeared immediately. After standing at 25°C for 3 hours, the crystals were separated by filtration, washed with 11 mL of hexane to give 2.54 g (2.6 mmol) of (*R*)-**1a**·(*R,R*)-**2e** with a *de* of 83%. The diastereomeric complex (*R*)-**1a**·(*R,R*)-**2e** was purified by recrystallization from a mixture of 33 mL of toluene and 33 mL of hexane according to the procedure described above to afford 1.94 g (63%) of the (*R*)-**1a**·(*R,R*)-**2e** with a *de* of 99%.

The resulting crystalline diastereomer (*R*)-**1a**·(*R,R*)-**2e** (1.94 g) was dissolved in 8.4 mL of hot ethanol. Colorless crystalline complex of [(*R,R*)-**2e**]·EtOH appeared immediately. After standing at 25°C for 16 hours, the crystals were separated by filtration, washed with 1.4 mL of ethanol to give 1.31 g (1.86 mmol) of [(*R,R*)-**2e**]·EtOH. The remaining mother liquor was evaporated, redissolved in DCM, and filtered through a small plug of silica gel with DCM, to elute the remaining (*R,R*)-**2e**. Then, the column was washed with DCM – MeOH 95:5, to give 0.52 g (61%) of (*R*)-1-admantyl phenyl-*H*-phosphinate [(*R*)-**1a**] with an *ee* of 99%.

The mother liquor of the original resolution procedure was evaporated to give 4.89 g of the (*S*)-**1a**·(*R,R*)-**2e** diastereomer with a *de* of 60%. The crystals were dissolved in 18 mL of hot ethanol. Colorless crystalline complex of [(*R,R*)-**2e**]·EtOH appeared immediately. After standing at 25°C for 16 hours, crystals were separated by filtration, washed with 4.0 mL of ethanol to give 2.90 g (4.11 mmol) of [(*R,R*)-**2e**]·EtOH. The resulting mother liquid was evaporated, redissolved in DCM, and filtered on a small plug of silica gel with DCM, to elute the remaining [(*R,R*)-**2e**]. Then the silica gel was washed with DCM – MeOH 95:5, to give 0.97 g (3.51 mmol) of (*S*)-1-adamantyl phenyl-*H*-phosphinate [(*S*)-**1a**] with an *ee* of 60%. The resulting solid was



recrystallized from 1.7 mL of EtOAc at -20°C to give 0.35 g (41%) of (*S*)-1-admantyl phenyl-*H*-phosphinate [(*S*)-**1a**] with an *ee* of 91% (Scheme 4).

## 8. Racemization studies of enantiopure alkyl phenyl-*H*-phosphinates [(*R*)-**1a**, (*R*)-**1b**, (*R*)-**1d** or (*R*)-**1j**]

28 mg (0.10 mmol) of (*R*)-1-Adamantyl phenyl-*H*-phosphinate [(*R*)-**1a**] was dissolved in 0.40 mL of anhydrous toluene in a pressure tube under nitrogen atmosphere. The solution was stirred for 8 days at 25°C or for 3 days at 110°C. Samples were taken from the reaction mixture after 1, 3 and 8 days as it is indicated in Table S8. After taking the given samples, the headspace of the pressure tube was evacuated and filled with nitrogen gas three times.

The thermal racemization of 2-adamantyl-, cyclohexyl- or benzyl phenyl-*H*-phosphinate [(*R*)-**1b**, (*R*)-**1d** or (*R*)-**1j**] was conducted according to this representative procedure. Table S8 contains the results.

**Table S8.** Racemization of optically active alkyl phenyl-*H*-phosphinates [(*R*)-**1a**, (*R*)-**1b**, (*R*)-**1d** or (*R*)-**1j**]

| Entry | RO                           | T (°C) | t (day) | <i>ee</i> <sub>0</sub> (%) <sup>a</sup> | <i>ee</i> (%) <sup>a</sup> |
|-------|------------------------------|--------|---------|-----------------------------------------|----------------------------|
| 1     | 1-AdO ( <b>1a</b> )          | 25     | 1       | 99                                      | 99                         |
| 2     | 1-AdO ( <b>1a</b> )          | 25     | 3       | 99                                      | 99                         |
| 3     | 1-AdO ( <b>1a</b> )          | 25     | 8       | 99                                      | 99                         |
| 4     | 1-AdO ( <b>1a</b> )          | 110    | 3       | 99                                      | 96                         |
| 5     | 2-AdO ( <b>1b</b> )          | 110    | 3       | 98                                      | 93                         |
| 6     | <i>c</i> -HexO ( <b>1d</b> ) | 25     | 1       | 99                                      | 99                         |
| 7     | <i>c</i> -HexO ( <b>1d</b> ) | 25     | 3       | 99                                      | 99                         |
| 8     | <i>c</i> -HexO ( <b>1d</b> ) | 25     | 8       | 99                                      | 99                         |
| 9     | <i>c</i> -HexO ( <b>1d</b> ) | 110    | 3       | 99                                      | decomposition              |
| 10    | BnO ( <b>1j</b> )            | 25     | 1       | 99                                      | 99                         |
| 11    | BnO ( <b>1j</b> )            | 25     | 3       | 99                                      | 99                         |
| 12    | BnO ( <b>1j</b> )            | 25     | 8       | 99                                      | 94                         |
| 13    | BnO ( <b>1j</b> )            | 110    | 3       | 99                                      | decomposition              |

<sup>a</sup>Determined by HPLC using a chiral stationary phase.

## 9. Stereospecific transformations of (*R*)-1-admantyl phenyl-*H*-phosphinate [(*R*)-1a]

### 9.1. Preparation of (*R*)-(2-methoxyphenyl)-phenylphosphine oxide [(*R*)-3a]

Under nitrogen atmosphere, 0.51 mL (1.3 mmol) of *n*-butyllithium (2.5 M hexane solution) was added dropwise to a mixture of 0.14 mL (1.3 mmol) of anisole and 0.19 mL (1.3 mmol) of TMEDA in 1.5 mL of anhydrous Et<sub>2</sub>O over 10 min at 0°C. The reaction mixture was stirred at 25°C for 4 hours. The resulting white suspension was cooled to -50°C, and 0.14 g (0.51 mmol) of (*R*)-1-admantyl phenyl-*H*-phosphinate [(*R*)-1a] in 1.5 mL of anhydrous Et<sub>2</sub>O was added over 15 min. The reaction mixture was stirred at -50°C for 4 hours, then it was allowed to warm to 0°C, and stirred for another 30 min at this temperature. Then 2 mL of saturated NH<sub>4</sub>Cl solution and 2 mL of water were added. Phases were separated, and the aqueous layer was extracted with DCM (3 × 1 mL). The organic layers were combined, dried (Na<sub>2</sub>SO<sub>4</sub>), and evaporated. The crude product was purified by flash column chromatography (silica gel, gradient elution, 100% hexane to 100% EtOAc) to give 105 mg (89%) of (*R*)-(2-methoxyphenyl)-phenylphosphine oxide [(*R*)-3a] with an *ee* of 95% as a white solid.

mp.: 97-98°C (mp<sub>lit</sub>: 101-103°C);<sup>31</sup>[α]<sub>D</sub><sup>25</sup> = +48.8 (*c* = 1.0, CHCl<sub>3</sub>, *ee* = 95%, *R<sub>P</sub>*) ([α]<sub>D</sub><sup>25</sup>(lit) = +40.9 (*c* = 0.91, CHCl<sub>3</sub>, *ee* = 67%, *R<sub>P</sub>*),<sup>4</sup> Chiral HPLC: Phenomenex Lux 5 μm Cellulose-1 column, hexane/ethanol (85:15), *t*<sub>R1</sub> 10.8 min (*S*)-3a, *t*<sub>R2</sub> 15.4 min (*R*)-3a; <sup>31</sup>P{<sup>1</sup>H} NMR (121.5 MHz, CDCl<sub>3</sub>) δ 12.5 (δ<sub>lit</sub> 14.4);<sup>31</sup><sup>1</sup>H NMR (500 MHz, CDCl<sub>3</sub>) δ 8.16 (d, *J* = 499.0, 1H), 7.81-7.70 (m, 3H), 7.54-7.43 (m, 4H), 7.11-7.08 (m, 1H), 6.92-6.89 (m, 1H), 3.77 (s, 3H); <sup>13</sup>C{<sup>1</sup>H} NMR (75.5 MHz, CDCl<sub>3</sub>) δ 160.8 (d, *J* = 3.8), 134.5 (d, *J* = 1.9), 133.2 (d, *J* = 7.1), 132.3 (d, *J* = 104.5), 132.1 (d, *J* = 3.0), 130.6 (d, *J* = 11.8), 128.6 (d, *J* = 13.1), 121.2 (d, *J* = 12.1), 119.6 (d, *J* = 101.9), 110.9 (d, *J* = 6.1), 55.6; HRMS (ESI/TOF) *m/z*: [M + H]<sup>+</sup> Calcd for C<sub>13</sub>H<sub>14</sub>O<sub>2</sub>P 233.0731; Found 233.0733.

### 9.2. Preparation of (*R*)-(2-methoxyphenyl)-methyl-phenylphosphine oxide [(*R*)-3b]

Under nitrogen atmosphere, 0.51 mL (1.3 mmol) of *n*-butyllithium (2.5 M hexane solution) was added dropwise to a mixture of 0.14 mL (1.3 mmol) of anisole and 0.19 mL (1.3 mmol) of TMEDA in 1.5 mL of anhydrous Et<sub>2</sub>O over 10 min at 0°C. The reaction mixture was stirred at

25°C for 4 hours. The resulting white suspension was cooled to -50°C, and 0.14 g (0.51 mmol) of (*R*)-1-admantyl phenyl-*H*-phosphinate [(*R*)-**1a**] in 1.5 mL of anhydrous Et<sub>2</sub>O was added over 15 min. The reaction mixture was stirred at -50°C for 4 hours, then it was allowed to warm to 0°C, and stirred for another 30 min at this temperature. Then 0.13 mL of MeI in 1.5 mL of mL of anhydrous Et<sub>2</sub>O was added over 10 min at 0°C, and the reaction mixture was stirred for another 30 min at the same temperature. Then 2 mL of saturated NH<sub>4</sub>Cl solution and 2 mL of water were added. Phases were separated, and the aqueous layer was extracted with DCM (3 × 1 mL). The organic layers were combined, dried (Na<sub>2</sub>SO<sub>4</sub>), and evaporated. The crude product was purified by flash column chromatography (silica gel, gradient elution, 100% hexane to 100% EtOAc) to give 95 mg (75%) of (*R*)-(2-methoxyphenyl)-methyl-phenylphosphine oxide [(*R*)-**3b**] with an *ee* of 93% as a white solid. The enantiomeric mixture of (*R*)-**3b** was dissolved in 95 μL of EtOAc and cooled to -78°C for 3 hours. The crystals were separated by filtration to give 17 mg of (*R*)-(2-methoxyphenyl)-methyl-phenylphosphine oxide [(*R*)-**3b**] with an *ee* of 75%. The mother liquid was evaporated to give 78 mg (62%) of (*R*)-(2-methoxyphenyl)-methyl-phenylphosphine oxide [(*R*)-**3b**] with an *ee* of 97% as a white solid.

mp.: 82-84°C (mp<sub>lit.</sub>: 81-83°C);<sup>32</sup> [α]<sub>D</sub><sup>25</sup> = +20.8 (*c* = 1.0, CHCl<sub>3</sub>, *ee* = 97%, *R*) ([α]<sub>D</sub><sup>25</sup>(lit) = +30.4 (*c* = 0.55, CHCl<sub>3</sub>, *ee* = 96%, *R*),<sup>32</sup> Chiral HPLC: Kromasil 5-Amycoat column, hexane/ethanol (85:15), *t*<sub>R1</sub> 11.5 min (*S*)-**3b**, *t*<sub>R2</sub> 14.5 min (*R*)-**3b**; <sup>31</sup>P{<sup>1</sup>H} NMR (121.5 MHz, CDCl<sub>3</sub>) δ 28.5 (δ<sub>lit</sub> 29.4);<sup>32</sup> <sup>1</sup>H NMR (500 MHz, CDCl<sub>3</sub>) δ 7.97 – 7.93 (m, 1H), 7.75 – 7.71 (m, 2H), 7.51 – 7.39 (m, 4H), 7.11 – 7.08 (m, 1H), 6.89 – 6.86 (m, 1H), 3.72 (s, 3H), 2.07 (d, *J* = 14.1, 3H); <sup>13</sup>C{<sup>1</sup>H} NMR (125.8 MHz, CDCl<sub>3</sub>) δ 160.0 (d, *J* = 4.2), 135.1 (d, *J* = 103.9), 134.0 (d, *J* = 3.6), 134.0, 131.4 (d, *J* = 2.8), 130.4 (d, *J* = 10.1), 128.3 (d, *J* = 12.2), 121.5 (d, *J* = 100.2), 121.2 (d, *J* = 11.0), 111.0 (d, *J* = 6.5), 55.4, 16.3 (d, *J* = 75.2); HRMS (ESI/TOF) *m/z*: [M + H]<sup>+</sup> Calcd for C<sub>14</sub>H<sub>16</sub>O<sub>2</sub>P 247.0888; Found 247.0883.

### 9.3. Preparation of (*R*)-*c*-hexyl-(2-methoxyphenyl)-methylphosphine-oxide [(*R*)-**3c**]

To 122 mg (0.49 mmol) of (*R*)-phenyl-(2-methoxyphenyl)-methylphosphine oxide [(*R*)-**3b**] (*ee* 97%) in 30 mL of MeOH was added 50 mg of 5% Rh/C catalyst, then (*R*)-**3b** was hydrogenated in a 80 mL stainless steel autoclave equipped with a magnetic stirrer (stirring speed: 1200 rpm), at 20 bar and 95°C for 24 h. After finishing the hydrogen uptake, the catalyst was filtered and washed with MeOH (2×5 mL). After removing the solvent under *vacuum*, the crude product was purified by column chromatography (silica gel, gradient elution, acetone to acetone - 2-

PrOH=90:10) to afford 100 mg (80%) of (*R*)-cyclohexyl-(2-methoxyphenyl)-methylphosphine oxide [(*R*)-**3c**] with an *ee* of 96% a dense oil.

$[\alpha]_{\text{D}}^{25} = +30.0$  ( $c = 2.4$ ,  $\text{CHCl}_3$ ,  $ee = 96\%$ ,  $R_{\text{p}}$ ) ( $[\alpha]_{\text{D}}^{25}(\text{lit}) = +63.3$  ( $c = 0.5$ ,  $\text{MeOH}$ ,  $R_{\text{p}}$ ),<sup>33</sup> Chiral HPLC: Phenomenex Lux 5  $\mu\text{m}$  Amylose-2 column, hexane/ethanol (85:15),  $t_{\text{R1}}$  12.1 min (*S*)-**3c**,  $t_{\text{R2}}$  16.9 min (*R*)-**3c**;  $^{31}\text{P}\{^1\text{H}\}$  NMR (121.5 MHz,  $\text{CDCl}_3$ )  $\delta$  40.5;  $^1\text{H}$  NMR (500 MHz,  $\text{CDCl}_3$ )  $\delta$  7.95 – 7.91 (m, 1H), 7.50 – 7.46 (m, 1H), 7.10 – 7.07 (m, 1H), 6.90 (dd,  $J = 8.3, 5.1$ , 1H), 3.86 (s, 3H), 1.98 – 1.92 (m, 2H), 1.90 – 1.85 (m, 1H), 1.72 – 1.55 (m, 6H), 1.39 – 1.11 (m, 5H);  $^{13}\text{C}\{^1\text{H}\}$  NMR (75.5 MHz,  $\text{CDCl}_3$ )  $\delta$  159.3 (d,  $J = 4.8$ ), 134.9 (d,  $J = 4.5$ ), 133.4 (d,  $J = 2.2$ ), 121.1 (d,  $J = 10.1$ ), 120.4 (d,  $J = 90.4$ ), 110.3 (d,  $J = 6.5$ ), 55.3, 38.0 (d,  $J = 73.1$ ), 26.4 (d,  $J = 13.8$ ), 25.8 (d,  $J = 1.6$ ), 24.9 (d,  $J = 3.3$ ), 24.5 (d,  $J = 3.1$ ), 13.8 (d,  $J = 68.8$ ); HRMS (ESI/TOF)  $m/z$ :  $[\text{M} + \text{H}]^+$  Calcd for  $\text{C}_{14}\text{H}_{22}\text{O}_2\text{P}$  253.1357; Found 253.1354.

#### 9.4. Preparation of (*R*)-1-adamantyl-phenylphosphonamidate [(*R*)-**3d**]

0.50 g (1.8 mmol) of (*R*)-1-adamantyl phenyl-*H*-phosphinate [(*R*)-**1a**] was dissolved in 10 mL of MeCN under nitrogen atmosphere, it was cooled to 0°C. 2.3 mL of  $\text{CCl}_4$ , 0.63 mL (4.5 mmol) of  $\text{NEt}_3$  were added in one portion, which was followed by the controlled addition of 1.1 mL of  $\text{NH}_4\text{OH}$  solution (28%) over 5 min each at 0°C. The reaction was stirred at 0°C for 1 hour, then it was allowed to warm to 25°C and stirred for 16 hours. 10 mL of Water was added, the phases were separated, and the aqueous layer was extracted with EtOAc (3  $\times$  10 mL). The organic layers were combined, dried ( $\text{Na}_2\text{SO}_4$ ), and evaporated. The crude product was purified by flash column chromatography (silica gel, gradient elution, EtOAc to EtOAc – MeOH 98:2) to give 0.47 g (90%) (*R*)-1-adamantyl-phenylphosphonamidate [(*R*)-**3d**] with an *ee* of 99% as a white solid.

mp.: 148-150°C;  $[\alpha]_{\text{D}}^{25} = -15.4$  ( $c = 1.0$ ,  $\text{CHCl}_3$ ,  $ee = 99\%$ ,  $R_{\text{p}}$ ); Chiral HPLC: Phenomenex Lux 5  $\mu\text{m}$  Amylose-2 column, hexane/ethanol (50:50),  $t_{\text{R1}}$  6.1 min (*R*)-**3d**,  $t_{\text{R2}}$  10.7 min (*S*)-**3d**;  $^{31}\text{P}\{^1\text{H}\}$  NMR (202.5 MHz,  $\text{CDCl}_3$ )  $\delta$  18.0;  $^1\text{H}$  NMR (500 MHz,  $\text{CDCl}_3$ )  $\delta$  7.82 (dd,  $J = 13.2, 7.4$ , 2H), 7.49 – 7.39 (m, 3H), 2.94 (bs, 2H), 2.14 – 2.10 (m, 9H), 1.61 (bs, 6H);  $^{13}\text{C}\{^1\text{H}\}$  NMR (125.8 MHz,  $\text{CDCl}_3$ )  $\delta$  135.0 (d,  $J = 174.4$ ), 131.4 (d,  $J = 3.1$ ), 131.1 (d,  $J = 10.1$ ), 128.3 (d,  $J = 14.3$ ), 82.4 (d,  $J = 8.2$ ), 44.4 (d,  $J = 4.1$ ), 35.9, 31.3; HRMS (ESI/TOF)  $m/z$ :  $[\text{M} + \text{H}]^+$  Calcd for  $\text{C}_{16}\text{H}_{23}\text{NO}_2\text{P}$  292.1466; Found 292.1463.

## 9.5. Preparation of (*R*)-*N*-(1-adamantyl-phenylphosphonyl)-2,4,6-triisopropylbenzenesulfonamide [(*R*)-3e]

Under argon atmosphere, 0.12 g of 60% (w/w %) NaH dispersion (74 mg of NaH, 3.1 mmol) was washed with anhydrous THF (2 × 2.0 mL), 2.0 mL of anhydrous THF was added then. To this suspension, 0.30 g (1.0 mmol) of (*R*)-1-adamantyl-phenylphosphonamidate [(*R*)-3d] in 2.0 mL of anhydrous THF was added dropwise over 10 min at 0 °C, and the reaction mixture was stirred for 45 min at this temperature. Then, 0.47 g (1.6 mmol) of 2,4,6-triisopropylbenzenesulfonyl chloride in 2.0 mL of anhydrous THF was added dropwise over 10 min at 0 °C, and the reaction mixture was stirred for 20 min at this temperature. The reaction mixture was allowed to warm to 25 °C, and it was stirred for 16 hours. Then, 6 mL of saturated NH<sub>4</sub>Cl solution and 4 mL of water were added. Phases were separated, and the aqueous layer was extracted with DCM (3 × 10 mL). The organic layers were combined, dried (Na<sub>2</sub>SO<sub>4</sub>), and evaporated. The crude product was purified by flash column chromatography (silica gel, gradient elution, DCM to DCM – MeOH 90:10) to give 0.47 g (84%) of (*R*)-*N*-(1-adamantyl-phenylphosphonyl)-2,4,6-triisopropylbenzenesulfonamide [(*R*)-3e] as a white solid.

mp.: 88-89°C; [ $\alpha$ ]<sub>D</sub><sup>25</sup> = +6.8 (*c* = 0.6, CHCl<sub>3</sub>, *R*); <sup>31</sup>P{<sup>1</sup>H} NMR (202.5 MHz, CDCl<sub>3</sub>) δ 7.2; <sup>1</sup>H NMR (500 MHz, CDCl<sub>3</sub>) δ 7.72 (dd, *J* = 14.1, 7.6, 2H), 7.35 (t, *J* = 7.4, 1H), 7.24 – 7.20 (m, 2H), 7.04 (s, 2H), 4.22 – 4.10 (m, 2H), 2.89 – 2.81 (m, 1H), 1.99 (bs, 9H), 1.49 (bs, 6H), 1.22 (d, *J* = 6.9, 6H), 1.17 – 1.15 (m, 12H); <sup>13</sup>C{<sup>1</sup>H} NMR (125.8 MHz, CDCl<sub>3</sub>) δ 152.7, 149.6, 135.0, 131.9 (d, *J* = 3.2), 131.7 (d, *J* = 10.7), 128.6 (d, *J* = 102.0), 127.9 (d, *J* = 15.6), 123.4, 85.9 (d, *J* = 8.9), 44.0 (d, *J* = 4.1), 35.7, 34.2, 31.3, 29.7, 24.9, 24.7, 23.7, 23.7; HRMS (ESI/TOF) *m/z*: [M + H]<sup>+</sup> Calcd for C<sub>31</sub>H<sub>45</sub>NO<sub>4</sub>PS 558.2807; Found 558.2802.

## 9.6. Preparation of (*S*)-1-adamantyl-phenylphosphonothioic acid [(*S*)-3f]

0.38 mL (2.7 mmol) of NEt<sub>3</sub> and 0.13 g (0.51 mmol) of S<sub>8</sub> were added to a solution of 0.75 g (2.7 mmol) of (*R*)-1-admantyl phenyl-*H*-phosphinate [(*R*)-1a] in 4 mL diethyl-ether at 25°C. The reaction was stirred for 16 hours under nitrogen atmosphere at room temperature. Then the solvent was evaporated, and the resulting salt was re-dissolved in 8 mL of EtOAc. The remaining sulfur was filtered and washed with EtOAc (2 × 1 mL). In order to liberate the corresponding phosphonothioic acid [(*S*)-3f], 6 mL of 1M NaHSO<sub>4</sub> was added to the EtOAc solution. Phases were separated, and the aqueous layer was extracted with EtOAc (3 × 6 mL).

The organic layers were combined, dried ( $\text{Na}_2\text{SO}_4$ ), and evaporated to give 0.75 g (90%) of (*S*)-1-adamantyl-phenylphosphonothioic acid [(*S*)-**3f**] with an *ee* of 99% as a yellow solid.

mp.: 87-89°C;  $[\alpha]_{\text{D}}^{25} = -5.6$  ( $c = 1.1$ ,  $\text{CHCl}_3$ , *ee* = 99%,  $S_{\text{p}}$ ); The enantiomeric excess of (*S*)-**3f** was determined by  $^{31}\text{P}$  NMR using 6.2 mg (20  $\mu\text{mol}$ ) of the analyte, 3.9  $\mu\text{L}$  (30  $\mu\text{mol}$ ) (*S*)-1-phenylethylamine as CSA and 750  $\mu\text{L}$   $\text{CDCl}_3$  as solvent;  $^{31}\text{P}\{^1\text{H}\}$  NMR (121.5 MHz,  $\text{CDCl}_3$ )  $\delta$  69.2;  $^1\text{H}$  NMR (500 MHz,  $\text{CDCl}_3$ )  $\delta$  7.92 – 7.87 (m, 2H), 7.49 – 7.46 (m, 1H), 7.43 – 7.39 (m, 2H), 7.05 (bs, 1H), 2.26 – 2.19 (m, 6H), 2.15 (bs, 3H), 1.65 – 1.58 (m, 6H);  $^{13}\text{C}\{^1\text{H}\}$  NMR (125.8 MHz,  $\text{CDCl}_3$ )  $\delta$  136.8 (d,  $J = 156.9$ ), 131.6 (d,  $J = 3.2$ ), 130.3 (d,  $J = 11.9$ ), 128.2 (d,  $J = 15.4$ ), 85.2 (d,  $J = 10.4$ ), 44.0 (d,  $J = 4.2$ ), 35.9, 31.4; HRMS (ESI/TOF)  $m/z$ :  $[\text{M} + \text{H}]^+$  Calcd for  $\text{C}_{16}\text{H}_{22}\text{O}_2\text{PS}$  309.1078; Found 309.1074.

## 10. Application of (*S*)-1-adamantyl-phenylphosphonothioic acid [(*S*)-**3f**] as NMR chiral solvating agent

5.8 mg (19  $\mu\text{mol}$ ) of (*S*)-1-adamantyl-phenylphosphonothioic acid [(*S*)-**3f**] and 3.0  $\mu\text{L}$  (19  $\mu\text{mol}$ ) of 1-naphthylethylamine (**6**) were dissolved in 0.75 mL of  $\text{CDCl}_3$  in an NMR tube, then the  $^1\text{H}$  NMR of the mixture was measured. The same procedure was used in case of the other analytes (**7-13**).

In case of **6** no baseline separation was achieved in toluene- $d_8$ , acetone- $d_6$ , DMSO- $d_6$ , EtOH- $d_6$  and MeOH- $d_4$ . However, it was found that  $\text{CD}_3\text{CN}$ ,  $\text{CD}_2\text{Cl}_2$  and  $\text{CDCl}_3$  can be used as solvents. The amount of the (*S*)-**3f** was also investigated, and it was found that 1 – 1.5 eq. of (*S*)-**3f** at 25 mM in  $\text{CDCl}_3$  should be used for the best peak separation. Tables S9 and S10 contain selected regions of the  $^1\text{H}$  NMR spectra.

**Table S9.** The use of (*S*)-1-adamantyl-phenylphosphonothioic acid [(*S*)-**3f**] as chiral NMR solvating agent for 1-naphthylethylamine (**6**) and amino alcohols (**7-10**).

| Entry | Analyte                                                                             | <sup>1</sup> H of analyte                                                           | <sup>1</sup> H of analyte in the presence of 1 eq. of ( <i>S</i> )- <b>3f</b>        | Δδ (ppm) |
|-------|-------------------------------------------------------------------------------------|-------------------------------------------------------------------------------------|--------------------------------------------------------------------------------------|----------|
| 1     | 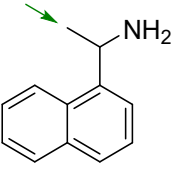   |    |    | 0.053    |
| 2     |    |    |    | 0.131    |
|       |                                                                                     |   |   | 0.069    |
| 3     |  |  |  | 0.107    |
| 4     |  |  |  | 0.064    |
| 5     |  |  |  | 0.083    |

**Table S10.** The use of (*S*)-1-adamantyl-phenylphosphonothioic acid [(*S*)-**3f**] as chiral NMR solvating agent for secondary phosphine oxides (**11-13**).

| Entry | Analyte                                                                                         | <sup>1</sup> H of analyte                                                          | <sup>1</sup> H of analyte in the presence of 1 eq. of ( <i>S</i> )- <b>3f</b>       | Δδ (ppm) |
|-------|-------------------------------------------------------------------------------------------------|------------------------------------------------------------------------------------|-------------------------------------------------------------------------------------|----------|
| 1     | 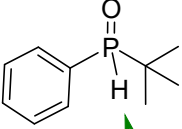<br><b>11</b>  |   |   | 0.033    |
| 2     | <br><b>12</b>  |   |   | 0.029    |
| 3     | <br><b>13</b> |  |  | 0.030    |



## 11.X-ray measurements

In all instances, X-ray quality crystals were prepared by slowly diffusing hexane to the toluene solution of the corresponding diastereomeric complex.

Crystallographic information of the measured crystals:

Crystal structure data are deposited at the Cambridge Crystallographic Data Centre under CCDC 2143598-2143607.

[(*R*)-**1a**·(*R,R*)-**2e**]: C<sub>73</sub> H<sub>71</sub> O<sub>6</sub> P, *Fwt.*: 1075.26, colourless, chunk, size: 0.50 x 0.40 x 0.40 mm, orthorhombic, space group *P* 2<sub>1</sub> 2<sub>1</sub> 2<sub>1</sub>, *a* = 10.3422(7)Å, *b* = 23.1822(17)Å, *c* = 23.8390(18)Å,  $\alpha = 90^\circ$ ,  $\beta = 90^\circ$ ,  $\gamma = 90^\circ$ , *V* = 5716(1)Å<sup>3</sup>, *T* = 103(2)K, *Z* = 4, *F*(000) = 2288, *D*<sub>x</sub> = 1.250 Mg/m<sup>3</sup>,  $\mu$  0.104mm<sup>-1</sup>.

A crystal of [(*R*)-**1a**·(*R,R*)-**2e**] was mounted on a glass fiber. Cell parameters were determined by least-squares using 40690 ( $3.11 \leq \theta \leq 27.41^\circ$ ) reflections.

Intensity data were collected on a(n) Rigaku RAXIS-RAPID II diffractometer (monochromator; Mo-*K*α radiation,  $\lambda = 0.71075\text{Å}$ ) at 103(2) K in the range  $3.108 \leq \theta \leq 25.350^\circ$ .

A total of 75348 reflections were collected of which 10434 were unique [*R*(int) = 0.1701, *R*(σ) = 0.0946]; intensities of 6380 reflections were greater than 2σ(*I*). Completeness to  $\theta = 0.997$ .

An empirical absorption correction was applied to the data (the minimum and maximum transmission factors were 0.7230 and 1.0000).

The structure was solved by direct methods<sup>10,11</sup> (and subsequent difference syntheses).

Anisotropic full-matrix least-squares refinement<sup>12</sup> on *F*<sup>2</sup> for all non-hydrogen atoms yielded *R*<sub>1</sub> = 0.0866 and *wR*<sup>2</sup> = 0.1287 for 1332 [*I* > 2σ(*I*)] and *R*<sub>1</sub> = 0.1501 and *wR*<sup>2</sup> = 0.1479 for all (10434) intensity data, (number of parameters = 699, goodness-of-fit = 1.103, the maximum and mean shift/esd is 0.002 and 0.000). The absolute structure parameter is 0.11(9). (Friedel coverage: 0.803, Friedel fraction max.: 0.999, Friedel fraction full: 0.999).

The maximum and minimum residual electron density in the final difference map was 0.26 and -0.18e.Å<sup>-3</sup>.

The weighting scheme applied was  $w = 1/[\sigma^2(F_o^2) + (0.02993.1546P)^2 + 3.1546P]$  where  $P = (F_o^2 + 2F_c^2)/3$ .

[(*R*)-**1b**·(*R,R*)-**2e**]: C<sub>73</sub> H<sub>71</sub> O<sub>6</sub> P, *Fwt.*: 1075.26, colourless, needle, size: 0.50 x 0.10 x 0.10 mm, orthorhombic, space group *P* 2<sub>1</sub> 2<sub>1</sub> 2<sub>1</sub>, *a* = 10.2809(13)Å, *b* = 22.954(3)Å, *c* = 23.721(3)Å,  $\alpha =$

$90^\circ$ ,  $\beta = 90^\circ$ ,  $\gamma = 90^\circ$ ,  $V = 5597.8(12)\text{\AA}^3$ ,  $T = 103(2)\text{K}$ ,  $Z = 4$ ,  $F(000) = 2288$ ,  $D_x = 1.276\text{ Mg/m}^3$ ,  $\mu = 0.106\text{mm}^{-1}$ .

A crystal of [(R)-1b·(R,R)-2e] was mounted on a glass fiber. Cell parameters were determined by least-squares using 62643 ( $3.13 \leq \theta \leq 25.29^\circ$ ) reflections.

Intensity data were collected on a(n) Rigaku RAXIS-RAPID II diffractometer (monochromator; Mo- $K\alpha$  radiation,  $\lambda = 0.71075\text{\AA}$ ) at 103(2) K in the range  $3.129 \leq \theta \leq 23.532^\circ$ .

A total of 114437 reflections were collected of which 8286 were unique [ $R(\text{int}) = 0.2025$ ,  $R(\sigma) = 0.0883$ ]; intensities of 6257 reflections were greater than  $2\sigma(I)$ . Completeness to  $\theta = 0.996$ .

A numerical absorption correction was applied to the data (the minimum and maximum transmission factors were 0.988724 and 0.998178).

The structure was solved by direct methods<sup>10,11</sup> (and subsequent difference syntheses).

Anisotropic full-matrix least-squares refinement<sup>12</sup> on  $F^2$  for all non-hydrogen atoms yielded  $R_1 = 0.0743$  and  $wR^2 = 0.1356$  for 1332 [ $I > 2\sigma(I)$ ] and  $R_1 = 0.1044$  and  $wR^2 = 0.1461$  for all (8286) intensity data, (number of parameters = 688, goodness-of-fit = 1.072, the maximum and mean shift/esd is 0.000 and 0.000). The absolute structure parameter is -0.03(8). (Friedel coverage: 0.790, Friedel fraction max.: 0.998, Friedel fraction full: 0.998).

The maximum and minimum residual electron density in the final difference map was 0.33 and  $-0.19\text{e}\cdot\text{\AA}^{-3}$ .

The weighting scheme applied was  $w = 1/[\sigma^2(F_o^2) + (0.05841 \cdot 2.195P)^2 + 1.2195P]$  where  $P = (F_o^2 + 2F_c^2)/3$ .

[(R)-1c·(R,R)-2e]:  $\text{C}_{68}\text{H}_{65}\text{O}_6\text{P}$ ,  $F_{\text{wt.}}: 1009.17$ , colourless, block, size: 0.50 x 0.10 x 0.10 mm, orthorhombic, space group  $P 2_1 2_1 2_1$ ,  $a = 10.2844(10)\text{\AA}$ ,  $b = 22.511(3)\text{\AA}$ ,  $c = 22.695(2)\text{\AA}$ ,  $\alpha = 90^\circ$ ,  $\beta = 90^\circ$ ,  $\gamma = 90^\circ$ ,  $V = 5254(1)\text{\AA}^3$ ,  $T = 103(2)\text{K}$ ,  $Z = 4$ ,  $F(000) = 2144$ ,  $D_x = 1.276\text{ Mg/m}^3$ ,  $\mu = 0.109\text{mm}^{-1}$ .

A crystal of [(R)-1c·(R,R)-2e] was mounted on a fiber. Cell parameters were determined by least-squares using 30821 ( $3.24 \leq \theta \leq 25.33^\circ$ ) reflections.

Intensity data were collected on a(n) Rigaku RAXIS-RAPID II diffractometer (monochromator; Mo- $K\alpha$  radiation,  $\lambda = 0.71075\text{\AA}$ ) at 103(2) K in the range  $3.228 \leq \theta \leq 21.964^\circ$ .

A total of 43009 reflections were collected of which 6392 were unique [ $R(\text{int}) = 0.1544$ ,  $R(\sigma) = 0.0863$ ]; intensities of 4811 reflections were greater than  $2\sigma(I)$ . Completeness to  $\theta = 0.996$ .

A numerical absorption correction was applied to the data (the minimum and maximum transmission factors were 0.991439 and 0.996990).

The structure was solved by direct methods<sup>10,11</sup> (and subsequent difference syntheses). Anisotropic full-matrix least-squares refinement<sup>12</sup> on  $F^2$  for all non-hydrogen atoms yielded  $R_1 = 0.0668$  and  $wR^2 = 0.1191$  for 1332 [ $I > 2\sigma(I)$ ] and  $R_1 = 0.0965$  and  $wR^2 = 0.1306$  for all (6392) intensity data, (number of parameters = 713, goodness-of-fit = 1.065, the maximum and mean shift/esd is 0.001 and 0.000). The absolute structure parameter is -0.05(12). (Friedel coverage: 0.776, Friedel fraction max.: 0.999, Friedel fraction full: 0.999).

The maximum and minimum residual electron density in the final difference map was 0.21 and -0.18 e.Å<sup>-3</sup>.

The weighting scheme applied was  $w = 1/[\sigma^2(F_o^2) + (0.03223.4327P)^2 + 3.4327P]$  where  $P = (F_o^2 + 2F_c^2)/3$ .

[(*R*)-1*d*·(*R*,*R*)-2*e*]: C<sub>68.5</sub> H<sub>66.5</sub> O<sub>6</sub> P, *F*<sub>wt.</sub>: 1017.04, colourless, chunk, size: 0.45 x 0.15 x 0.15 mm, orthorhombic, space group  $P 2_1 2_1 2_1$ ,  $a = 10.2836(19)\text{Å}$ ,  $b = 23.126(4)\text{Å}$ ,  $c = 23.684(4)\text{Å}$ ,  $\alpha = 90^\circ$ ,  $\beta = 90^\circ$ ,  $\gamma = 90^\circ$ ,  $V = 5633(2)\text{Å}^3$ ,  $T = 103(2)\text{K}$ ,  $Z = 4$ ,  $F(000) = 2163$ ,  $D_x = 1.199\text{ Mg/m}^3$ ,  $\mu = 0.102\text{mm}^{-1}$ .

A crystal of [(*R*)-1*d*·(*R*,*R*)-2*e*] was mounted on a fiber. Cell parameters were determined by least-squares using 126744 ( $3.185 \leq \theta \leq 27.46^\circ$ ) reflections.

Intensity data were collected on a(n) Rigaku RAXIS-RAPID II diffractometer (monochromator; Mo- $K\alpha$  radiation,  $\lambda = 0.71075\text{Å}$ ) at 103(2) K in the range  $3.124 \leq \theta \leq 21.491^\circ$ . A total of 192117 reflections were collected of which 6451 were unique [ $R(\text{int}) = 0.1849$ ,  $R(\sigma) = 0.0489$ ]; intensities of 5814 reflections were greater than  $2\sigma(I)$ . Completeness to  $\theta = 0.996$ . A numerical absorption correction was applied to the data (the minimum and maximum transmission factors were 0.990194 and 0.996229).

The structure was solved by direct methods<sup>10,11</sup> (and subsequent difference syntheses).

Anisotropic full-matrix least-squares refinement<sup>12</sup> on  $F^2$  for all non-hydrogen atoms yielded  $R_1 = 0.0679$  and  $wR^2 = 0.1359$  for 1332 [ $I > 2\sigma(I)$ ] and  $R_1 = 0.0773$  and  $wR^2 = 0.1398$  for all (6451) intensity data, (number of parameters = 696, goodness-of-fit = 1.154, the maximum and mean shift/esd is 0.000 and 0.000). The absolute structure parameter is 0.17(7). (Friedel coverage: 0.775, Friedel fraction max.: 0.999, Friedel fraction full: 0.999).

The maximum and minimum residual electron density in the final difference map was 0.31 and -0.21 e.Å<sup>-3</sup>.

The weighting scheme applied was  $w = 1/[\sigma^2(F_o^2) + (0.05842.3001P)^2 + 2.3001P]$  where  $P = (F_o^2 + 2F_c^2)/3$ .

[(*R*<sub>P</sub>)-1*e*·(*R*,*R*)-2*e*]: C<sub>66</sub> H<sub>67</sub> O<sub>6</sub> P, *F*<sub>w</sub>*t.*: 987.16, colourless, needle, size: 0.40 x 0.07 x 0.04 mm, orthorhombic, space group *P* 2<sub>1</sub> 2<sub>1</sub> 2<sub>1</sub>, *a* = 10.1392(9)Å, *b* = 21.9837(19)Å, *c* = 23.902(2)Å,  $\alpha = 90^\circ$ ,  $\beta = 90^\circ$ ,  $\gamma = 90^\circ$ , *V* = 5328(1)Å<sup>3</sup>, *T* = 103(2)K, *Z* = 4, *F*(000) = 2104, *D*<sub>x</sub> = 1.231 Mg/m<sup>3</sup>,  $\mu$  0.106mm<sup>-1</sup>.

A crystal of [(*R*<sub>P</sub>)-1*e*·(*R*,*R*)-2*e*] was mounted on a fiber. Cell parameters were determined by least-squares using 47728 ( $3.16 \leq \theta \leq 27.42^\circ$ ) reflections.

Intensity data were collected on a(n) Rigaku RAXIS-RAPID II diffractometer (monochromator; Mo-*K*α radiation,  $\lambda = 0.71075\text{Å}$ ) at 103(2) K in the range  $3.158 \leq \theta \leq 25.350^\circ$ .

A total of 114772 reflections were collected of which 9729 were unique [*R*(int) = 0.3192, *R*(σ) = 0.1354]; intensities of 6069 reflections were greater than 2σ(*I*). Completeness to  $\theta = 0.997$ .

An empirical absorption correction was applied to the data (the minimum and maximum transmission factors were 0.4445 and 1.0000).

The structure was solved by direct methods<sup>10,11</sup> (and subsequent difference syntheses).

Anisotropic full-matrix least-squares refinement<sup>12</sup> on *F*<sup>2</sup> for all non-hydrogen atoms yielded *R*<sub>1</sub> = 0.1080 and *wR*<sup>2</sup> = 0.1278 for 1332 [*I* > 2σ(*I*)] and *R*<sub>1</sub> = 0.1706 and *wR*<sup>2</sup> = 0.1464 for all (9729) intensity data, (number of parameters = 711, goodness-of-fit = 1.118, the maximum and mean shift/esd is 0.000 and 0.000). The absolute structure parameter is -0.05(13). (Friedel coverage: 0.799, Friedel fraction max.: 0.999, Friedel fraction full: 0.999).

The maximum and minimum residual electron density in the final difference map was 0.22 and -0.25e.Å<sup>-3</sup>.

The weighting scheme applied was  $w = 1/[\sigma^2(F_o^2) + (0.01353 \cdot 9024P)^2 + 3.9024P]$  where  $P = (F_o^2 + 2F_c^2)/3$ .

[(*R*)-1*f*·(*R*,*R*)-2*e*]: C<sub>70</sub> H<sub>69</sub> O<sub>6</sub> P, *F*<sub>w</sub>*t.*: 1037.22, colourless, block, size: 0.400 x 0.250 x 0.200 mm, orthorhombic, space group *P* 2<sub>1</sub> 2<sub>1</sub> 2<sub>1</sub>, *a* = 10.2103(10)Å, *b* = 22.6629(18)Å, *c* = 23.531(2)Å,  $\alpha = 90^\circ$ ,  $\beta = 90^\circ$ ,  $\gamma = 90^\circ$ , *V* = 5445(1)Å<sup>3</sup>, *T* = 103(2)K, *Z* = 4, *F*(000) = 2208, *D*<sub>x</sub> = 1.265 Mg/m<sup>3</sup>,  $\mu$  0.107mm<sup>-1</sup>.

A crystal of [(*R*)-1*f*·(*R*,*R*)-2*e*] was mounted on a fiber. Cell parameters were determined by least-squares using 39803 ( $3.16 \leq \theta \leq 27.475^\circ$ ) reflections.

Intensity data were collected on a(n) Rigaku RAXIS-RAPID II diffractometer (monochromator; Mo-*K*α radiation,  $\lambda = 0.71075\text{Å}$ ) at 103(2) K in the range  $3.159 \leq \theta \leq 25.351^\circ$ .

A total of 61727 reflections were collected of which 9769 were unique [*R*(int) = 0.1373, *R*(σ)

= 0.0915]; intensities of 7176 reflections were greater than  $2\sigma(I)$ . Completeness to  $\theta = 0.981$ . A(n) numerical absorption correction was applied to the data (the minimum and maximum transmission factors were 0.988662 and 0.996401).

The structure was solved by direct methods<sup>10,11</sup> (and subsequent difference syntheses).

Anisotropic full-matrix least-squares refinement<sup>12</sup> on  $F^2$  for all non-hydrogen atoms yielded  $R_1 = 0.0653$  and  $wR^2 = 0.1101$  for 1332 [ $I > 2\sigma(I)$ ] and  $R_1 = 0.1001$  and  $wR^2 = 0.1207$  for all (9769) intensity data, (number of parameters = 701, goodness-of-fit = 1.031, the maximum and mean shift/esd is 0.001 and 0.000). The absolute structure parameter is 0.02(7). (Friedel coverage: 0.798, Friedel fraction max.: 0.980, Friedel fraction full: 0.980).

The maximum and minimum residual electron density in the final difference map was 0.24 and  $-0.29 \text{ e. \AA}^{-3}$ .

The weighting scheme applied was  $w = 1/[\sigma^2(F_o^2) + (0.04421.3054P)^2 + 1.3054P]$  where  $P = (F_o^2 + 2F_c^2)/3$ .

[(*S*)-**1h**·(*R,R*)-**2e**]: C<sub>60</sub> H<sub>57</sub> O<sub>6</sub> P, *Fwt.*: 905.02, colourless, chunk, size: 0.60 x 0.40 x 0.20 mm, orthorhombic, space group  $P 2_1 2_1 2_1$ ,  $a = 10.3472(9) \text{ \AA}$ ,  $b = 18.8991(16) \text{ \AA}$ ,  $c = 24.1084(19) \text{ \AA}$ ,  $\alpha = 90^\circ$ ,  $\beta = 90^\circ$ ,  $\gamma = 90^\circ$ ,  $V = 4716(1) \text{ \AA}^3$ ,  $T = 103(2) \text{ K}$ ,  $Z = 4$ ,  $F(000) = 1920$ ,  $D_x = 1.275 \text{ Mg/m}^3$ ,  $\mu 0.113 \text{ mm}^{-1}$ .

A crystal of [(*S*)-**1h**·(*R,R*)-**2e**] was mounted on a fiber. Cell parameters were determined by least-squares using 62017 ( $3.04 \leq \theta \leq 27.555^\circ$ ) reflections.

Intensity data were collected on a(n) Rigaku RAXIS-RAPID II diffractometer (monochromator; Mo- $K\alpha$  radiation,  $\lambda = 0.71075 \text{ \AA}$ ) at 103(2) K in the range  $3.039 \leq \theta \leq 25.351^\circ$ .

A total of 94536 reflections were collected of which 8594 were unique [ $R(\text{int}) = 0.1053$ ,  $R(\sigma) = 0.0584$ ]; intensities of 6273 reflections were greater than  $2\sigma(I)$ . Completeness to  $\theta = 0.994$ .

A numerical absorption correction was applied to the data (the minimum and maximum transmission factors were 0.984771 and 0.990183).

The structure was solved by direct methods<sup>10,11</sup> (and subsequent difference syntheses).

Anisotropic full-matrix least-squares refinement<sup>12</sup> on  $F^2$  for all non-hydrogen atoms yielded  $R_1 = 0.0776$  and  $wR^2 = 0.1469$  for 1332 [ $I > 2\sigma(I)$ ] and  $R_1 = 0.1114$  and  $wR^2 = 0.1636$  for all (8594) intensity data, (number of parameters = 613, goodness-of-fit = 1.085, the maximum and mean shift/esd is 0.001 and 0.000). The absolute structure parameter is 0.18(5). (Friedel coverage: 0.793, Friedel fraction max.: 0.993, Friedel fraction full: 0.993).

The maximum and minimum residual electron density in the final difference map was 0.30 and

-0.22e.Å<sup>-3</sup>.

The weighting scheme applied was  $w = 1/[\sigma^2(F_o^2)+(0.04833.2355P)^2+3.2355P]$  where  $P = (F_o^2+2F_c^2)/3$ .

[(R)-1j·(R,R)-2e]: C<sub>70</sub> H<sub>63</sub> O<sub>6</sub> P, *Fwt.*: 1031.17, colourless, chunk, size: 0.40 x 0.15 x 0.15 mm, orthorhombic, space group  $P 2_1 2_1 2_1$ ,  $a = 10.1883(9)\text{Å}$ ,  $b = 22.4173(19)\text{Å}$ ,  $c = 23.625(2)\text{Å}$ ,  $\alpha = 90^\circ$ ,  $\beta = 90^\circ$ ,  $\gamma = 90^\circ$ ,  $V = 5395.8(8)\text{Å}^3$ ,  $T = 103(2)\text{K}$ ,  $Z = 4$ ,  $F(000) = 2184$ ,  $D_x = 1.269 \text{ Mg/m}^3$ ,  $\mu 0.107\text{mm}^{-1}$ .

A crystal of [(R)-1j·(R,R)-2e] was mounted on a fiber. Cell parameters were determined by least-squares using 46300 ( $3.16 \leq \theta \leq 27.44^\circ$ ) reflections.

Intensity data were collected on a(n) Rigaku RAXIS-RAPID II diffractometer (monochromator; Mo- $K\alpha$  radiation,  $\lambda = 0.71075\text{Å}$ ) at 103(2) K in the range  $3.162 \leq \theta \leq 25.350^\circ$ .

A total of 68488 reflections were collected of which 9860 were unique [ $R(\text{int}) = 0.1168$ ,  $R(\sigma) = 0.0734$ ]; intensities of 7253 reflections were greater than  $2\sigma(I)$ . Completeness to  $\theta = 0.997$ .

A numerical absorption correction was applied to the data (the minimum and maximum transmission factors were 0.988785 and 0.996190).

The structure was solved by direct methods<sup>10,11</sup> (and subsequent difference syntheses).

Anisotropic full-matrix least-squares refinement<sup>12</sup> on  $F^2$  for all non-hydrogen atoms yielded  $R_1 = 0.0597$  and  $wR^2 = 0.1040$  for 1332 [ $I > 2\sigma(I)$ ] and  $R_1 = 0.0905$  and  $wR^2 = 0.1134$  for all (9860) intensity data, (number of parameters = 701, goodness-of-fit = 1.025, the maximum and mean shift/esd is 0.001 and 0.000). The absolute structure parameter is 0.29(6). (Friedel coverage: 0.801, Friedel fraction max.: 0.999, Friedel fraction full: 0.999).

The maximum and minimum residual electron density in the final difference map was 0.17 and -0.22e.Å<sup>-3</sup>.

The weighting scheme applied was  $w = 1/[\sigma^2(F_o^2)+(0.04760.5665P)^2+0.5665P]$  where  $P = (F_o^2+2F_c^2)/3$ .

[(R)-1k·(R,R)-2e]: C<sub>70.50</sub> H<sub>69</sub> O<sub>6</sub> P, *Fwt.*: 1043.22, colourless, platelet, size: 0.45 x 0.15 x 0.15 mm, orthorhombic, space group  $P 2_1 2_1 2_1$ ,  $a = 10.2836(19)\text{Å}$ ,  $b = 23.126(4)\text{Å}$ ,  $c = 23.684(4)\text{Å}$ ,  $\alpha = 90^\circ$ ,  $\beta = 90^\circ$ ,  $\gamma = 90^\circ$ ,  $V = 5633(2)\text{Å}^3$ ,  $T = 103(2)\text{K}$ ,  $Z = 4$ ,  $F(000) = 2220$ ,  $D_x = 1.230 \text{ Mg/m}^3$ ,  $\mu 0.104\text{mm}^{-1}$ .

A crystal of [(R)-1k·(R,R)-2e] was mounted on a fiber. Cell parameters were determined by

least-squares using 26801 ( $3.125 \leq \theta \leq 25.53^\circ$ ) reflections.

Intensity data were collected on a(n) Rigaku RAXIS-RAPID II diffractometer (monochromator; Mo- $K\alpha$  radiation,  $\lambda = 0.71075\text{\AA}$ ) at 103(2) K in the range  $3.124 \leq \theta \leq 21.491^\circ$ .

A total of 47515 reflections were collected of which 6432 were unique [ $R(\text{int}) = 0.2255$ ,  $R(\sigma) = 0.1273$ ]; intensities of 4477 reflections were greater than  $2\sigma(I)$ . Completeness to  $\theta = 0.993$ .

An empirical absorption correction was applied to the data (the minimum and maximum transmission factors were 0.2899 and 1.0000).

The structure was solved by direct methods<sup>10,11</sup> (and subsequent difference syntheses).

Anisotropic full-matrix least-squares refinement<sup>12</sup> on  $F^2$  for all non-hydrogen atoms yielded  $R_1 = 0.1196$  and  $wR^2 = 0.2756$  for 1332 [ $I > 2\sigma(I)$ ] and  $R_1 = 0.1650$  and  $wR^2 = 0.3109$  for all (6432) intensity data, (number of parameters = 689, goodness-of-fit = 1.116, the maximum and mean shift/esd is 0.001 and 0.000). The absolute structure parameter is 0.4(2). (Friedel coverage: 0.774, Friedel fraction max.: 0.995, Friedel fraction full: 0.995).

The maximum and minimum residual electron density in the final difference map was 0.55 and  $-0.28\text{e}\cdot\text{\AA}^{-3}$ .

The weighting scheme applied was  $w = 1/[\sigma^2(F_o^2) + (0.120800P)^2 + 17.6425P]$  where  $P = (F_o^2 + 2F_c^2)/3$ .

[(*R*)-**1m**·(*R*,*R*)-**2e**]:  $\text{C}_{74}\text{H}_{73}\text{O}_6\text{P}$ , *F*wt.: 1089.29, colourless, block, size: 0.40 x 0.17 x 0.15 mm, orthorhombic, space group  $P 2_1 2_1 2_1$ ,  $a = 10.3398(9)\text{\AA}$ ,  $b = 23.222(2)\text{\AA}$ ,  $c = 23.718(2)\text{\AA}$ ,  $\alpha = 90^\circ$ ,  $\beta = 90^\circ$ ,  $\gamma = 90^\circ$ ,  $V = 5695(1)\text{\AA}^3$ ,  $T = 103(2)\text{K}$ ,  $Z = 4$ ,  $F(000) = 2320$ ,  $D_x = 1.270\text{ Mg/m}^3$ ,  $\mu = 0.105\text{mm}^{-1}$ .

A crystal of [(*R*)-**1m**·(*R*,*R*)-**2e**] was mounted on a fiber. Cell parameters were determined by least-squares using 63144 ( $3.115 \leq \theta \leq 27.425^\circ$ ) reflections.

Intensity data were collected on a(n) Rigaku RAXIS-RAPID II diffractometer (monochromator; Mo- $K\alpha$  radiation,  $\lambda = 0.71075\text{\AA}$ ) at 103(2) K in the range  $3.117 \leq \theta \leq 25.351^\circ$ .

A total of 102295 reflections were collected of which 10408 were unique [ $R(\text{int}) = 0.1637$ ,  $R(\sigma) = 0.0940$ ]; intensities of 8299 reflections were greater than  $2\sigma(I)$ . Completeness to  $\theta = 0.997$ .

A numerical absorption correction was applied to the data (the minimum and maximum transmission factors were 0.5599 and 1.0000).

The structure was solved by direct methods<sup>10,11</sup> (and subsequent difference syntheses).

Anisotropic full-matrix least-squares refinement<sup>12</sup> on  $F^2$  for all non-hydrogen atoms yielded  $R_1 = 0.0690$  and  $wR^2 = 0.1170$  for 1332 [ $I > 2\sigma(I)$ ] and  $R_1 = 0.0929$  and  $wR^2 = 0.1251$  for all (

10408) intensity data, (number of parameters = 738, goodness-of-fit = 1.077, the maximum and mean shift/esd is 0.002 and 0.000). The absolute structure parameter is 0.12(8). (Friedel coverage: 0.804, Friedel fraction max.: 0.999, Friedel fraction full: 0.999).

The maximum and minimum residual electron density in the final difference map was 0.23 and -0.29 e.Å<sup>-3</sup>.

The weighting scheme applied was  $w = 1/[\sigma^2(F_o^2) + (0.04262 + 0.0874P)^2 + 2.0874P]$  where  $P = (F_o^2 + 2F_c^2)/3$ .



**Table S11:** Summary of crystallographic data, data collections, structure determination and refinement for the corresponding diastereomers.

|                                                     | [( <i>R</i> )- <b>1a</b> ·( <i>R,R</i> )- <b>2e</b> ]                                                                               | [( <i>R</i> )- <b>1b</b> ·( <i>R,R</i> )- <b>2e</b> ]                                                                               | [( <i>R</i> )- <b>1c</b> ·( <i>R,R</i> )- <b>2e</b> ]                                                                               | [( <i>R</i> )- <b>1k</b> ·( <i>R,R</i> )- <b>2e</b> ]                                                                               |
|-----------------------------------------------------|-------------------------------------------------------------------------------------------------------------------------------------|-------------------------------------------------------------------------------------------------------------------------------------|-------------------------------------------------------------------------------------------------------------------------------------|-------------------------------------------------------------------------------------------------------------------------------------|
| Number                                              | 2143598                                                                                                                             | 2143599                                                                                                                             | 2143600                                                                                                                             | 2143601                                                                                                                             |
| CCDC                                                |                                                                                                                                     |                                                                                                                                     |                                                                                                                                     |                                                                                                                                     |
| Empirical formula                                   | C <sub>50</sub> H <sub>42</sub> O <sub>4</sub><br>C <sub>7</sub> H <sub>8</sub><br>C <sub>16</sub> H <sub>21</sub> O <sub>2</sub> P | C <sub>50</sub> H <sub>42</sub> O <sub>4</sub><br>C <sub>7</sub> H <sub>8</sub><br>C <sub>16</sub> H <sub>21</sub> O <sub>2</sub> P | C <sub>50</sub> H <sub>42</sub> O <sub>4</sub><br>C <sub>7</sub> H <sub>8</sub><br>C <sub>11</sub> H <sub>15</sub> O <sub>2</sub> P | C <sub>50</sub> H <sub>42</sub> O <sub>4</sub><br>C <sub>7</sub> H <sub>8</sub><br>C <sub>17</sub> H <sub>22</sub> O <sub>2</sub> P |
| Formula weight                                      | 1075.26                                                                                                                             | 1075.26                                                                                                                             | 1009.17                                                                                                                             | 1043.22                                                                                                                             |
| Temperature                                         | 103(2)                                                                                                                              | 103(2)                                                                                                                              | 103(2)                                                                                                                              | 103(2)                                                                                                                              |
| Radiation and wavelength                            | Mo-Kα, λ = 0.71075 Å                                                                                                                |
| Crystal system                                      | orthorhombic                                                                                                                        | orthorhombic                                                                                                                        | orthorhombic                                                                                                                        | orthorhombic                                                                                                                        |
| Space group                                         | <i>P</i> 2 <sub>1</sub> 2 <sub>1</sub> 2 <sub>1</sub>                                                                               |
| Unit cell dimensions                                | <i>a</i> = 10.3422(7) Å<br><i>b</i> = 23.1822(17) Å<br><i>c</i> = 23.8390(18) Å<br>α = 90°<br>β = 90°<br>γ = 90°                    | <i>a</i> = 10.2809(13) Å<br><i>b</i> = 22.954(3) Å<br><i>c</i> = 23.721(3) Å<br>α = 90°<br>β = 90°<br>γ = 90°                       | <i>a</i> = 10.2844(10) Å<br><i>b</i> = 22.511(3) Å<br><i>c</i> = 22.695(2) Å<br>α = 90°<br>β = 90°<br>γ = 90°                       | <i>a</i> = 10.2836(19) Å<br><i>b</i> = 23.126(4) Å<br><i>c</i> = 23.684(4) Å<br>α = 90°<br>β = 90°<br>γ = 90°                       |
| Volume                                              | 5716(1) Å <sup>3</sup>                                                                                                              | 5598(1) Å <sup>3</sup>                                                                                                              | 5254(1) Å <sup>3</sup>                                                                                                              | 5633(2) Å <sup>3</sup>                                                                                                              |
| <i>Z</i> , <i>Z'</i>                                | 4, 1                                                                                                                                | 4, 1                                                                                                                                | 4, 1                                                                                                                                | 4, 1                                                                                                                                |
| Density (calculated)                                | 1.250 Mg/m <sup>3</sup>                                                                                                             | 1.276 Mg/m <sup>3</sup>                                                                                                             | 1.276 Mg/m <sup>3</sup>                                                                                                             | 1.230 Mg/m <sup>3</sup>                                                                                                             |
| Absorption coefficient, μ<br><i>F</i> (000)         | 0.104 mm <sup>-1</sup><br>2288                                                                                                      | 0.106 mm <sup>-1</sup><br>2288                                                                                                      | 0.109 mm <sup>-1</sup><br>2144                                                                                                      | 0.104 mm <sup>-1</sup><br>2220                                                                                                      |
| Crystal colour                                      | colourless                                                                                                                          | colourless                                                                                                                          | colourless                                                                                                                          | colourless                                                                                                                          |
| Crystal description                                 | chunk                                                                                                                               | needle                                                                                                                              | block                                                                                                                               | platelet                                                                                                                            |
| Crystal size                                        | 0.50 x 0.40 x 0.40 mm                                                                                                               | 0.50 x 0.10 x 0.10 mm                                                                                                               | 0.50 x 0.100 x 0.10 mm                                                                                                              | 0.45 x 0.15 x 0.10 mm                                                                                                               |
| Absorption correction                               | empirical                                                                                                                           | numerical                                                                                                                           | numerical                                                                                                                           | empirical                                                                                                                           |
| Max. and min. transmission                          | 0.7230 and 1.0000                                                                                                                   | 0.988724 and 0.998178                                                                                                               | 0.991439 and 0.996990                                                                                                               | 0.2899 and 1.0000                                                                                                                   |
| θ–range for data collection                         | 3.108 ≤ θ ≤ 25.350°                                                                                                                 | 3.129 ≤ θ ≤ 23.532°                                                                                                                 | 3.228 ≤ θ ≤ 21.964°                                                                                                                 | 3.124 ≤ θ ≤ 21.491°                                                                                                                 |
| Index ranges                                        | -12 ≤ <i>h</i> ≤ 12;<br>-27 ≤ <i>k</i> ≤ 27;<br>-28 ≤ <i>l</i> ≤ 28                                                                 | -11 ≤ <i>h</i> ≤ 11;<br>-25 ≤ <i>k</i> ≤ 25;<br>-26 ≤ <i>l</i> ≤ 26                                                                 | -10 ≤ <i>h</i> ≤ 10;<br>-23 ≤ <i>k</i> ≤ 23;<br>-23 ≤ <i>l</i> ≤ 23                                                                 | -10 ≤ <i>h</i> ≤ 10;<br>-23 ≤ <i>k</i> ≤ 23;<br>-24 ≤ <i>l</i> ≤ 24                                                                 |
| Reflections collected                               | 75348                                                                                                                               | 114437                                                                                                                              | 43009                                                                                                                               | 47515                                                                                                                               |
| Completeness to 2θ                                  | 0.997                                                                                                                               | 0.996                                                                                                                               | 0.996                                                                                                                               | 0.993                                                                                                                               |
| Absolute structure parameter                        | 0.11(9)                                                                                                                             | -0.03(8)                                                                                                                            | -0.05(12)                                                                                                                           | 0.4(2)                                                                                                                              |
| Friedel coverage                                    | 0.803                                                                                                                               | 0.790                                                                                                                               | 0.776                                                                                                                               | 0.774                                                                                                                               |
| Friedel fraction max.                               | 0.999                                                                                                                               | 0.998                                                                                                                               | 0.999                                                                                                                               | 0.995                                                                                                                               |
| Friedel fraction full                               | 0.999                                                                                                                               | 0.998                                                                                                                               | 0.999                                                                                                                               | 0.995                                                                                                                               |
| Independent reflections                             | 10434 [ <i>R</i> (int) = 0.1701]                                                                                                    | 8286 [ <i>R</i> (int) = 0.2025]                                                                                                     | 6392 [ <i>R</i> (int) = 0.1544]                                                                                                     | 6432 [ <i>R</i> (int) = 0.2255]                                                                                                     |
| Reflections <i>I</i> > 2σ( <i>I</i> )               | 6380                                                                                                                                | 6257                                                                                                                                | 4811                                                                                                                                | 4477                                                                                                                                |
| Data / restraints / parameters                      | 10434 / 15 / 699                                                                                                                    | 8286 / 4 / 688                                                                                                                      | 6392 / 12 / 713                                                                                                                     | 6432 / 1 / 689                                                                                                                      |
| Goodness-of-fit on <i>F</i> <sup>2</sup>            | 1.103                                                                                                                               | 1.072                                                                                                                               | 1.065                                                                                                                               | 1.116                                                                                                                               |
| Final <i>R</i> indices [ <i>I</i> > 2σ( <i>I</i> )] | <i>R</i> <sub>1</sub> = 0.0866,<br><i>wR</i> <sup>2</sup> = 0.1287                                                                  | <i>R</i> <sub>1</sub> = 0.0743,<br><i>wR</i> <sup>2</sup> = 0.1356                                                                  | <i>R</i> <sub>1</sub> = 0.0668,<br><i>wR</i> <sup>2</sup> = 0.1191                                                                  | <i>R</i> <sub>1</sub> = 0.1196,<br><i>wR</i> <sup>2</sup> = 0.2756                                                                  |
| <i>R</i> indices (all data)                         | <i>R</i> <sub>1</sub> = 0.1501,<br><i>wR</i> <sup>2</sup> = 0.1479                                                                  | <i>R</i> <sub>1</sub> = 0.1044,<br><i>wR</i> <sup>2</sup> = 0.1461                                                                  | <i>R</i> <sub>1</sub> = 0.0965,<br><i>wR</i> <sup>2</sup> = 0.1306                                                                  | <i>R</i> <sub>1</sub> = 0.1650,<br><i>wR</i> <sup>2</sup> = 0.3109                                                                  |
| Max. and mean shift/esd                             | 0.002; 0.000                                                                                                                        | 0.000; 0.000                                                                                                                        | 0.001; 0.000                                                                                                                        | 0.001; 0.000                                                                                                                        |
| Largest diff. peak and hole                         | 0.26; -0.18 e.Å <sup>-3</sup>                                                                                                       | 0.33; -0.19 e.Å <sup>-3</sup>                                                                                                       | 0.21; -0.18 e.Å <sup>-3</sup>                                                                                                       | 0.55; -0.28 e.Å <sup>-3</sup>                                                                                                       |

**Table S11 (continued):** Summary of crystallographic data, data collections, structure determination and refinement for the corresponding diastereomers.

| Number                                                      | [( <i>R</i> )-1 <i>m</i> ·( <i>R,R</i> )-2 <i>e</i> ]                                                                   | [( <i>S</i> )-1 <i>h</i> ·( <i>R,R</i> )-2 <i>e</i> ]                                                                       | [( <i>R</i> )-1 <i>d</i> ·( <i>R,R</i> )-2 <i>e</i> ]                                                                    | [( <i>R<sub>p</sub></i> )-1 <i>e</i> ·( <i>R,R</i> )-2 <i>e</i> ]                                                         |
|-------------------------------------------------------------|-------------------------------------------------------------------------------------------------------------------------|-----------------------------------------------------------------------------------------------------------------------------|--------------------------------------------------------------------------------------------------------------------------|---------------------------------------------------------------------------------------------------------------------------|
| CCDC                                                        | 2143602                                                                                                                 | 2143603                                                                                                                     | 2143604                                                                                                                  | 2143605                                                                                                                   |
| Empirical formula                                           | C50 H42 O4<br>C7 H8<br>C14 H23 O2 P                                                                                     | C50 H42 O4<br>C10 H15 O2 P                                                                                                  | C50 H42 O4<br>C7 H8<br>C12 H18 O2 P                                                                                      | C50 H42 O4<br>C16 H25 O2 P                                                                                                |
| Formula weight                                              | 1089.29                                                                                                                 | 905.02                                                                                                                      | 1017.04                                                                                                                  | 987.16                                                                                                                    |
| Temperature                                                 | 103(2)                                                                                                                  | 103(2)                                                                                                                      | 103(2)                                                                                                                   | 103(2)                                                                                                                    |
| Radiation and wavelength                                    | Mo-K $\alpha$ , $\lambda$ =0.71075Å                                                                                     | Mo-K $\alpha$ , $\lambda$ =0.71075Å                                                                                         | Mo-K $\alpha$ , $\lambda$ =0.71075Å                                                                                      | Mo-K $\alpha$ , $\lambda$ =0.71075Å                                                                                       |
| Crystal system                                              | orthorhombic                                                                                                            | orthorhombic                                                                                                                | orthorhombic                                                                                                             | orthorhombic                                                                                                              |
| Space group                                                 | <i>P</i> 2 <sub>1</sub> 2 <sub>1</sub> 2 <sub>1</sub>                                                                   | <i>P</i> 2 <sub>1</sub> 2 <sub>1</sub> 2 <sub>1</sub>                                                                       | <i>P</i> 2 <sub>1</sub> 2 <sub>1</sub> 2 <sub>1</sub>                                                                    | <i>P</i> 2 <sub>1</sub> 2 <sub>1</sub> 2 <sub>1</sub>                                                                     |
| Unit cell dimensions                                        | <i>a</i> =10.3398(9)Å<br><i>b</i> =23.222(2)Å<br><i>c</i> =23.718(2)Å<br>$\alpha$ =90°<br>$\beta$ =90°<br>$\gamma$ =90° | <i>a</i> =10.3472(9)Å<br><i>b</i> =18.8991(16)Å<br><i>c</i> =24.1084(19)Å<br>$\alpha$ =90°<br>$\beta$ =90°<br>$\gamma$ =90° | <i>a</i> =10.2836(19)Å<br><i>b</i> =23.126(4)Å<br><i>c</i> =23.684(4)Å<br>$\alpha$ =90°<br>$\beta$ =90°<br>$\gamma$ =90° | <i>a</i> =10.1392(9)Å<br><i>b</i> =21.9837(19)Å<br><i>c</i> =23.902(2)Å<br>$\alpha$ =90°<br>$\beta$ =90°<br>$\gamma$ =90° |
| Volume                                                      | 5695(1)Å <sup>3</sup>                                                                                                   | 4714.5(7)Å <sup>3</sup>                                                                                                     | 5633(2)Å <sup>3</sup>                                                                                                    | 5328(1)Å <sup>3</sup>                                                                                                     |
| <i>Z</i> , <i>Z'</i>                                        | 4, 1                                                                                                                    | 4, 1                                                                                                                        | 4, 1                                                                                                                     | 4, 1                                                                                                                      |
| Density (calculated)                                        | 1.270 Mg/m <sup>3</sup>                                                                                                 | 1.275 Mg/m <sup>3</sup>                                                                                                     | 1.199 Mg/m <sup>3</sup>                                                                                                  | 1.231 Mg/m <sup>3</sup>                                                                                                   |
| Absorption coefficient, $\mu$                               | 0.105 mm <sup>-1</sup>                                                                                                  | 0.113 mm <sup>-1</sup>                                                                                                      | 0.102 mm <sup>-1</sup>                                                                                                   | 0.106 mm <sup>-1</sup>                                                                                                    |
| <i>F</i> (000)                                              | 2320                                                                                                                    | 1920                                                                                                                        | 2163                                                                                                                     | 2104                                                                                                                      |
| Crystal colour                                              | colourless                                                                                                              | colourless                                                                                                                  | colourless                                                                                                               | colourless                                                                                                                |
| Crystal description                                         | block                                                                                                                   | chunk                                                                                                                       | chunk                                                                                                                    | needle                                                                                                                    |
| Crystal size                                                | 0.40 x 0.17 x 0.15 mm                                                                                                   | 0.60 x 0.40x 0.200 mm                                                                                                       | 0.45 x 0.15 x 0.15 mm                                                                                                    | 0.40 x 0.07 x 0.04 mm                                                                                                     |
| Absorption correction                                       | numerical                                                                                                               | numerical                                                                                                                   | numerical                                                                                                                | empirical                                                                                                                 |
| Max. and min. transmission                                  | 0.5599 and 1.0000                                                                                                       | 0.984771 and 0.9901830.990194 and 0.9962290.4445 and 1.0000                                                                 | 3.124 $\leq$ $\theta$ $\leq$ 21.491°                                                                                     | 3.158 $\leq$ $\theta$ $\leq$ 25.350°                                                                                      |
| $\theta$ -range for data collection                         | 3.117 $\leq$ $\theta$ $\leq$ 25.351°                                                                                    | 3.039 $\leq$ $\theta$ $\leq$ 25.351°                                                                                        | 3.124 $\leq$ $\theta$ $\leq$ 21.491°                                                                                     | 3.158 $\leq$ $\theta$ $\leq$ 25.350°                                                                                      |
| Index ranges                                                | -12 $\leq$ <i>h</i> $\leq$ 12;<br>-27 $\leq$ <i>k</i> $\leq$ 27;<br>-28 $\leq$ <i>l</i> $\leq$ 28                       | -12 $\leq$ <i>h</i> $\leq$ 12;<br>-22 $\leq$ <i>k</i> $\leq$ 22;<br>-29 $\leq$ <i>l</i> $\leq$ 29                           | -10 $\leq$ <i>h</i> $\leq$ 10;<br>-23 $\leq$ <i>k</i> $\leq$ 23;<br>-24 $\leq$ <i>l</i> $\leq$ 24                        | -12 $\leq$ <i>h</i> $\leq$ 12;<br>-26 $\leq$ <i>k</i> $\leq$ 26;<br>-28 $\leq$ <i>l</i> $\leq$ 28                         |
| Reflections collected                                       | 102295                                                                                                                  | 94536                                                                                                                       | 192117                                                                                                                   | 114772                                                                                                                    |
| Completeness to 2 $\theta$                                  | 0.997                                                                                                                   | 0.994                                                                                                                       | 0.996                                                                                                                    | 0.997                                                                                                                     |
| Absolute structure parameter                                | 0.12(8)                                                                                                                 | 0.18(5)                                                                                                                     | 0.17(7)                                                                                                                  | -0.05(13)                                                                                                                 |
| Friedel coverage                                            | 0.804                                                                                                                   | 0.793                                                                                                                       | 0.775                                                                                                                    | 0.799                                                                                                                     |
| Friedel fraction max.                                       | 0.999                                                                                                                   | 0.993                                                                                                                       | 0.999                                                                                                                    | 0.999                                                                                                                     |
| Friedel fraction full                                       | 0.999                                                                                                                   | 0.993                                                                                                                       | 0.999                                                                                                                    | 0.999                                                                                                                     |
| Independent reflections                                     | 10408 [ <i>R</i> (int) =0.1637]                                                                                         | 8594 [ <i>R</i> (int) =0.1053]                                                                                              | 6451 [ <i>R</i> (int) =0.1849]                                                                                           | 9729 [ <i>R</i> (int) =0.3192]                                                                                            |
| Reflections <i>I</i> >2 $\sigma$ ( <i>I</i> )               | 8299                                                                                                                    | 6273                                                                                                                        | 5814                                                                                                                     | 6069                                                                                                                      |
| Data / restraints / parameters                              | 10408 /0 /738                                                                                                           | 8594 /2 /613                                                                                                                | 6451 /7 /696                                                                                                             | 9729 /6 /711                                                                                                              |
| Goodness-of-fit on <i>F</i> <sup>2</sup>                    | 1.077                                                                                                                   | 1.085                                                                                                                       | 1.154                                                                                                                    | 1.118                                                                                                                     |
| Final <i>R</i> indices [ <i>I</i> >2 $\sigma$ ( <i>I</i> )] | <i>R</i> <sub>1</sub> =0.0690,<br><i>wR</i> <sup>2</sup> =0.1170                                                        | <i>R</i> <sub>1</sub> =0.0776,<br><i>wR</i> <sup>2</sup> =0.1469                                                            | <i>R</i> <sub>1</sub> =0.0679,<br><i>wR</i> <sup>2</sup> =0.1359                                                         | <i>R</i> <sub>1</sub> =0.1080,<br><i>wR</i> <sup>2</sup> =0.1278                                                          |
| <i>R</i> indices (all data)                                 | <i>R</i> <sub>1</sub> =0.0929,<br><i>wR</i> <sup>2</sup> =0.1251                                                        | <i>R</i> <sub>1</sub> =0.1114,<br><i>wR</i> <sup>2</sup> =0.1636                                                            | <i>R</i> <sub>1</sub> =0.0773,<br><i>wR</i> <sup>2</sup> =0.1398                                                         | <i>R</i> <sub>1</sub> =0.1706,<br><i>wR</i> <sup>2</sup> =0.1464                                                          |
| Max. and mean shift/esd                                     | 0.002;0.000                                                                                                             | 0.001;0.000                                                                                                                 | 0.000;0.000                                                                                                              | 0.000;0.000                                                                                                               |
| Largest diff. peak and hole                                 | 0.23;-0.29 e.Å <sup>-3</sup>                                                                                            | 0.30;-0.22 e.Å <sup>-3</sup>                                                                                                | 0.31;-0.21 e.Å <sup>-3</sup>                                                                                             | 0.22;-0.25 e.Å <sup>-3</sup>                                                                                              |

**Table S11 (continued):** Summary of crystallographic data, data collections, structure determination and refinement for the corresponding diastereomers.

|                                                    | [( <i>R</i> )-1 <i>f</i> ·( <i>R</i> , <i>R</i> )-2 <i>e</i> ]      | [( <i>R</i> )-1 <i>j</i> ·( <i>R</i> , <i>R</i> )-2 <i>e</i> ]      |
|----------------------------------------------------|---------------------------------------------------------------------|---------------------------------------------------------------------|
| Number                                             | 2143606                                                             | 2143607                                                             |
| CCDC                                               | 2143606                                                             | 2143607                                                             |
| Empirical formula                                  | C <sub>50</sub> H <sub>42</sub> O <sub>4</sub>                      | C <sub>50</sub> H <sub>42</sub> O <sub>4</sub>                      |
|                                                    | C <sub>7</sub> H <sub>8</sub>                                       | C <sub>7</sub> H <sub>8</sub>                                       |
|                                                    | C <sub>13</sub> H <sub>19</sub> O <sub>2</sub> P                    | C <sub>13</sub> H <sub>13</sub> O <sub>2</sub> P                    |
| Formula weight                                     | 1037.22                                                             | 1031.17                                                             |
| Temperature                                        | 103(2)                                                              | 103(2)                                                              |
| Radiation and wavelength                           | Mo-Kα, λ =0.71075Å                                                  | Mo-Kα, λ =0.71075Å                                                  |
| Crystal system                                     | orthorhombic                                                        | orthorhombic                                                        |
| Space group                                        | <i>P</i> 2 <sub>1</sub> 2 <sub>1</sub> 2 <sub>1</sub>               | <i>P</i> 2 <sub>1</sub> 2 <sub>1</sub> 2 <sub>1</sub>               |
| Unit cell dimensions                               | <i>a</i> =10.2103(10)Å                                              | <i>a</i> =10.1883(9)Å                                               |
|                                                    | <i>b</i> =22.6629(18)Å                                              | <i>b</i> =22.4173(19)Å                                              |
|                                                    | <i>c</i> =23.531(2)Å                                                | <i>c</i> =23.625(2)Å                                                |
|                                                    | α =90°                                                              | α =90°                                                              |
|                                                    | β =90°                                                              | β =90°                                                              |
|                                                    | γ =90°                                                              | γ =90°                                                              |
| Volume                                             | 5445.0(8)Å <sup>3</sup>                                             | 5396(1)Å <sup>3</sup>                                               |
| <i>Z</i> , <i>Z'</i>                               | 4, 1                                                                | 4, 1                                                                |
| Density (calculated)                               | 1.265 Mg/m <sup>3</sup>                                             | 1.269 Mg/m <sup>3</sup>                                             |
| Absorption coefficient, μ                          | 0.107 mm <sup>-1</sup>                                              | 0.107 mm <sup>-1</sup>                                              |
| <i>F</i> (000)                                     | 2208                                                                | 2184                                                                |
| Crystal colour                                     | colourless                                                          | colourless                                                          |
| Crystal description                                | block                                                               | chunk                                                               |
| Crystal size                                       | 0.40 x 0.25 x 0.20 mm                                               | 0.40 x 0.15 x 0.15 mm                                               |
| Absorption correction                              | numerical                                                           | numerical                                                           |
| Max. and min. transmission                         | 0.988662 and 0.996401                                               | 0.988785 and 0.996190                                               |
| θ–range for data collection                        | 3.159 ≤ θ ≤ 25.351°                                                 | 3.162 ≤ θ ≤ 25.350°                                                 |
| Index ranges                                       | -12 ≤ <i>h</i> ≤ 12;<br>-27 ≤ <i>k</i> ≤ 26;<br>-28 ≤ <i>l</i> ≤ 28 | -12 ≤ <i>h</i> ≤ 12;<br>-27 ≤ <i>k</i> ≤ 27;<br>-28 ≤ <i>l</i> ≤ 28 |
| Reflections collected                              | 61727                                                               | 68488                                                               |
| Completeness to 2θ                                 | 0.981                                                               | 0.997                                                               |
| Absolute structure parameter                       | 0.02(7)                                                             | 0.29(6)                                                             |
| Friedel coverage                                   | 0.798                                                               | 0.801                                                               |
| Friedel fraction max.                              | 0.980                                                               | 0.999                                                               |
| Friedel fraction full                              | 0.980                                                               | 0.999                                                               |
| Independent reflections                            | 9769 [ <i>R</i> (int) =0.1373]                                      | 9860 [ <i>R</i> (int) =0.1168]                                      |
| Reflections <i>I</i> >2σ( <i>I</i> )               | 7176                                                                | 7253                                                                |
| Data / restraints / parameters                     | 9769 /0 /701                                                        | 9860 /0 /701                                                        |
| Goodness-of-fit on <i>F</i> <sup>2</sup>           | 1.031                                                               | 1.025                                                               |
| Final <i>R</i> indices [ <i>I</i> >2σ( <i>I</i> )] | <i>R</i> <sub>1</sub> =0.0653,<br><i>wR</i> <sup>2</sup> =0.1101    | <i>R</i> <sub>1</sub> =0.0597,<br><i>wR</i> <sup>2</sup> =0.1040    |
| <i>R</i> indices (all data)                        | <i>R</i> <sub>1</sub> =0.1001,<br><i>wR</i> <sup>2</sup> =0.1207    | <i>R</i> <sub>1</sub> =0.0905,<br><i>wR</i> <sup>2</sup> =0.1134    |
| Max. and mean shift/esd                            | 0.001;0.000                                                         | 0.001;0.000                                                         |
| Largest diff. peak and hole                        | 0.24;-0.29 e.Å <sup>-3</sup>                                        | 0.17;-0.22 e.Å <sup>-3</sup>                                        |

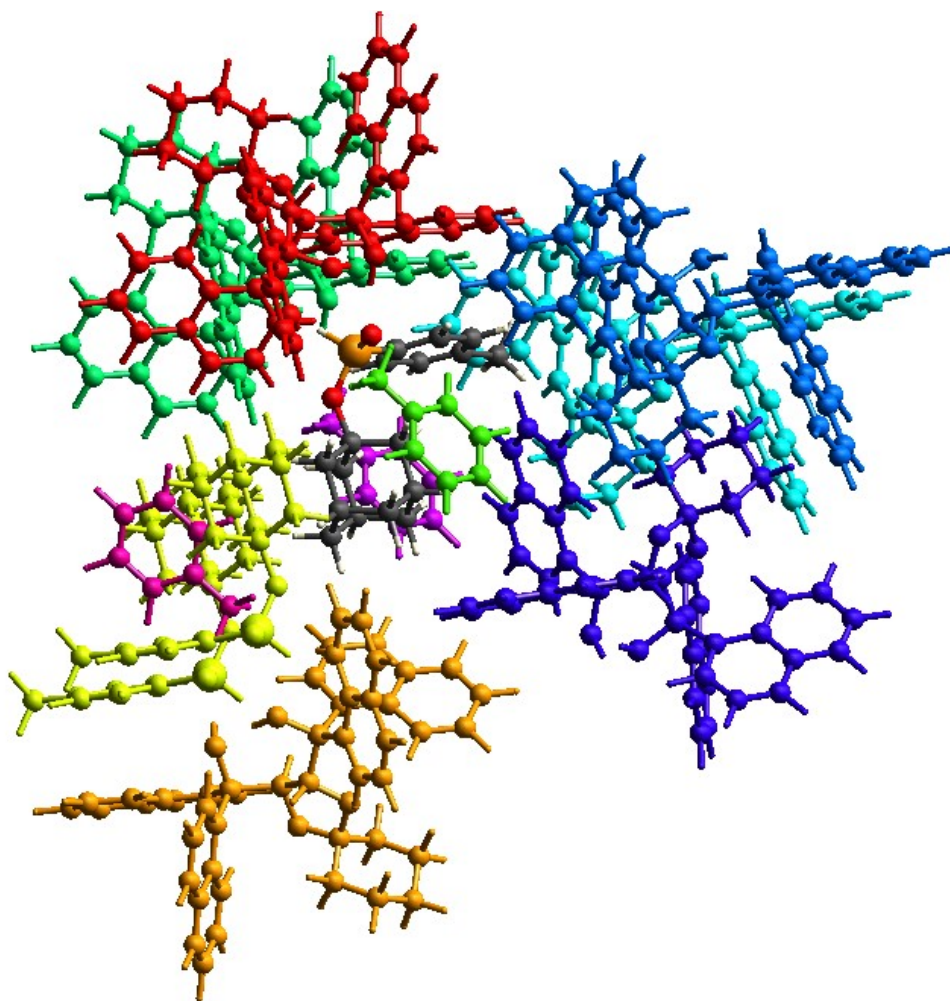

|  | N | Symop             | R    | Electron Density | E_ele | E_pol | E_dis | E_rep | E_tot |
|--|---|-------------------|------|------------------|-------|-------|-------|-------|-------|
|  | 1 | -                 | 7.46 | B3LYP/6-31G(d,p) | -75.6 | -21.9 | -67.6 | 110.1 | -87   |
|  | 1 | -                 | 9.47 | B3LYP/6-31G(d,p) | -7.2  | -1.2  | -50.8 | 28.1  | -35.4 |
|  | 1 | -                 | 9    | B3LYP/6-31G(d,p) | -5.7  | -2.1  | -28.9 | 16.8  | -22.3 |
|  | 1 | -                 | 10.5 | B3LYP/6-31G(d,p) | -5.6  | -1.6  | -23.1 | 12.4  | -19.6 |
|  | 1 | -                 | 11.3 | B3LYP/6-31G(d,p) | -4.1  | -0.6  | -26.7 | 14.8  | -18.9 |
|  | 1 | -                 | 11.1 | B3LYP/6-31G(d,p) | -5.7  | -1    | -26.5 | 18.9  | -18.2 |
|  | 2 | x+1/2, -y+1/2, -z | 9.48 | B3LYP/6-31G(d,p) | -1.3  | -0.3  | -13.3 | 5.7   | -9.7  |
|  | 1 | -                 | 7.85 | B3LYP/6-31G(d,p) | -1.3  | -0.3  | -13.3 | 5.7   | -9.7  |
|  | 1 | -                 | 5.38 | B3LYP/6-31G(d,p) | -1.4  | -0.3  | -1.5  | 0     | -3    |
|  | 1 | -                 | 5.33 | B3LYP/6-31G(d,p) | 0     | nan   | 0     | 0     | nan   |

**Fig. S4.** The calculated total energy and its particles are shown between the molecules in the crystal lattices of the diastereomer incorporating 1-adamantyl (4-methylphenyl)-*H*-phosphinate [(*R*)-**1m**] and (*R,R*)-(1-naphthyl)-spiro-TADDOL [(*R,R*)-**2e**]. Total energies ( $E_{tot}$ ) is reported by the DFT interaction energy calculation, which are the sum of the coulomb interactions ( $E_{ele}$ ), polar interactions ( $E_{pol}$ ), dispersion interactions ( $E_{dis}$ ) and the repulsive ( $E_{rep}$ ) interactions. The four energy components are scaled in the total Energy ( $E_{tot}=1.057*E_{ele}+0.740*E_{pol}+0.871*E_{dis}+0.618*E_{rep}$ ). The interaction energies were investigated for a 3.8 Å cluster around the selected phosphorous derivatives. All fragment molecules were completed around the phosphorous molecule.

**$^{31}\text{P}$ ,  $^{19}\text{F}$ ,  $^1\text{H}$  and  $^{13}\text{C}$  NMR spectra of the compounds prepared**

1-adamantyl phenyl-*H*-phosphinate (**1a**)

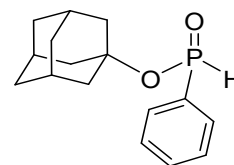

$^{31}\text{P}\{^1\text{H}\}$  NMR (121.5 MHz,  $\text{CDCl}_3$ )

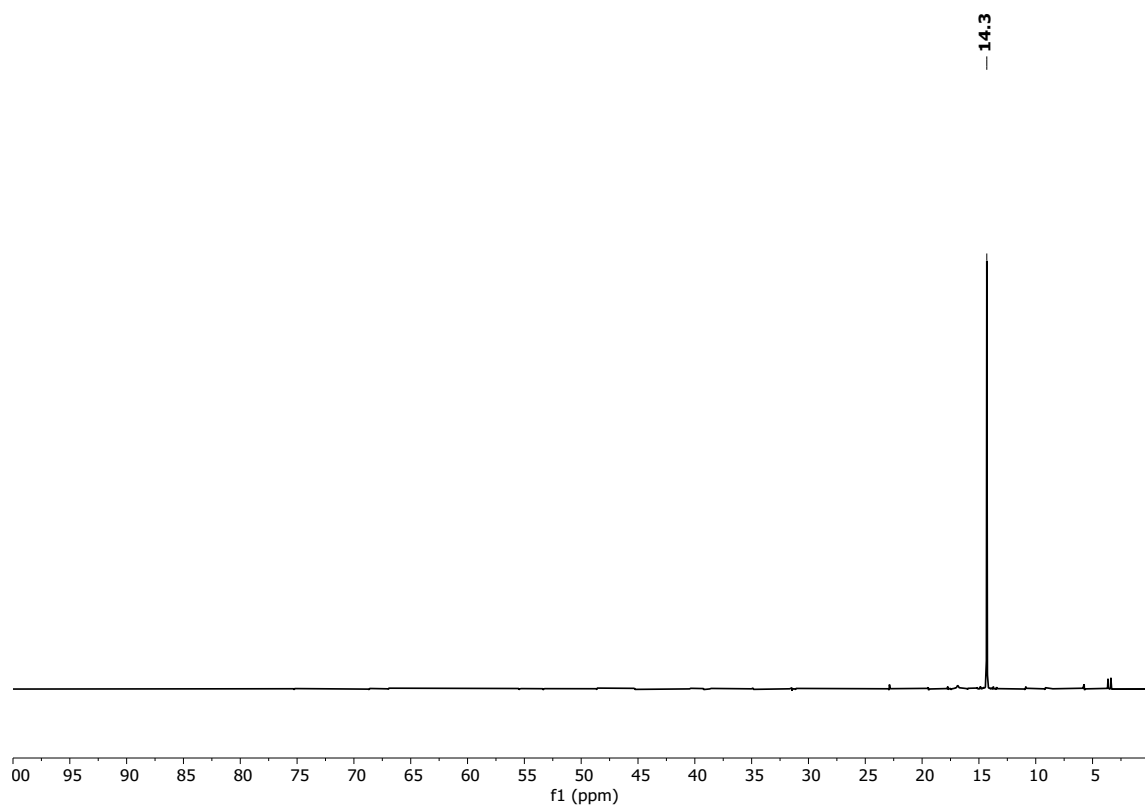

$^1\text{H}$  NMR (300 MHz,  $\text{CDCl}_3$ )

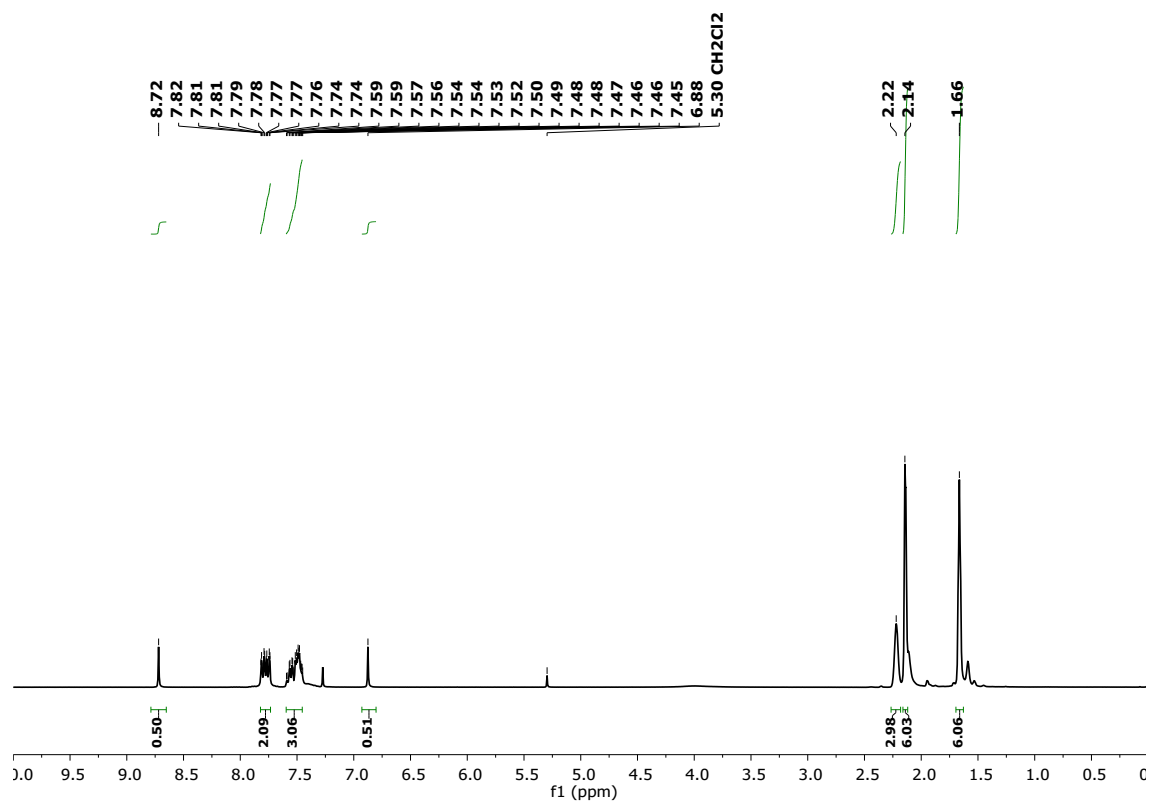

$^{13}\text{C}\{^1\text{H}\}$  NMR (75.5 MHz,  $\text{CDCl}_3$ )

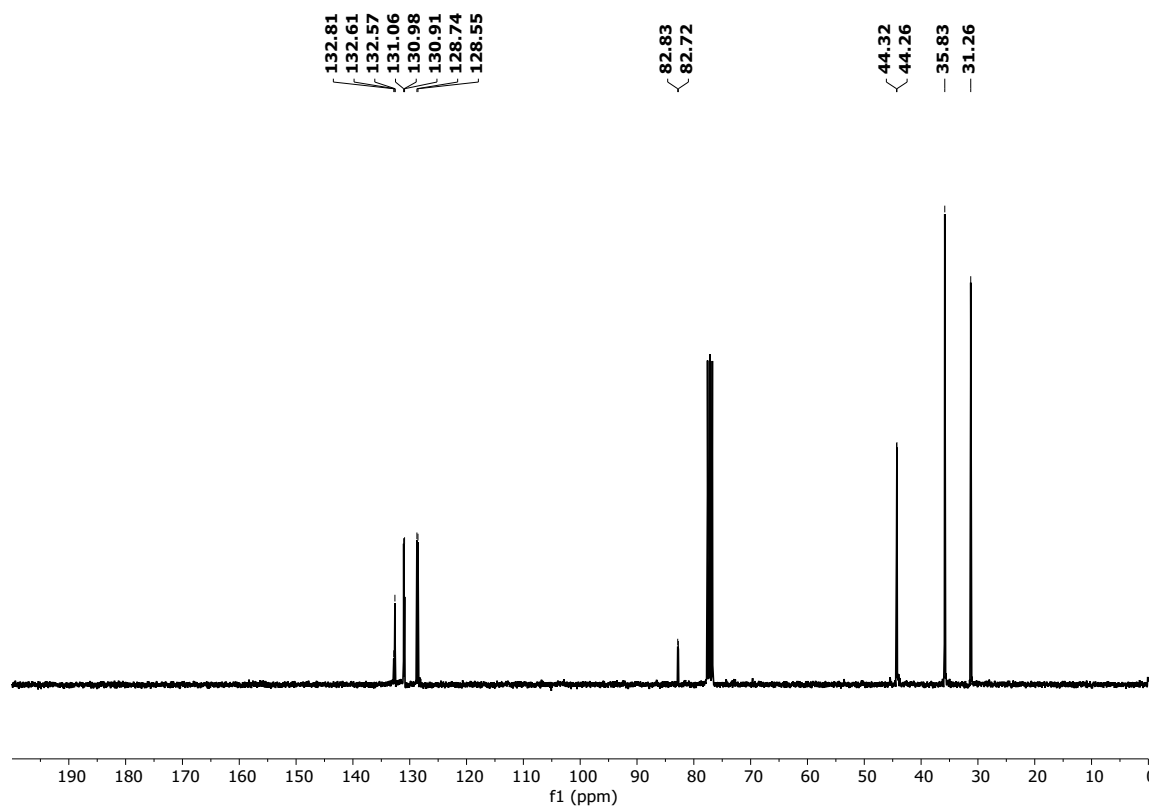

2-adamantyl phenyl-*H*-phosphinate (**1b**)

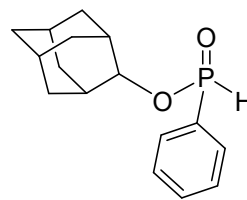

$^{31}\text{P}\{^1\text{H}\}$  NMR (202.5 MHz,  $\text{CDCl}_3$ )

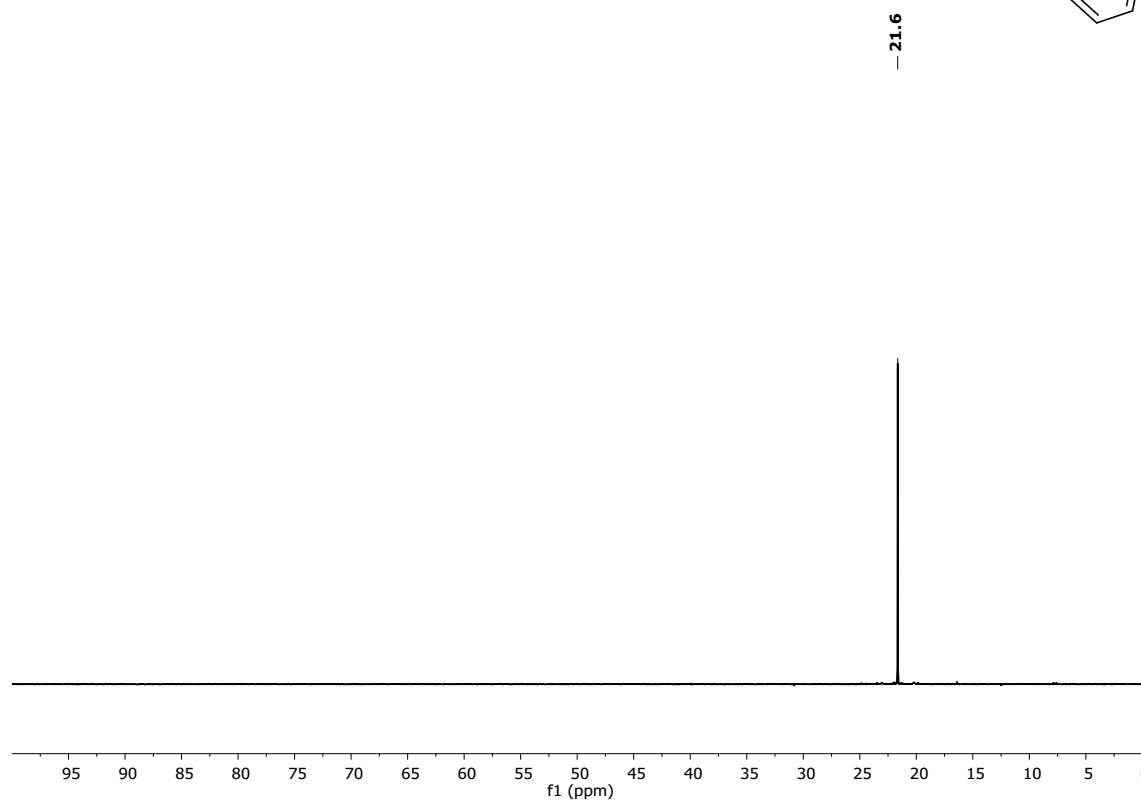

$^1\text{H}$  NMR (500 MHz,  $\text{CDCl}_3$ )

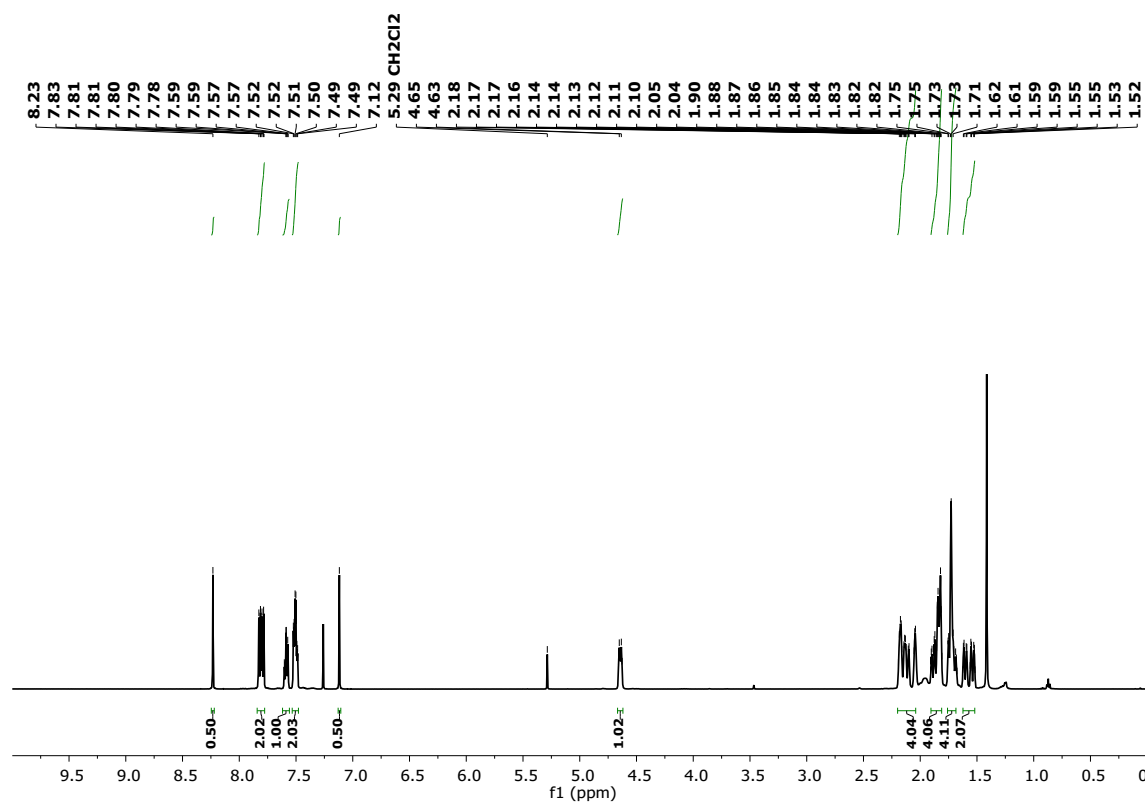



$^{13}\text{C}\{^1\text{H}\}$  NMR (125.8 MHz,  $\text{CDCl}_3$ )

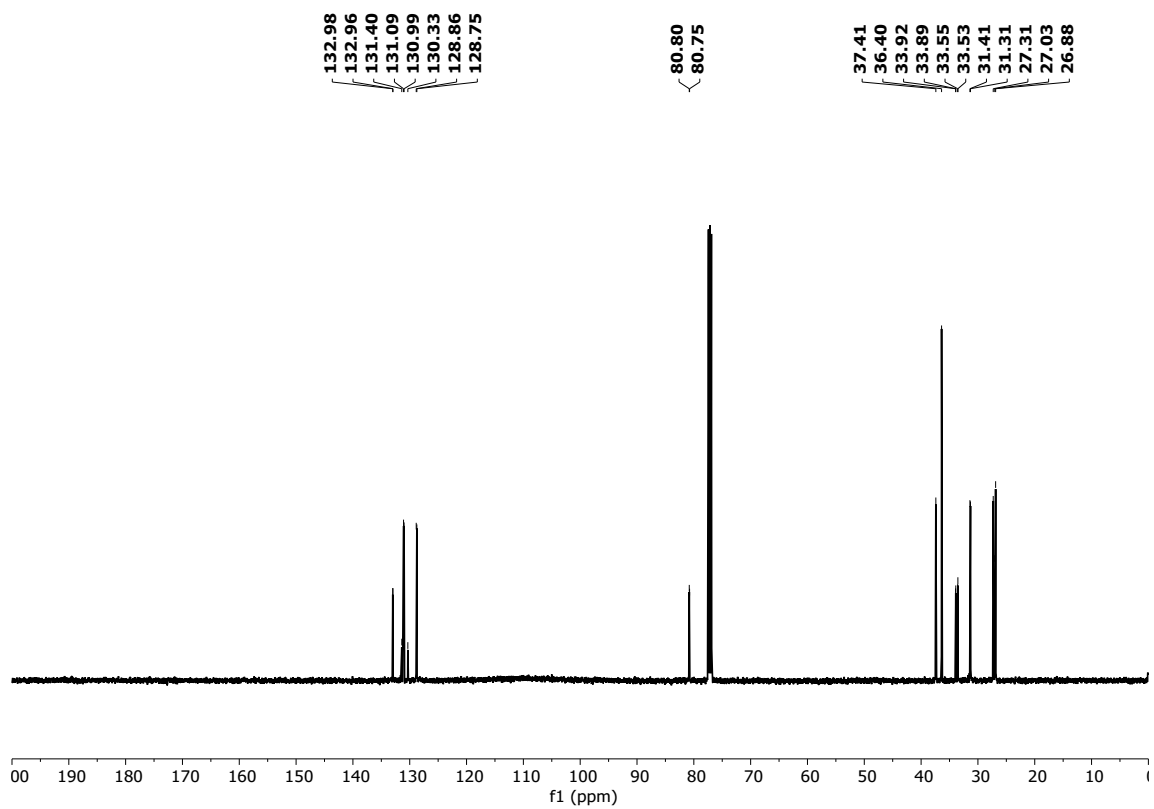

*c*-pentyl phenyl-*H*-phosphinate (**1c**)

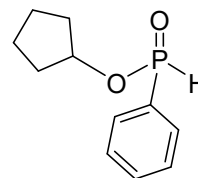

$^{31}\text{P}\{^1\text{H}\}$  NMR (202.5 MHz,  $\text{CDCl}_3$ )

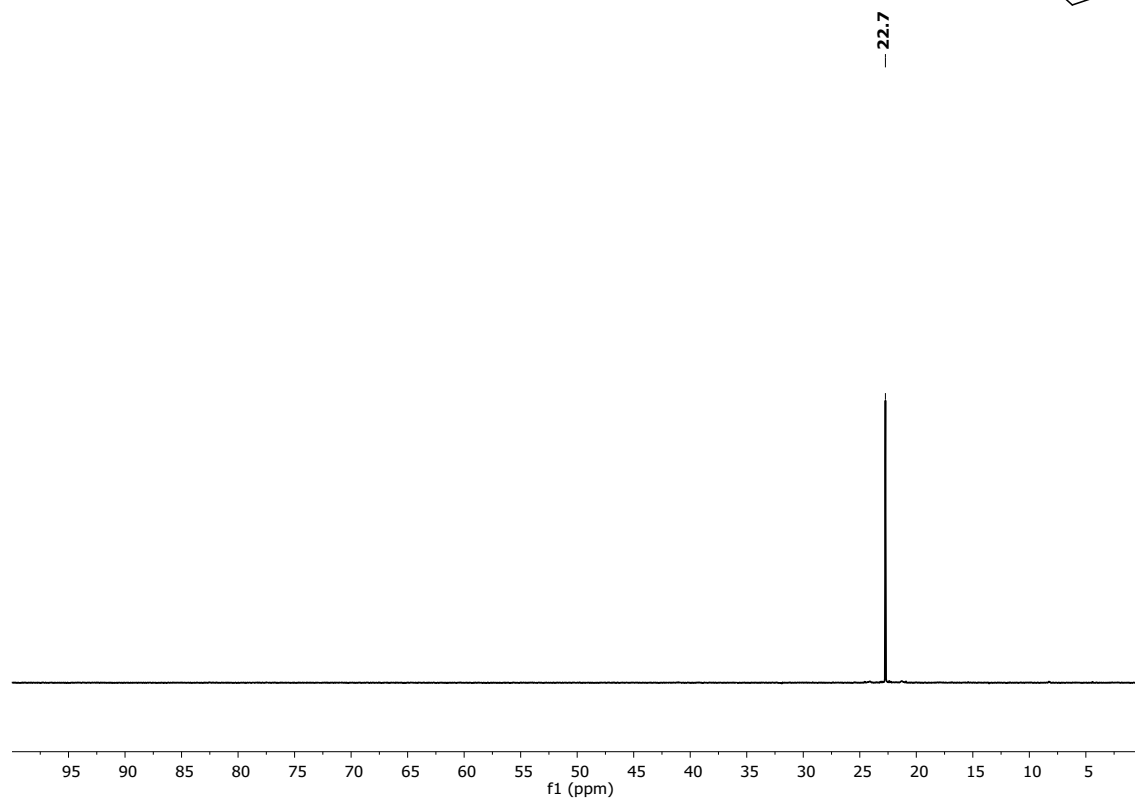

$^1\text{H}$  NMR (500 MHz,  $\text{CDCl}_3$ )

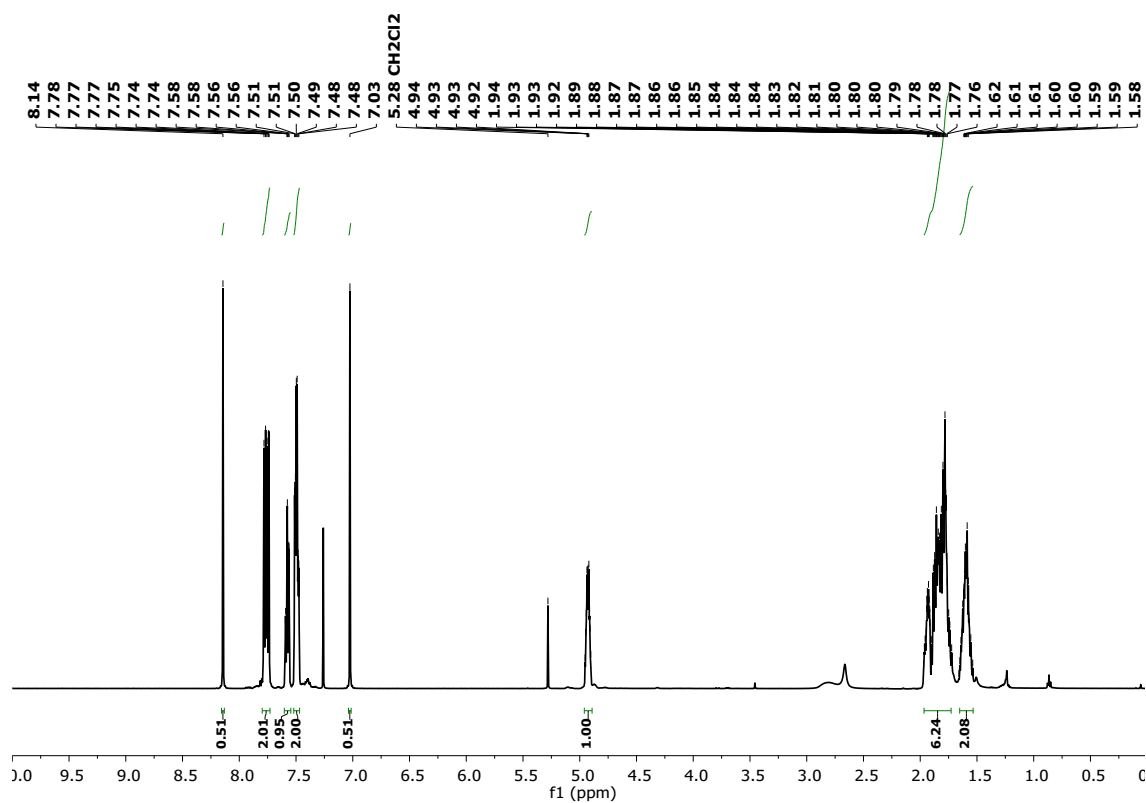

$^{13}\text{C}\{^1\text{H}\}$  NMR (125.8 MHz,  $\text{CDCl}_3$ )

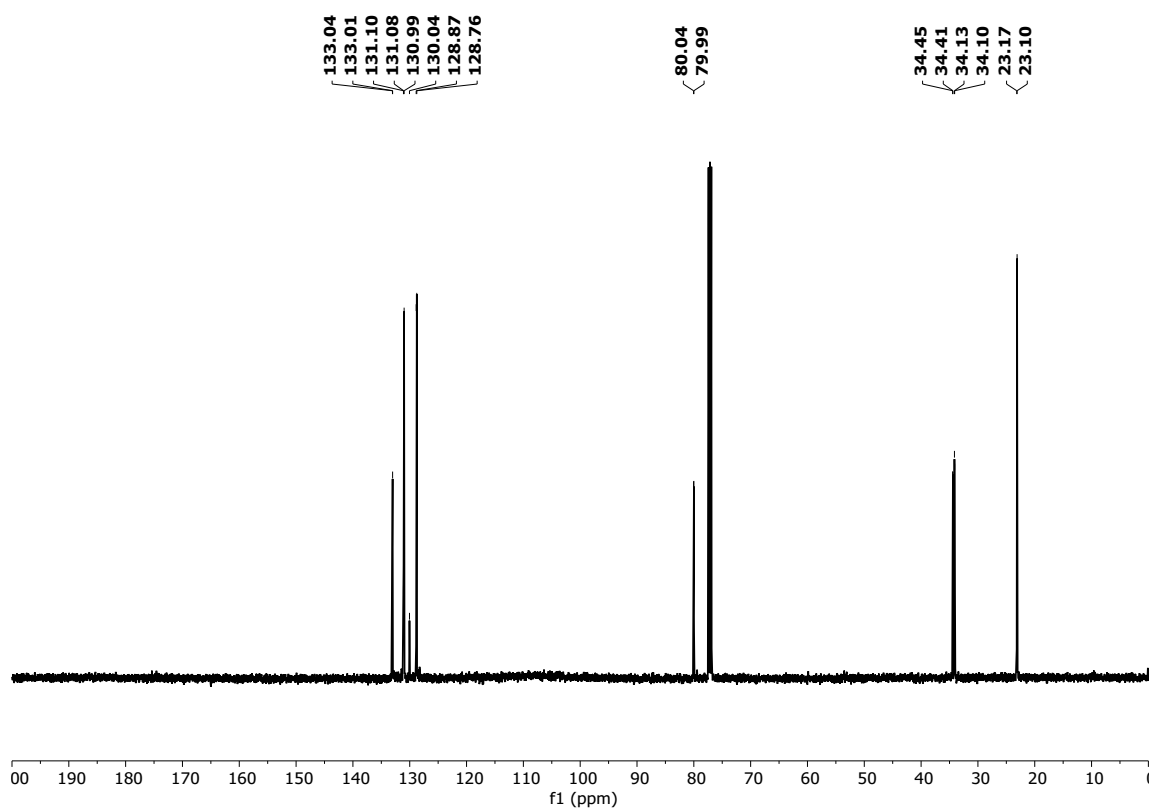

*c*-hexyl phenyl-*H*-phosphinate (**1d**)

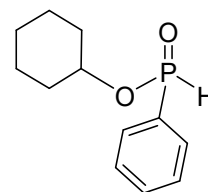

$^{31}\text{P}\{^1\text{H}\}$  NMR (202.5 MHz,  $\text{CDCl}_3$ )

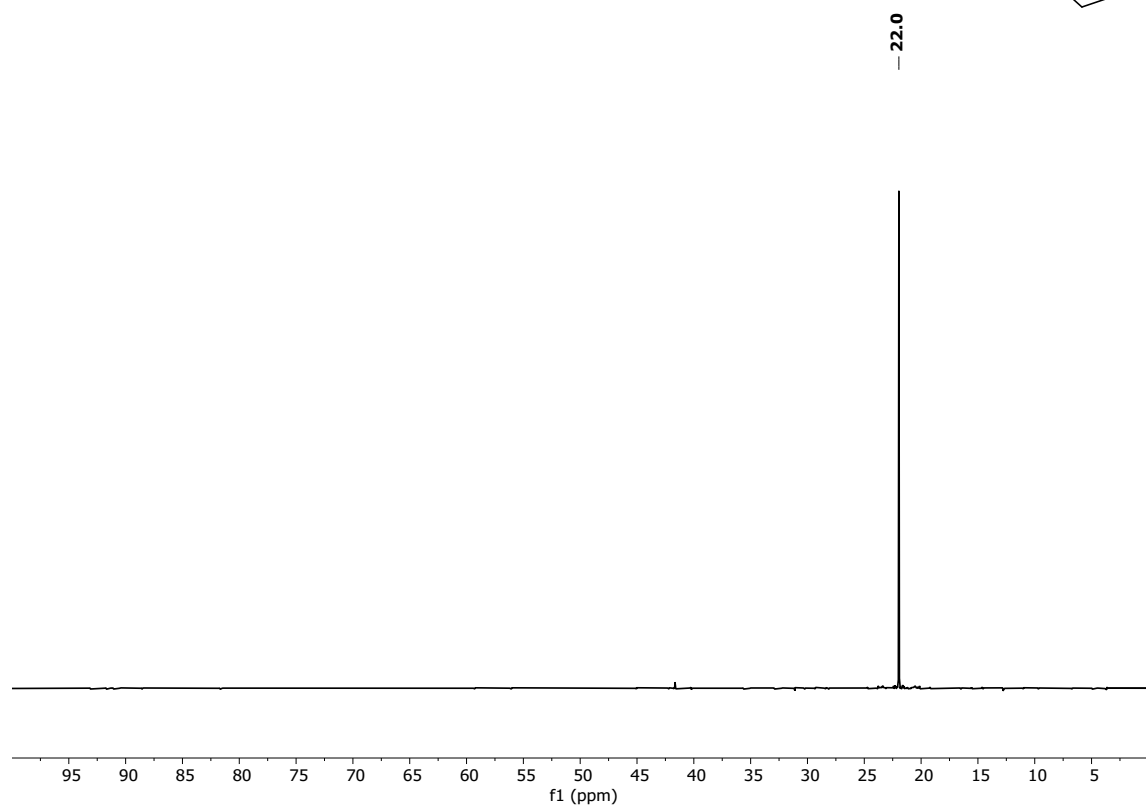

$^1\text{H}$  NMR (500 MHz,  $\text{CDCl}_3$ )

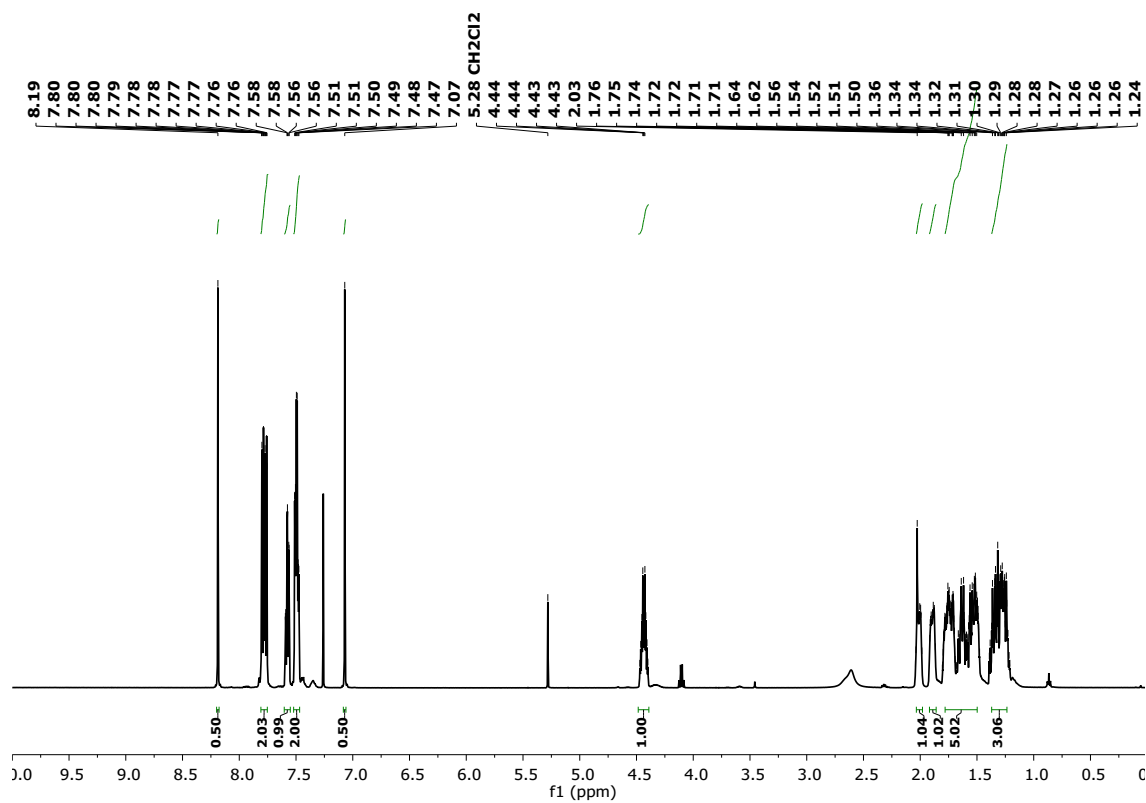

$^{13}\text{C}\{^1\text{H}\}$  NMR (125.8 MHz,  $\text{CDCl}_3$ )

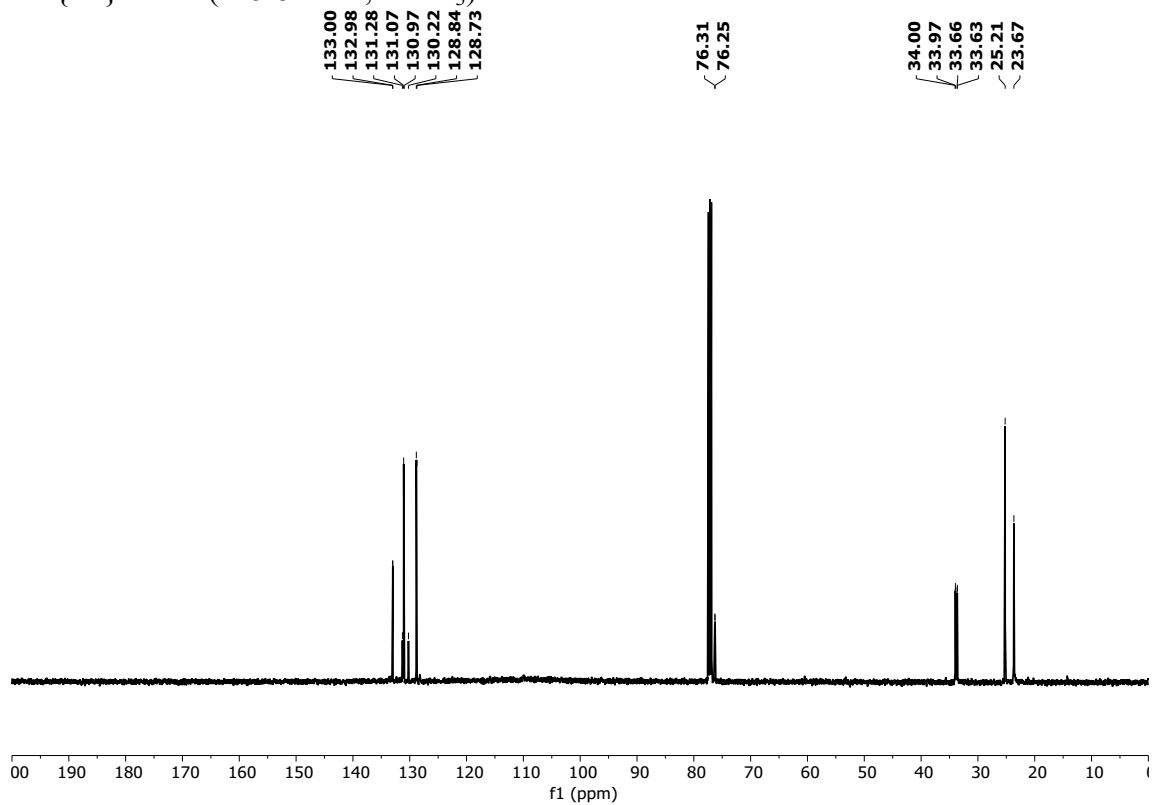

(1*R*,2*S*,5*R*)-2-isopropyl-5-methyl-*c*-hexyl phenyl-*H*-phosphinate (**1e**)

$^{31}\text{P}\{^1\text{H}\}$  NMR (202.5 MHz,  $\text{CDCl}_3$ )

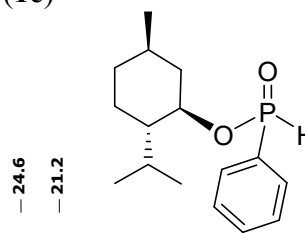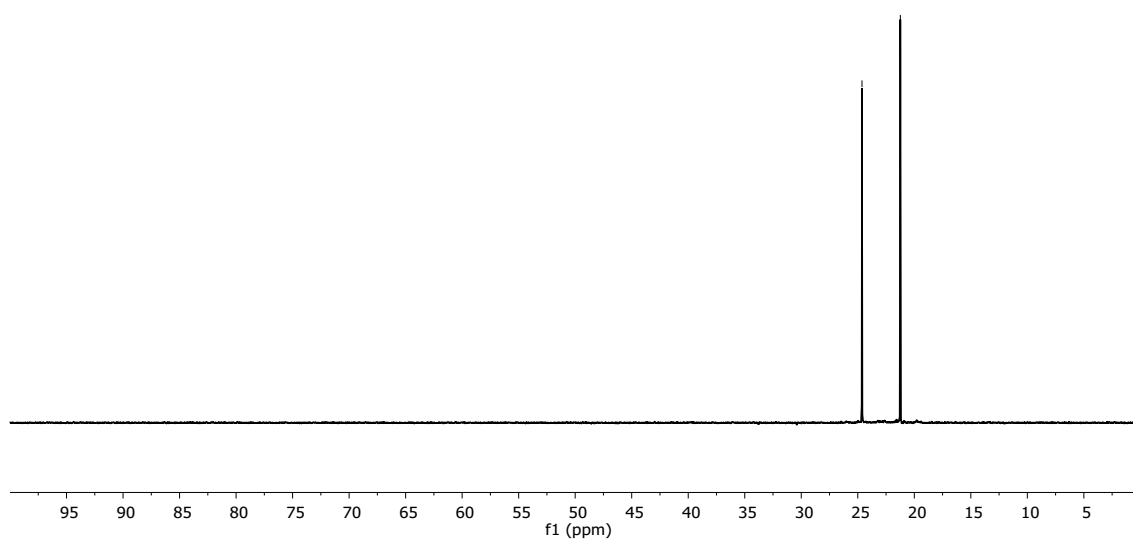

$^1\text{H}$  NMR (500 MHz,  $\text{CDCl}_3$ )

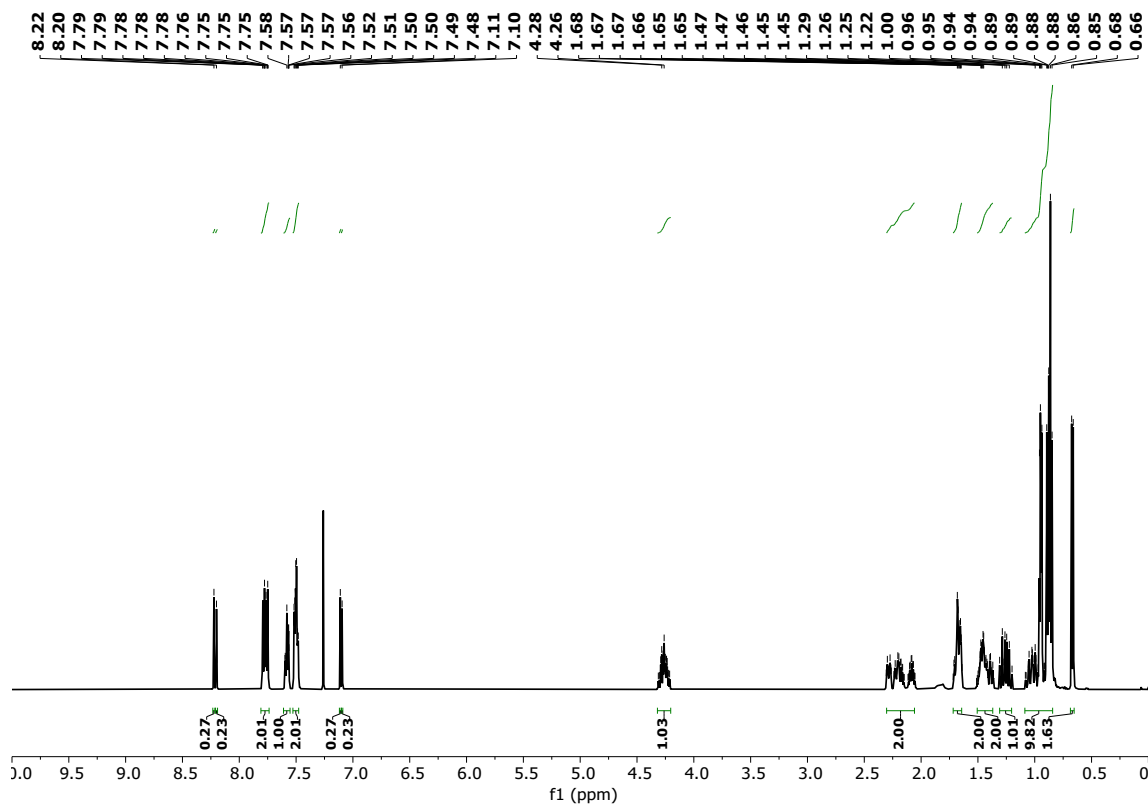

$^{13}\text{C}\{^1\text{H}\}$  NMR (125.8 MHz,  $\text{CDCl}_3$ )

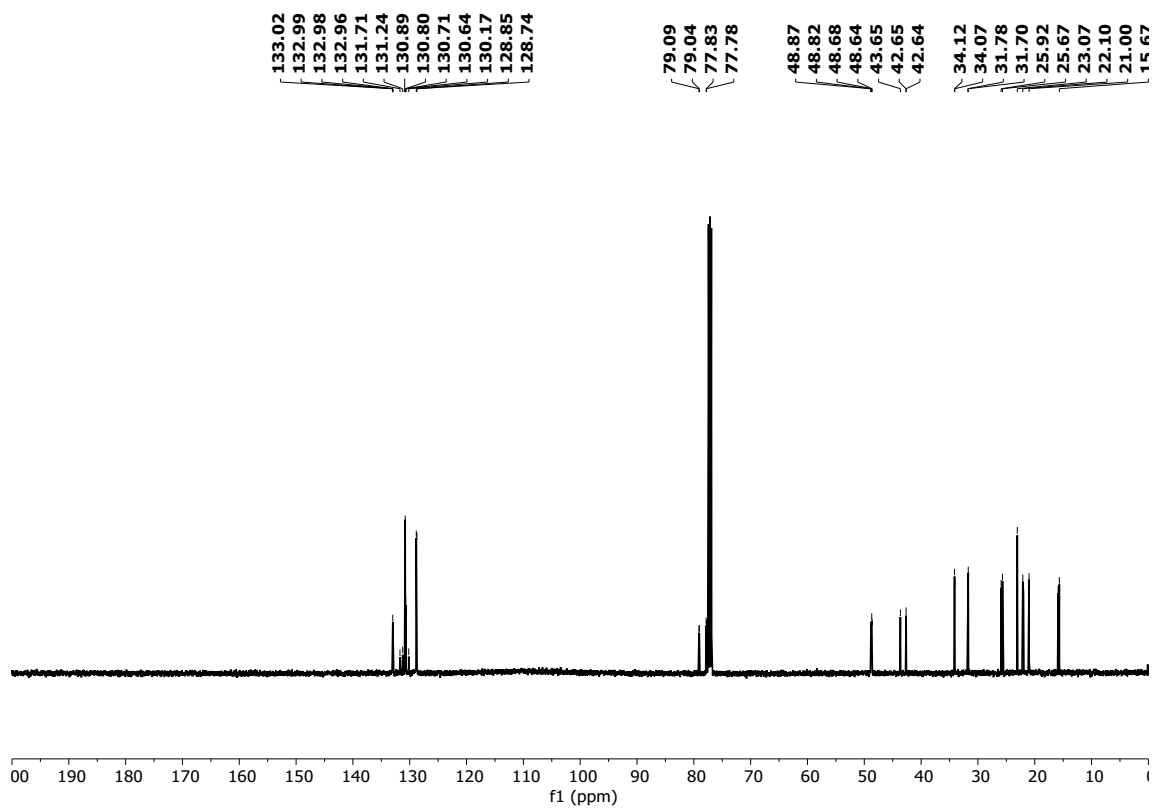

*c*-heptyl phenyl-*H*-phosphinate (**1f**)

$^1\text{P}\{^1\text{H}\}$  NMR (202.5 MHz,  $\text{CDCl}_3$ )

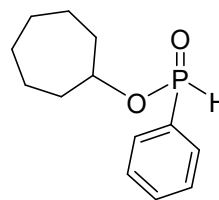

-22.1

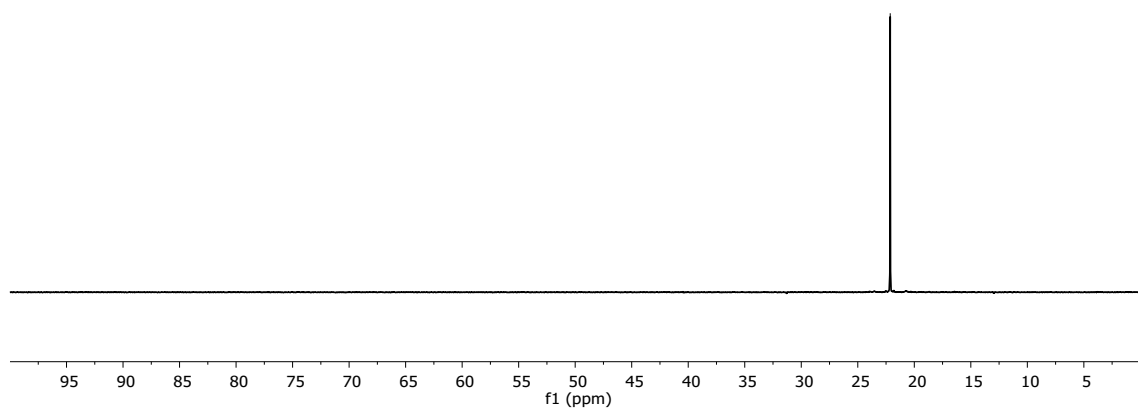

$^1\text{H}$  NMR (500 MHz,  $\text{CDCl}_3$ )

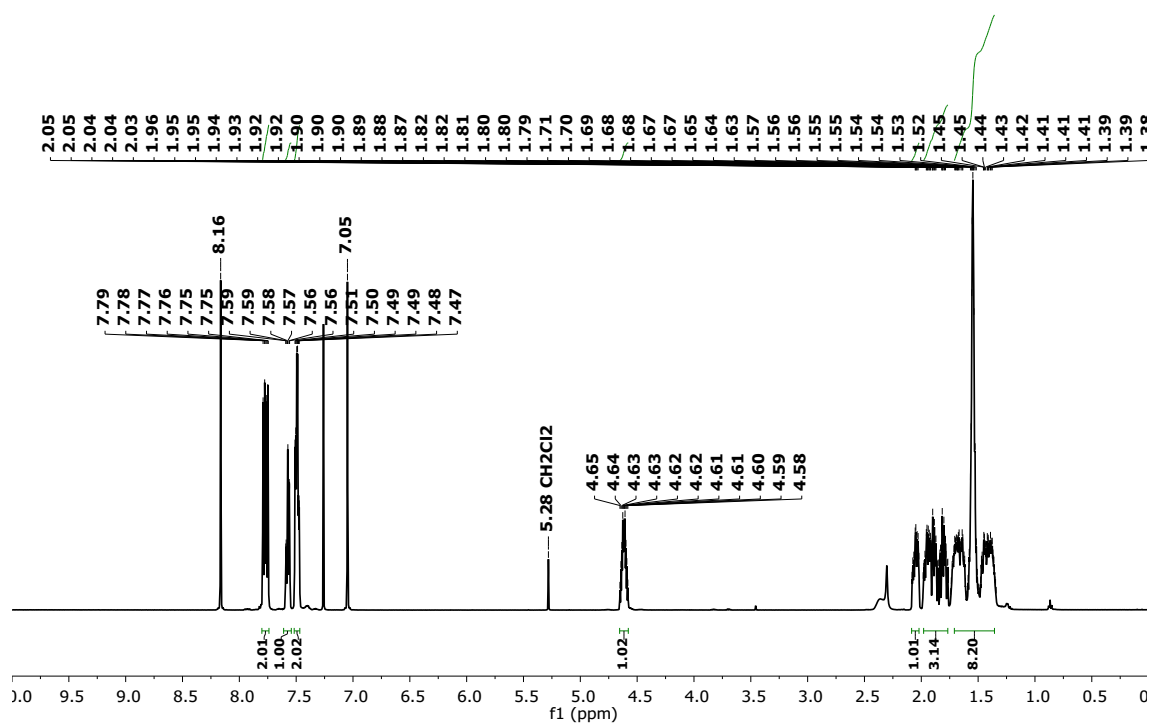



$^{13}\text{C}\{^1\text{H}\}$  NMR (125.8 MHz,  $\text{CDCl}_3$ )

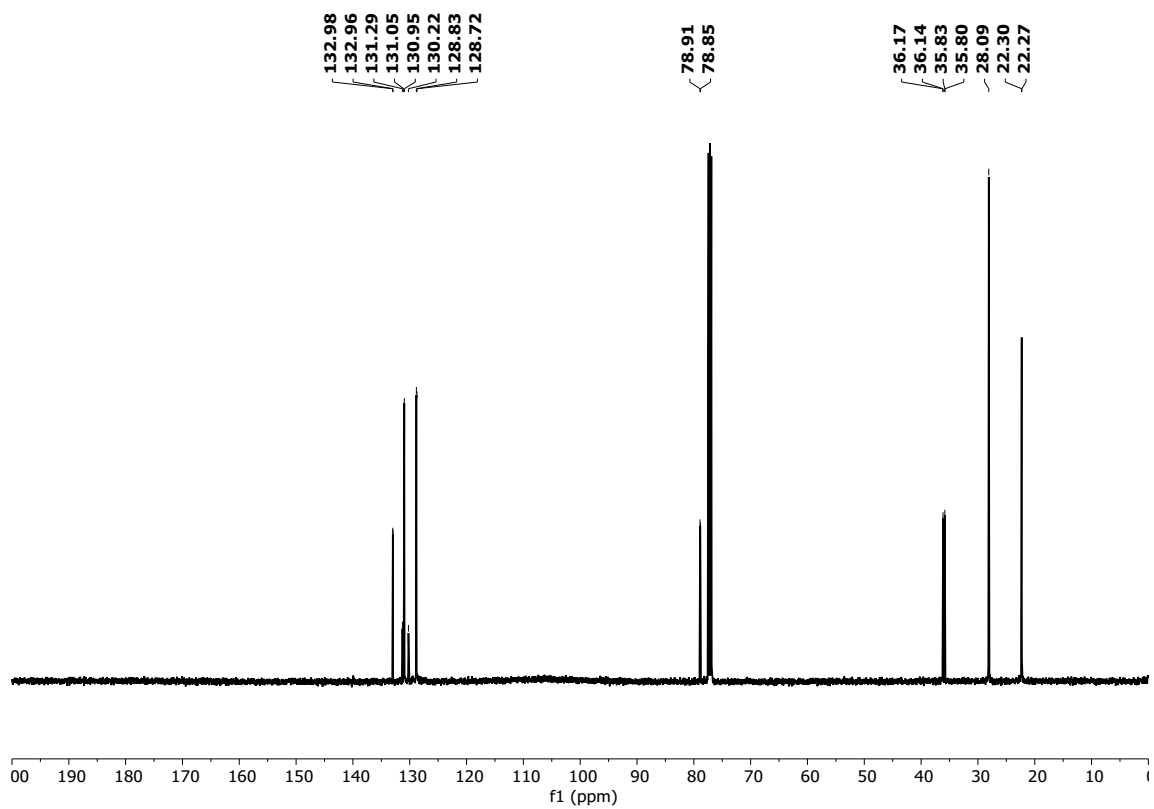

1-methyl-*c*-hexyl phenyl-*H*-phosphinate (**1g**)

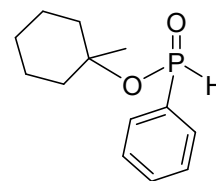

$^{31}\text{P}\{^1\text{H}\}$  NMR (202.5 MHz,  $\text{CDCl}_3$ )

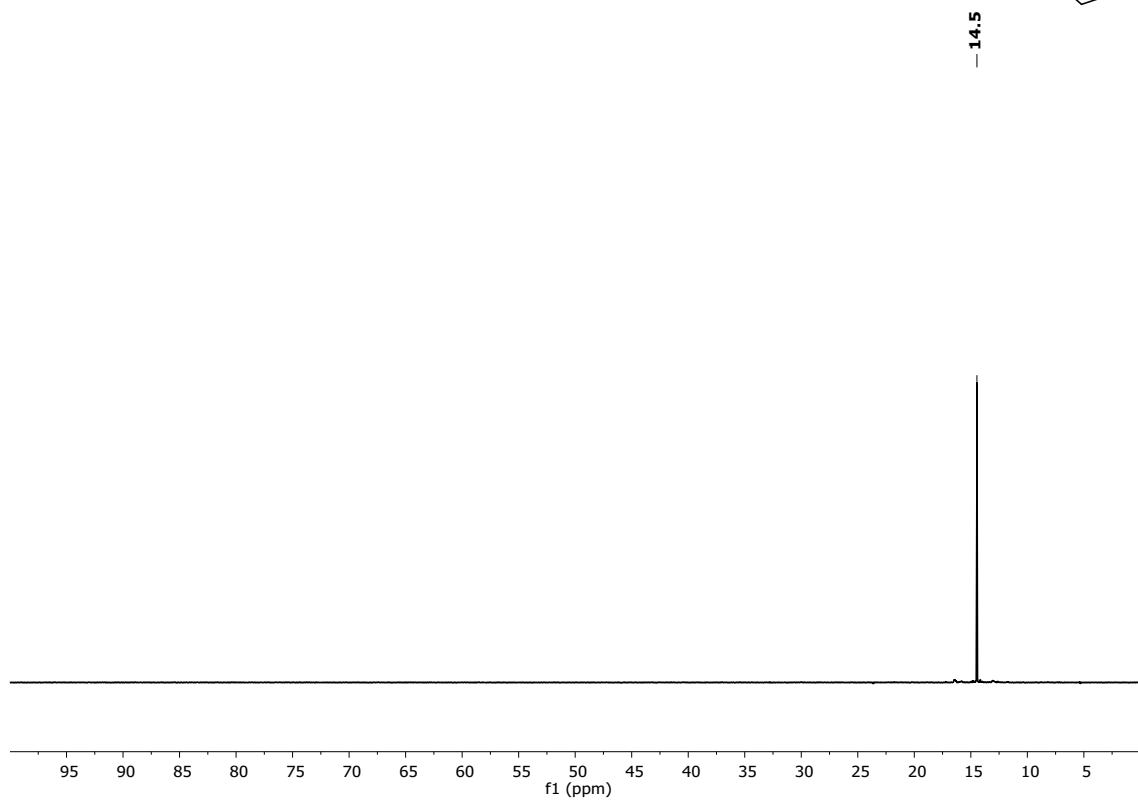

$^1\text{H}$  NMR (500 MHz,  $\text{CDCl}_3$ )

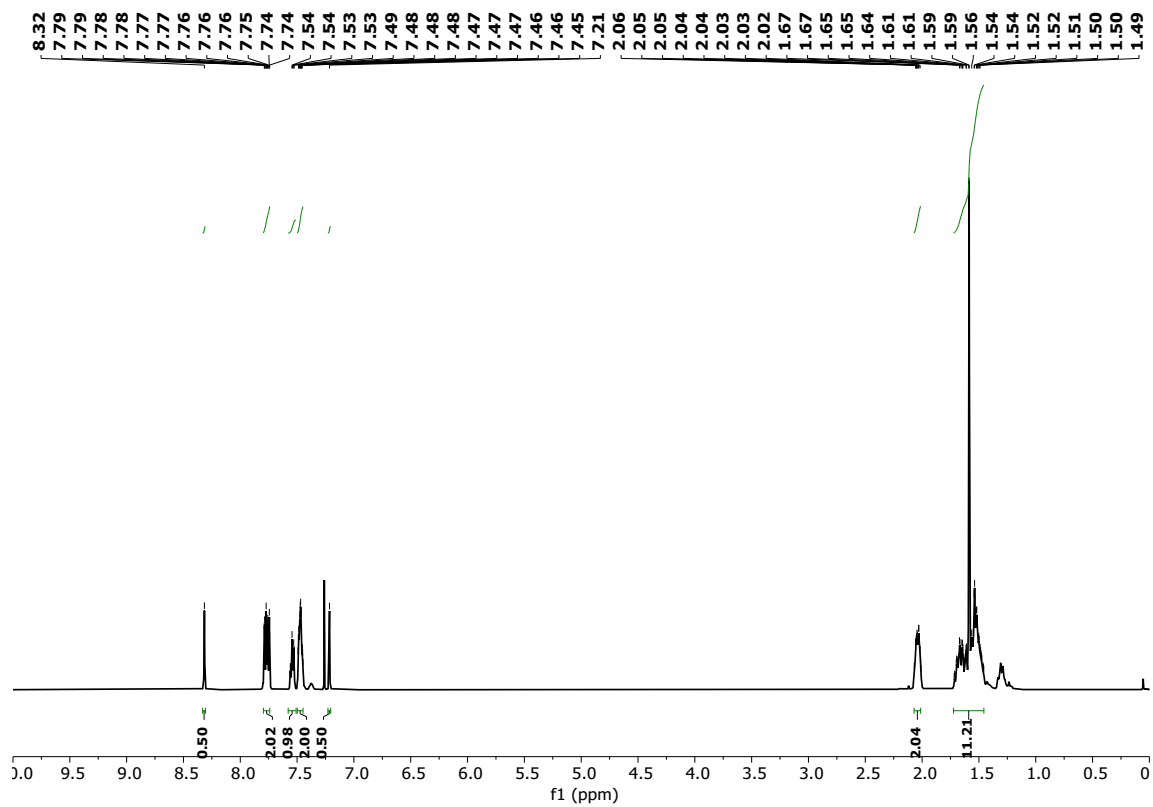

$^{13}\text{C}\{^1\text{H}\}$  NMR (125.8 MHz,  $\text{CDCl}_3$ )

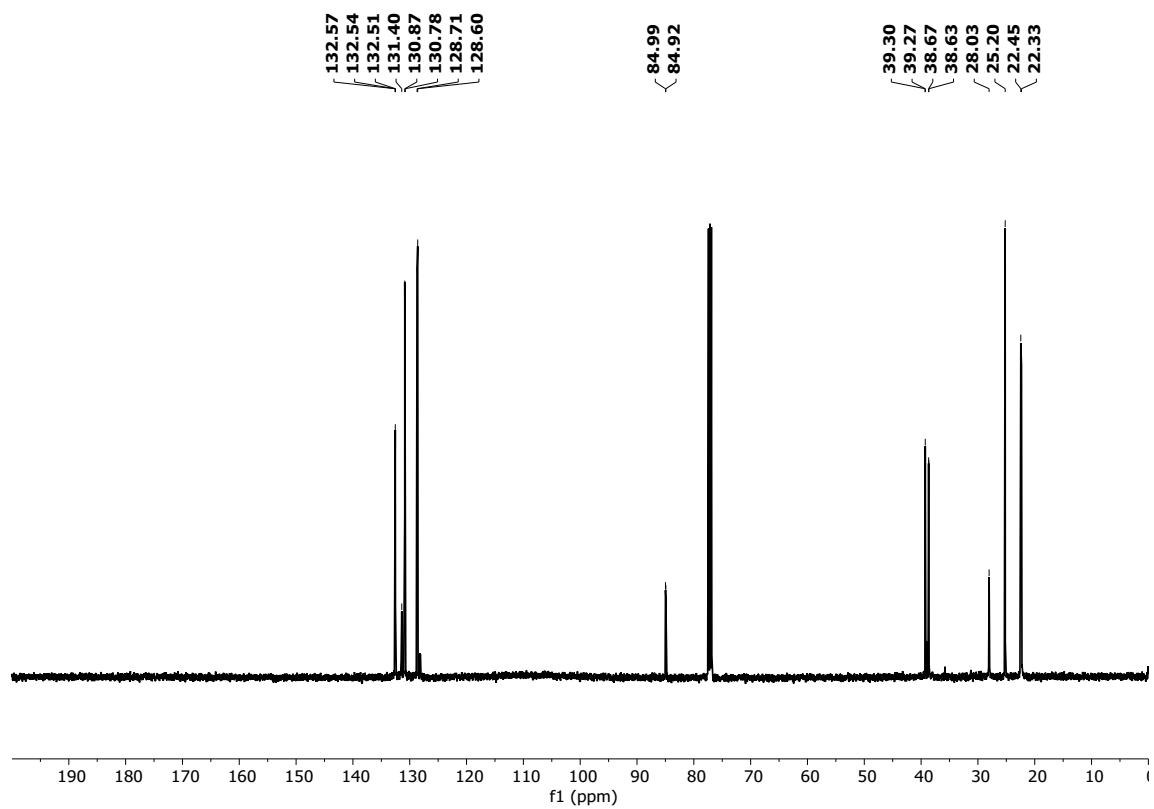

*t*-butyl phenyl-*H*-phosphinate (**1h**)

$^{31}\text{P}\{^1\text{H}\}$  NMR (202.5 MHz,  $\text{CDCl}_3$ )

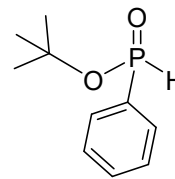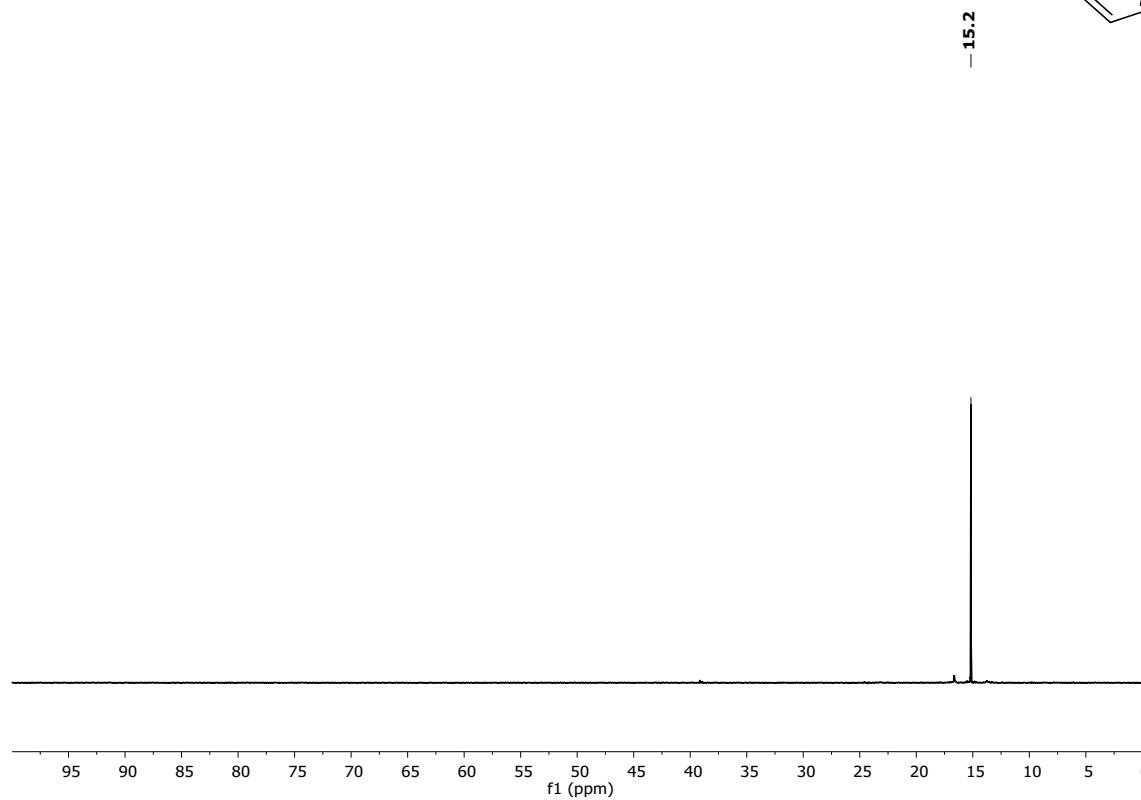

$^1\text{H}$  NMR (500 MHz,  $\text{CDCl}_3$ )

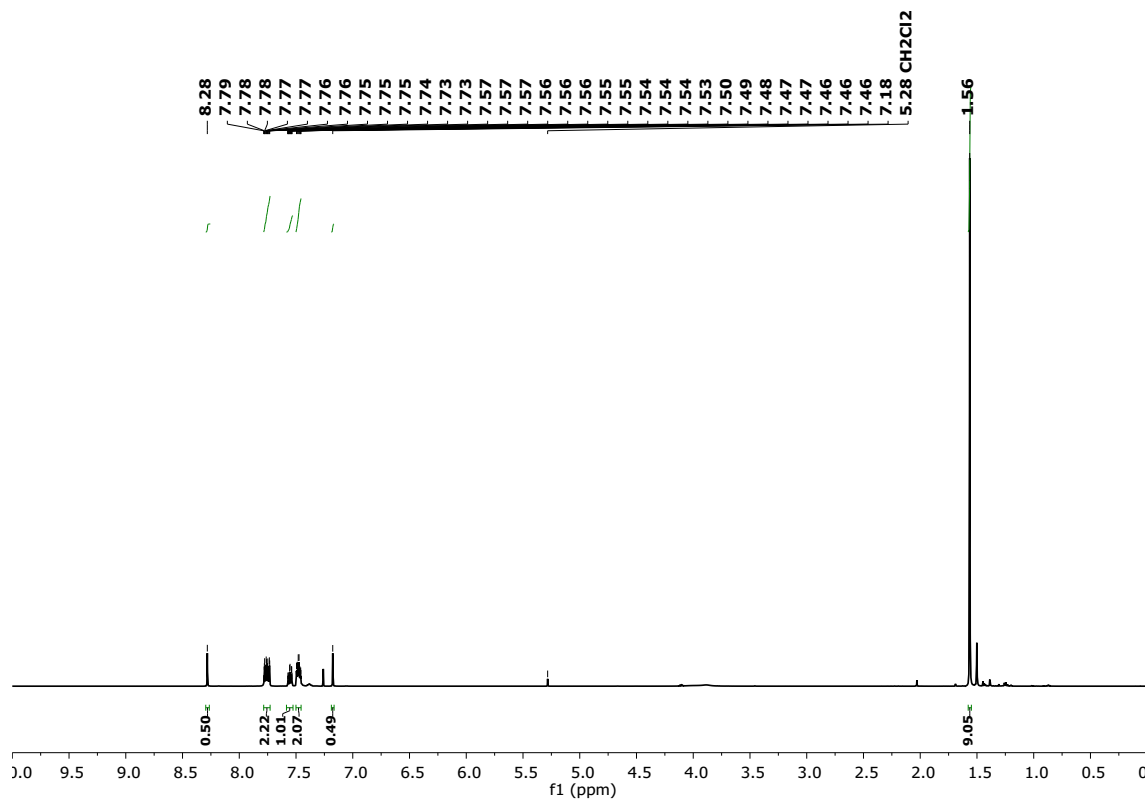

$^{13}\text{C}\{^1\text{H}\}$  NMR (125.8 MHz,  $\text{CDCl}_3$ )

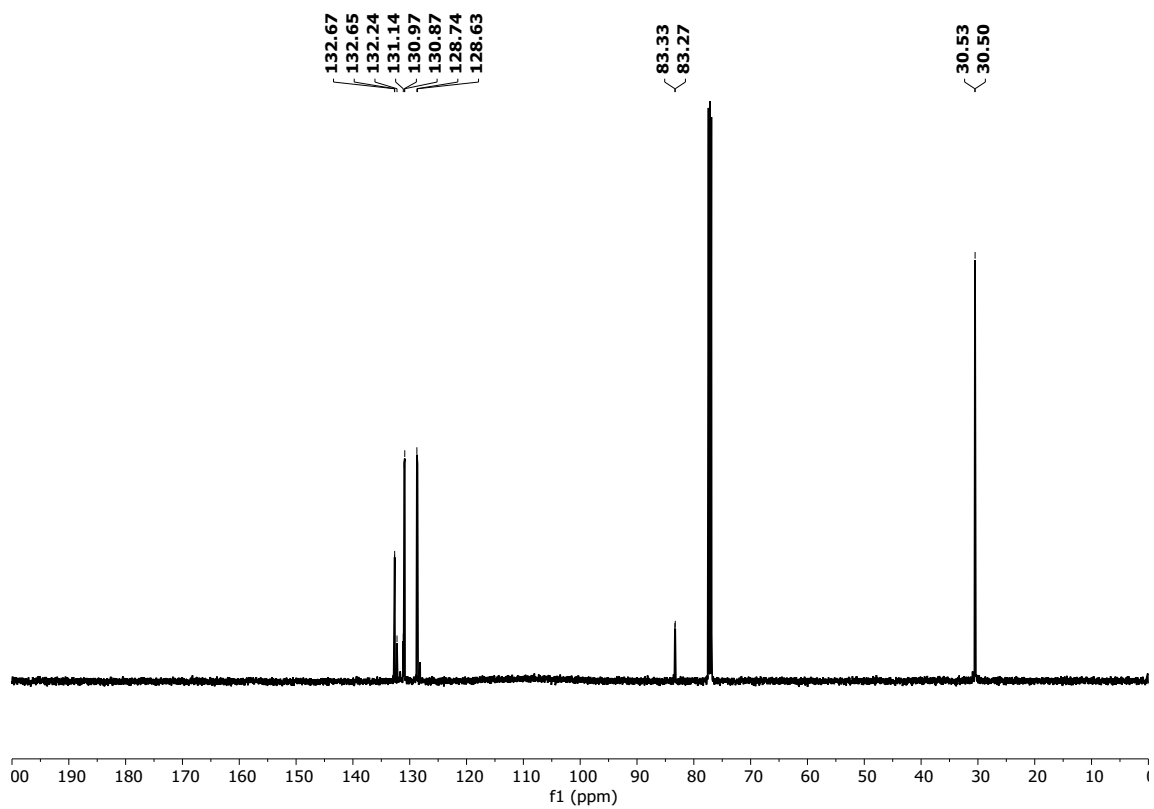

2,4-dimethyl-pent-3-yl phenyl-*H*-phosphinate (**1i**)

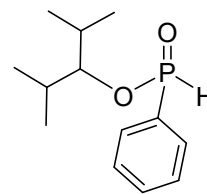

$^{31}\text{P}\{^1\text{H}\}$  NMR (202.5 MHz,  $\text{CDCl}_3$ )

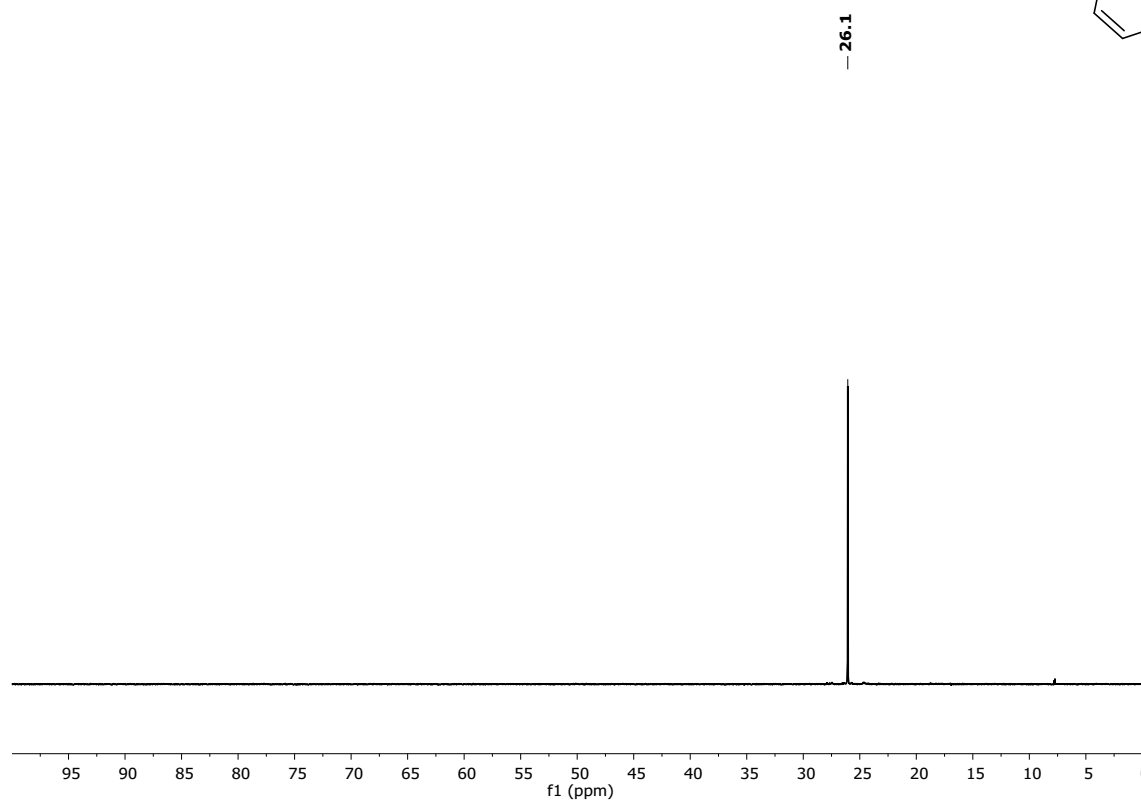

$^1\text{H}$  NMR (500 MHz,  $\text{CDCl}_3$ )

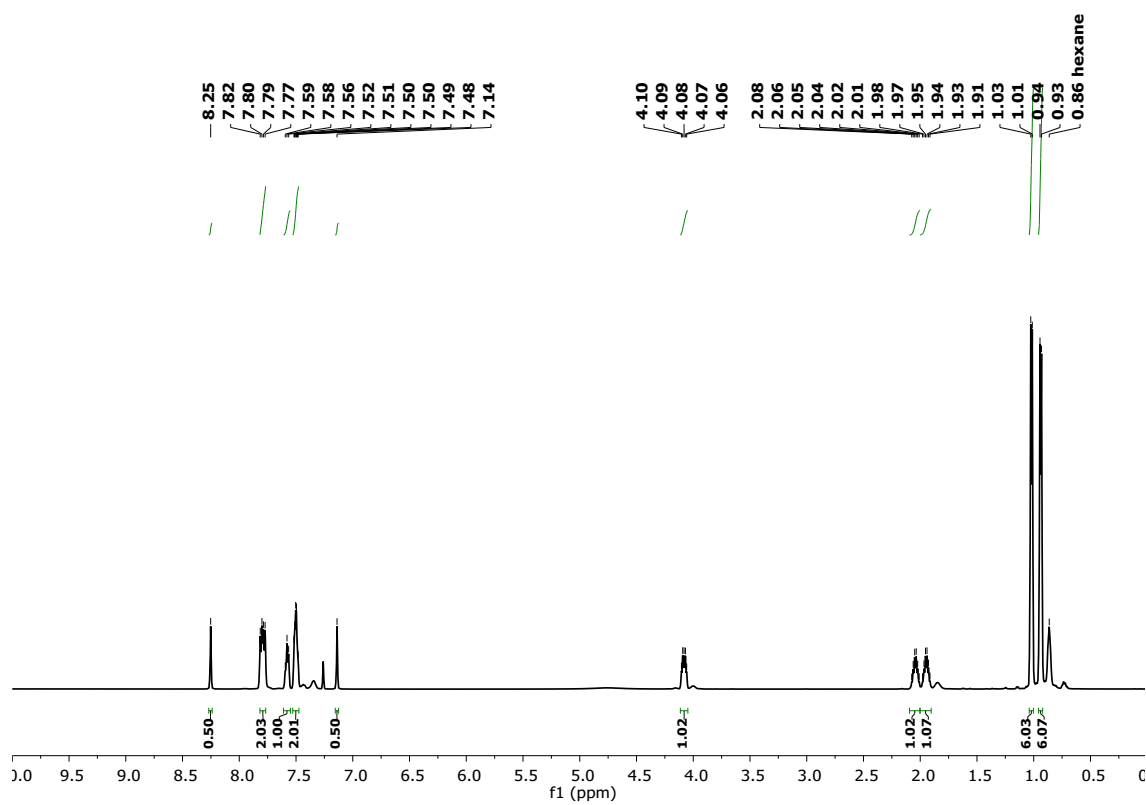

$^{13}\text{C}\{^1\text{H}\}$  NMR (125.8 MHz,  $\text{CDCl}_3$ )

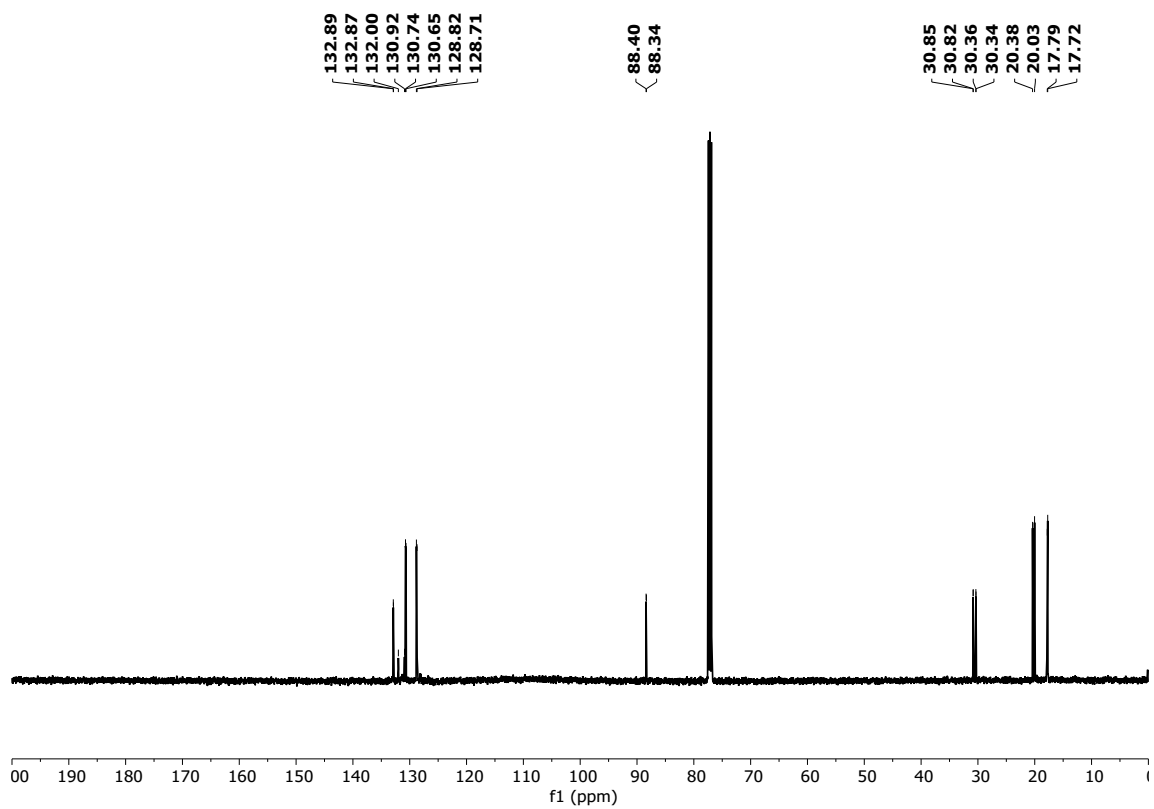

benzyl phenyl-*H*-phosphinate (**1j**)

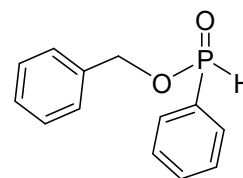

$^{31}\text{P}\{^1\text{H}\}$  NMR (202.5 MHz,  $\text{CDCl}_3$ )

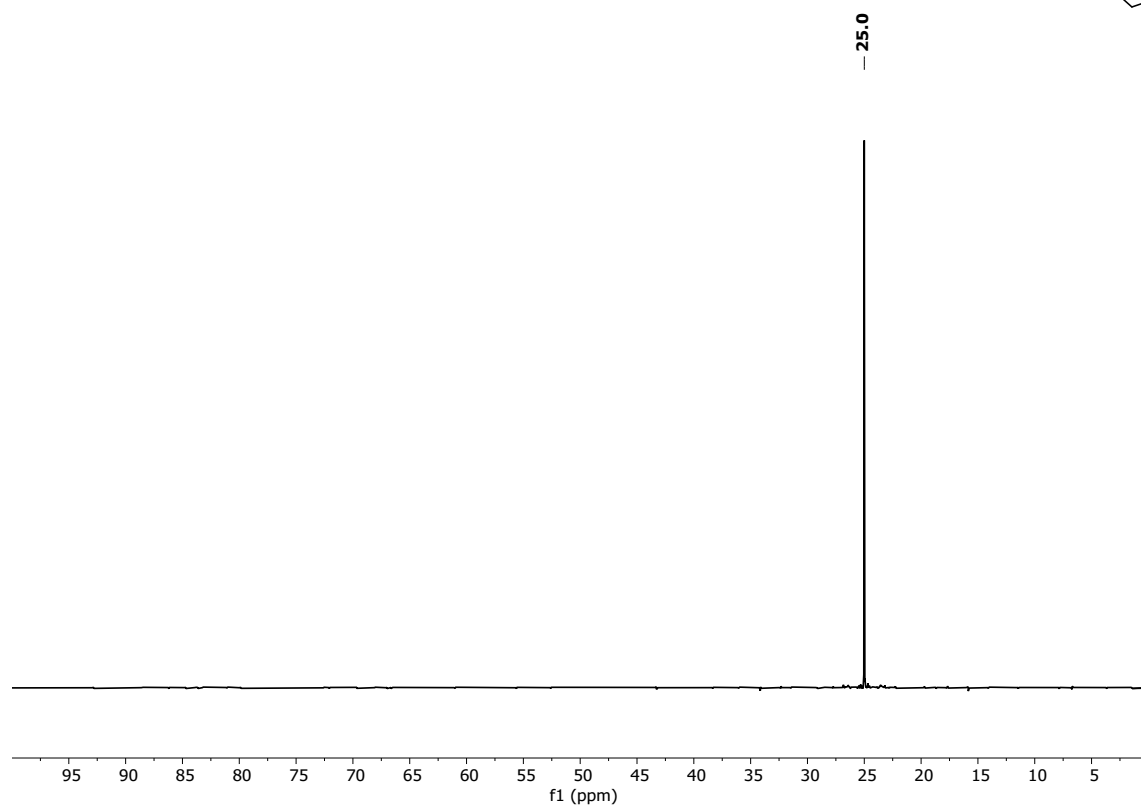

$^1\text{H}$  NMR (500 MHz,  $\text{CDCl}_3$ )

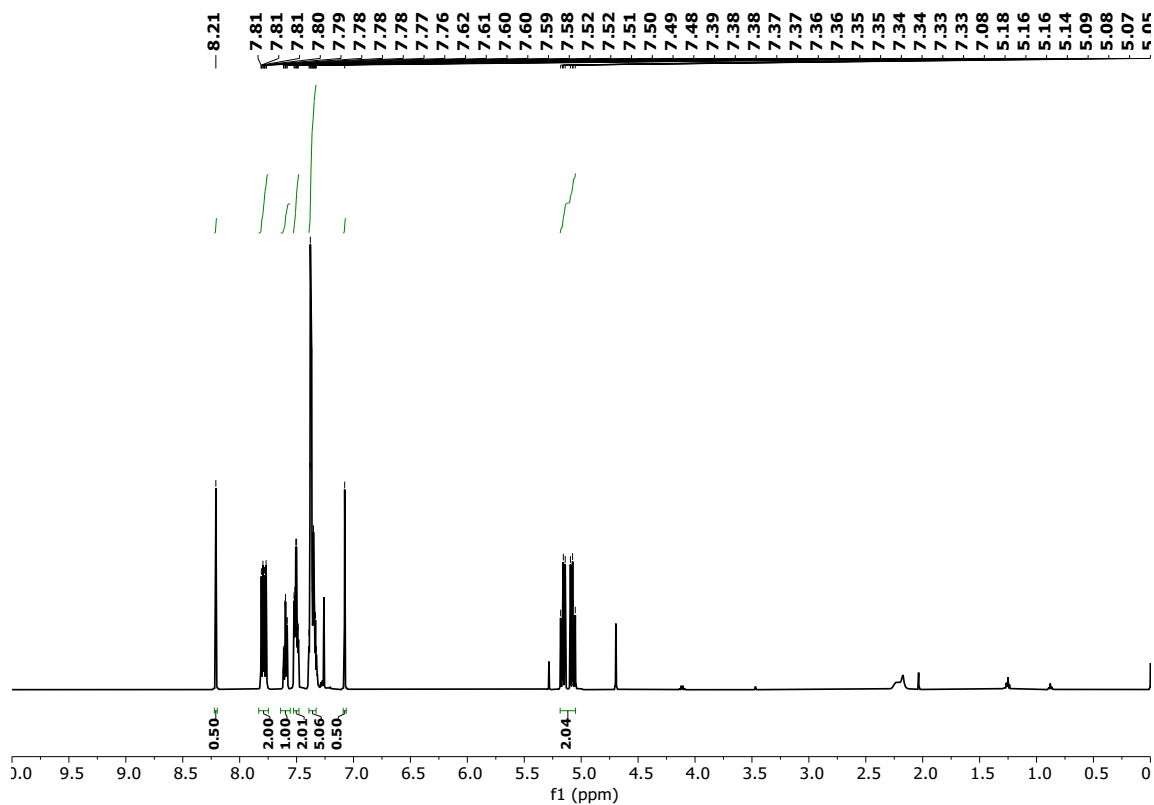



$^{13}\text{C}\{^1\text{H}\}$  NMR (125.8 MHz,  $\text{CDCl}_3$ )

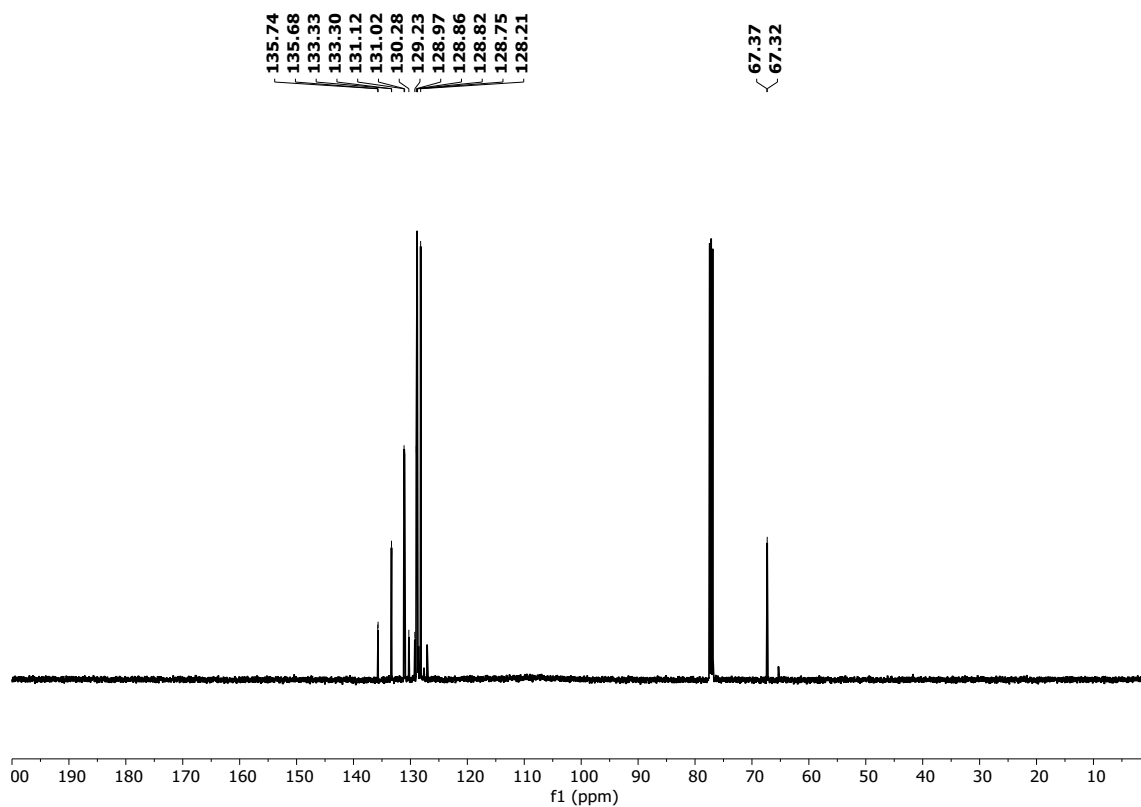

1-adamantyl (2-methylphenyl)-*H*-phosphinate (**1k**)

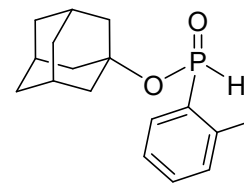

$^{31}\text{P}\{^1\text{H}\}$  NMR (202.5 MHz,  $\text{CDCl}_3$ )

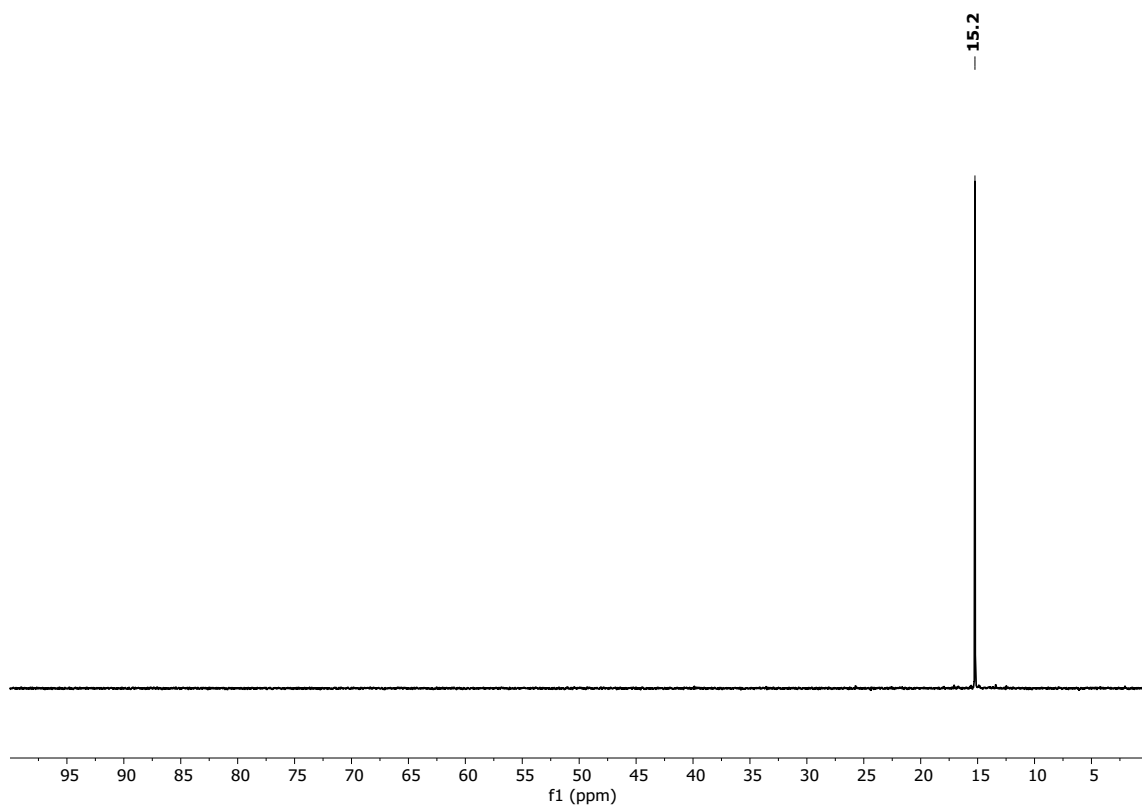

$^1\text{H}$  NMR (500 MHz,  $\text{CDCl}_3$ )

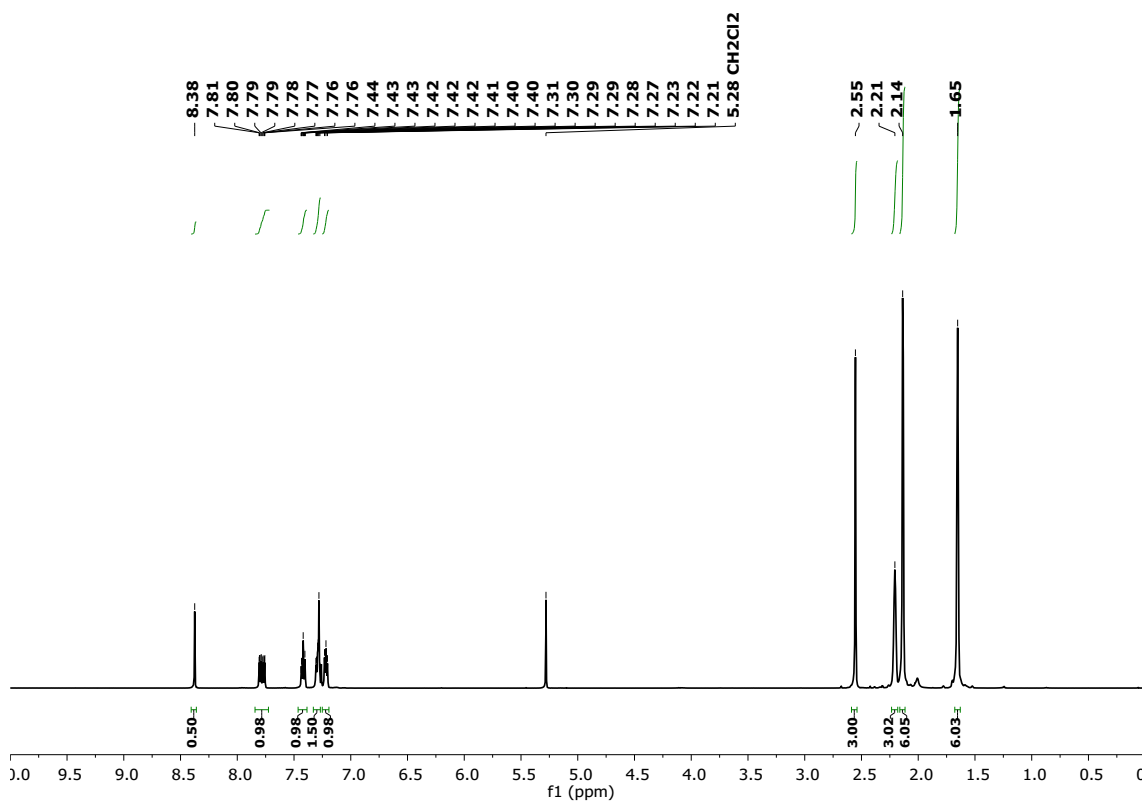

$^{13}\text{C}\{^1\text{H}\}$  NMR (125.8 MHz,  $\text{CDCl}_3$ )

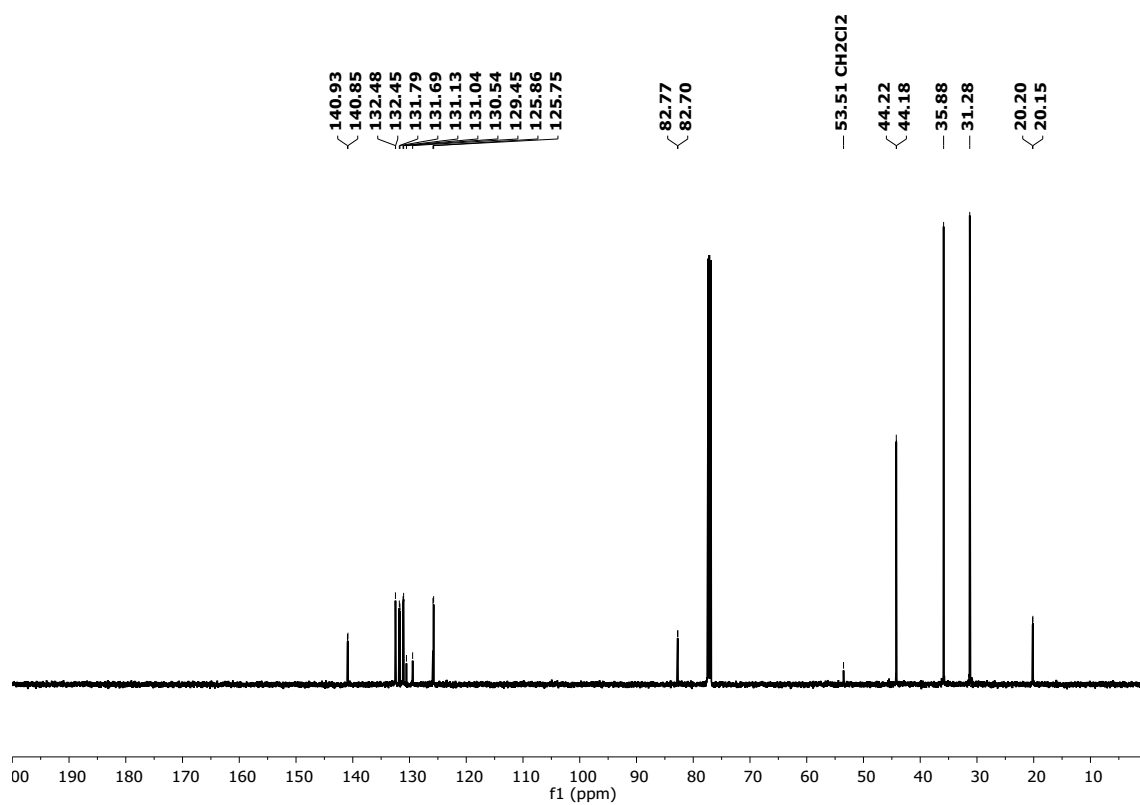

1-adamantyl (3-methylphenyl)-*H*-phosphinate (**11**)

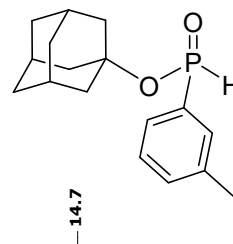

$^{31}\text{P}\{^1\text{H}\}$  NMR (202.5 MHz,  $\text{CDCl}_3$ )

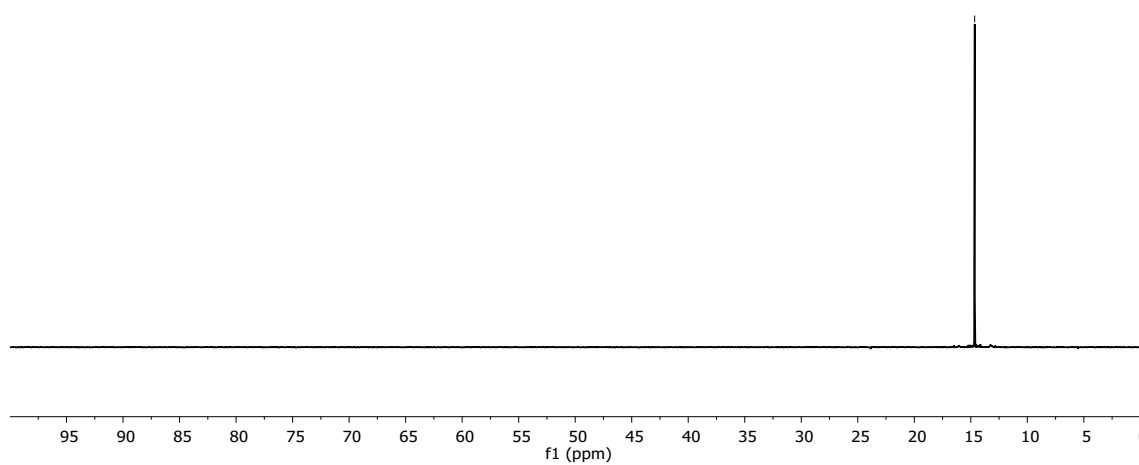

$^1\text{H}$  NMR (500 MHz,  $\text{CDCl}_3$ )

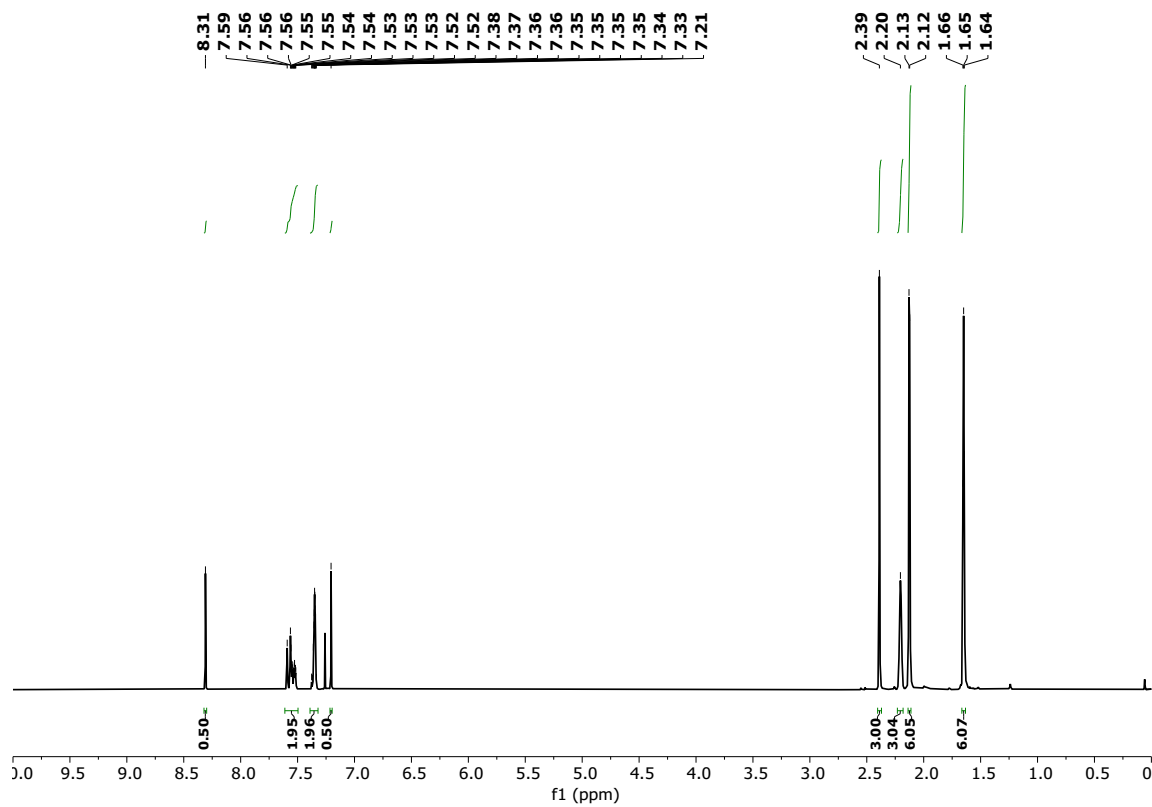

$^{13}\text{C}\{^1\text{H}\}$  NMR (125.8 MHz,  $\text{CDCl}_3$ )

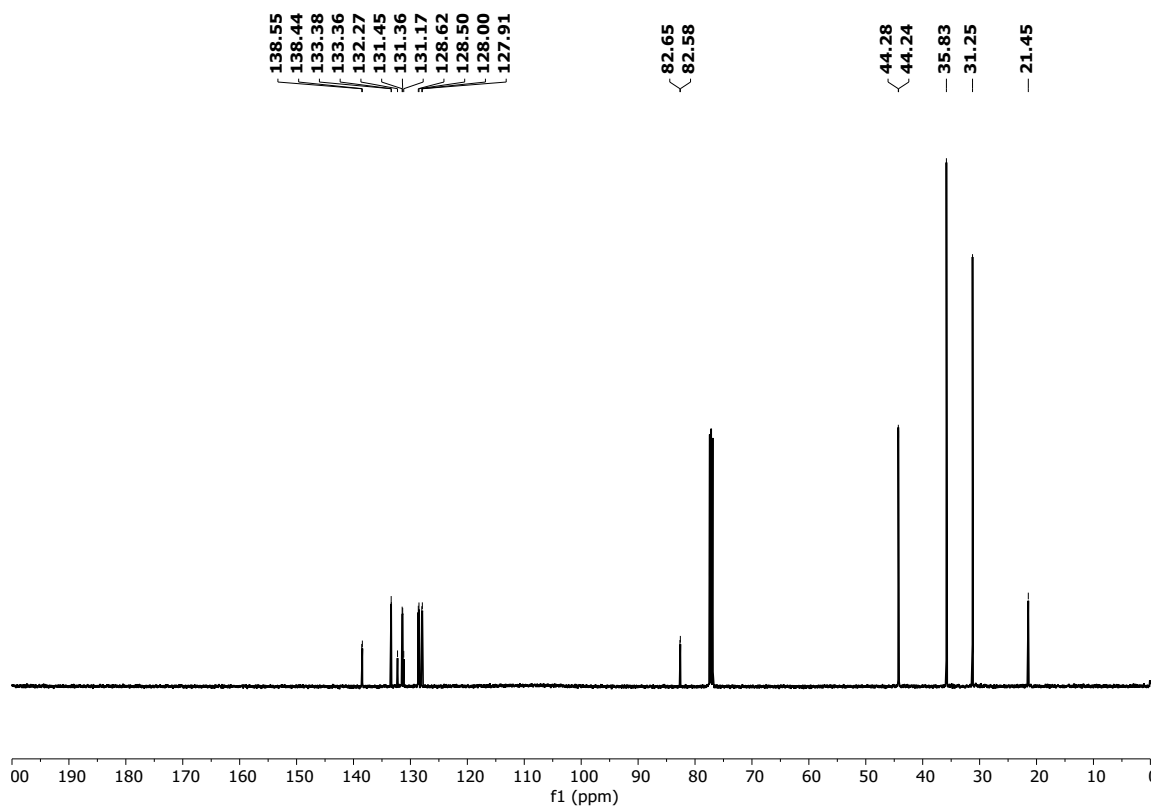

1-adamantyl (4-methylphenyl)-*H*-phosphinate (**1m**)

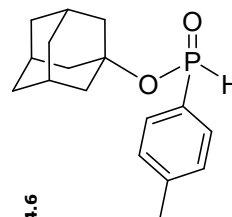

$^{31}\text{P}\{^1\text{H}\}$  NMR (202.5 MHz,  $\text{CDCl}_3$ )

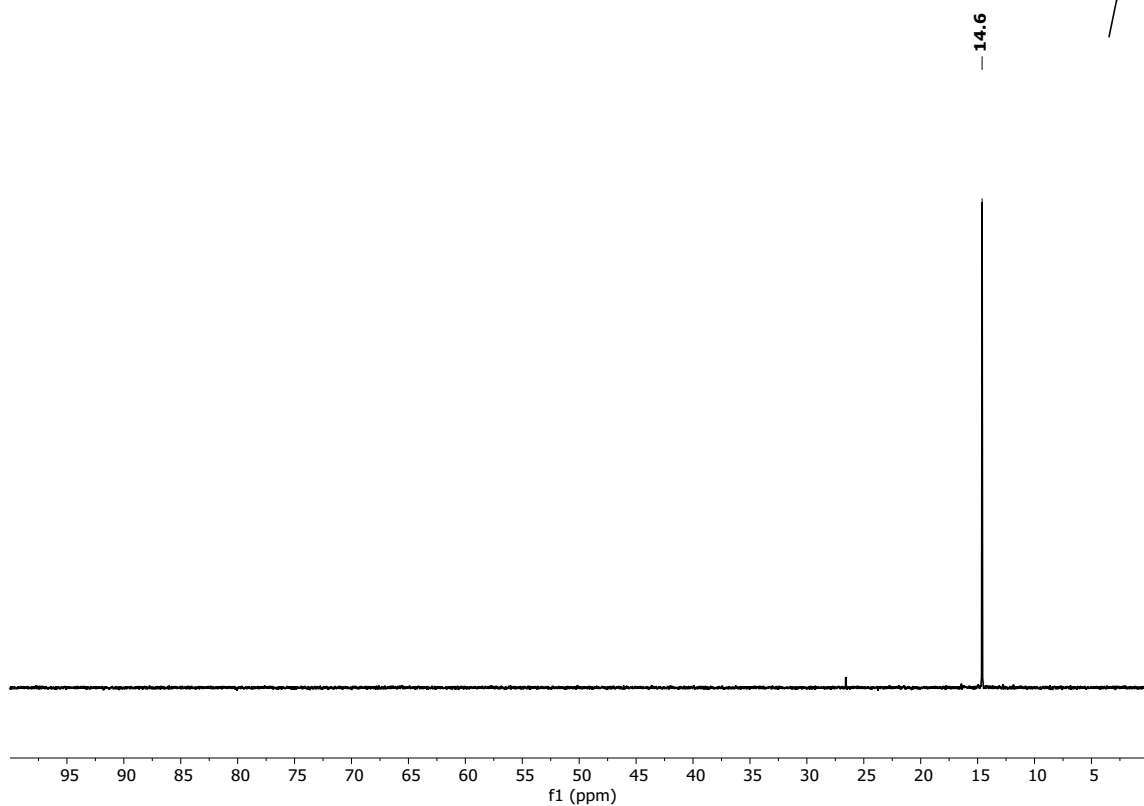

$^1\text{H}$  NMR (500 MHz,  $\text{CDCl}_3$ )

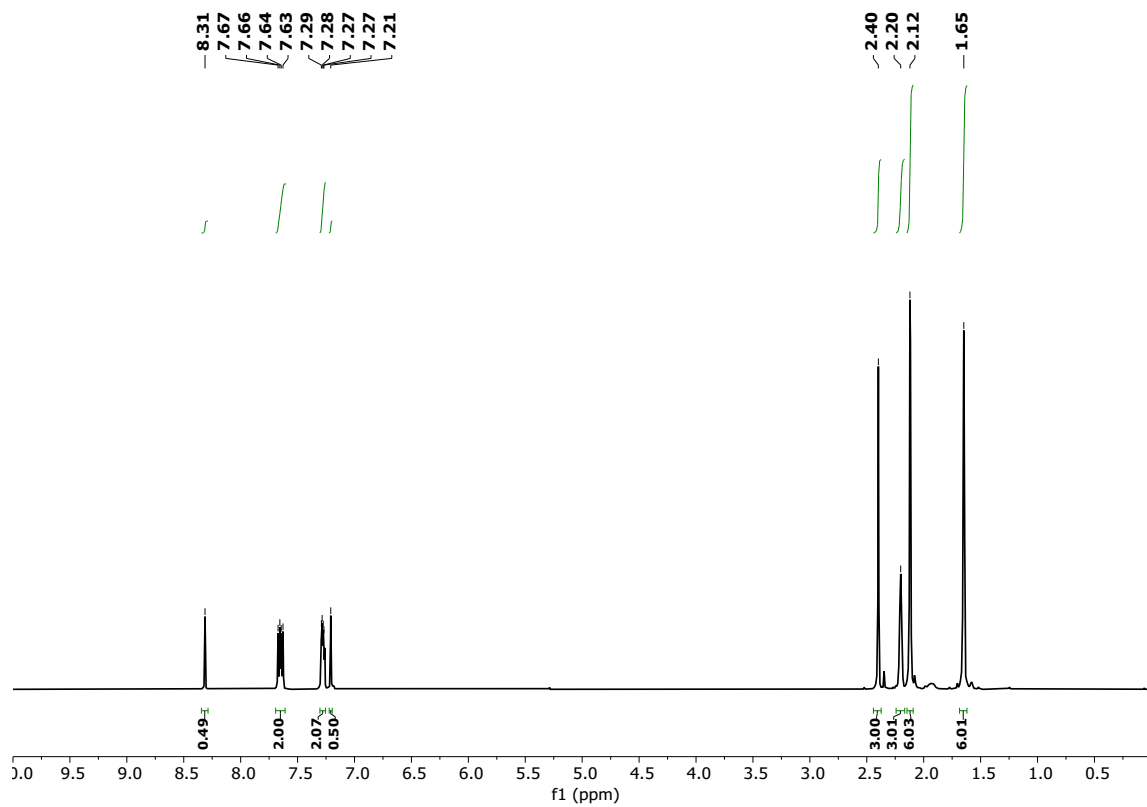

$^{13}\text{C}\{^1\text{H}\}$  NMR (125.8 MHz,  $\text{CDCl}_3$ )

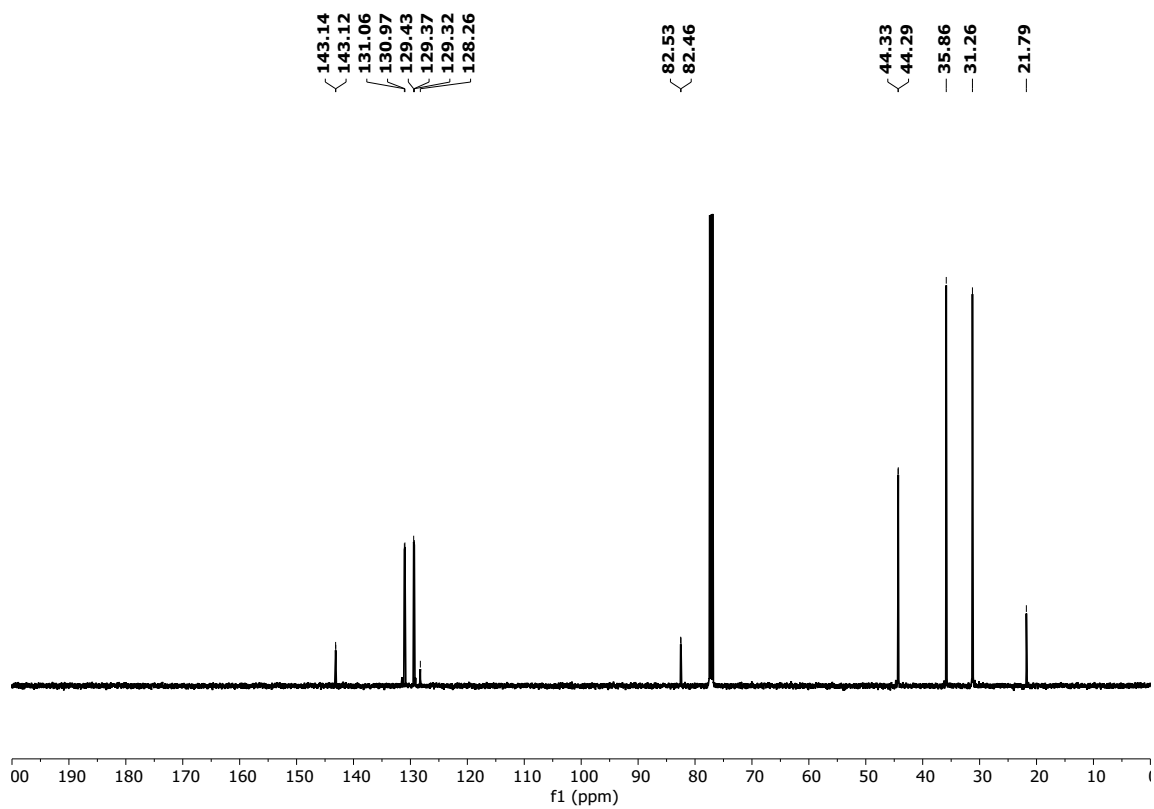

1-adamantyl (4-methoxyphenyl)-*H*-phosphinate (**1n**)

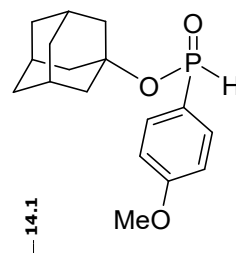

$^{31}\text{P}\{^1\text{H}\}$  NMR (202.5 MHz,  $\text{CDCl}_3$ )

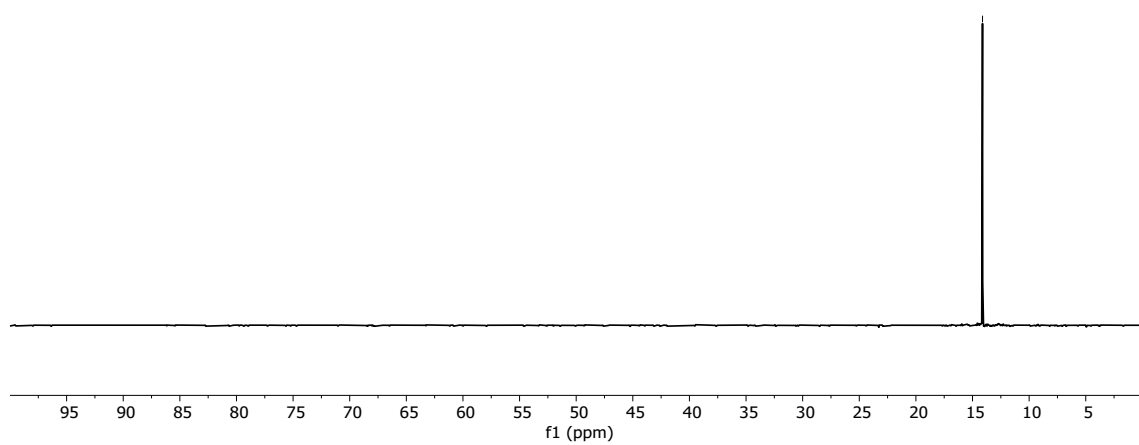

$^1\text{H}$  NMR (500 MHz,  $\text{CDCl}_3$ )

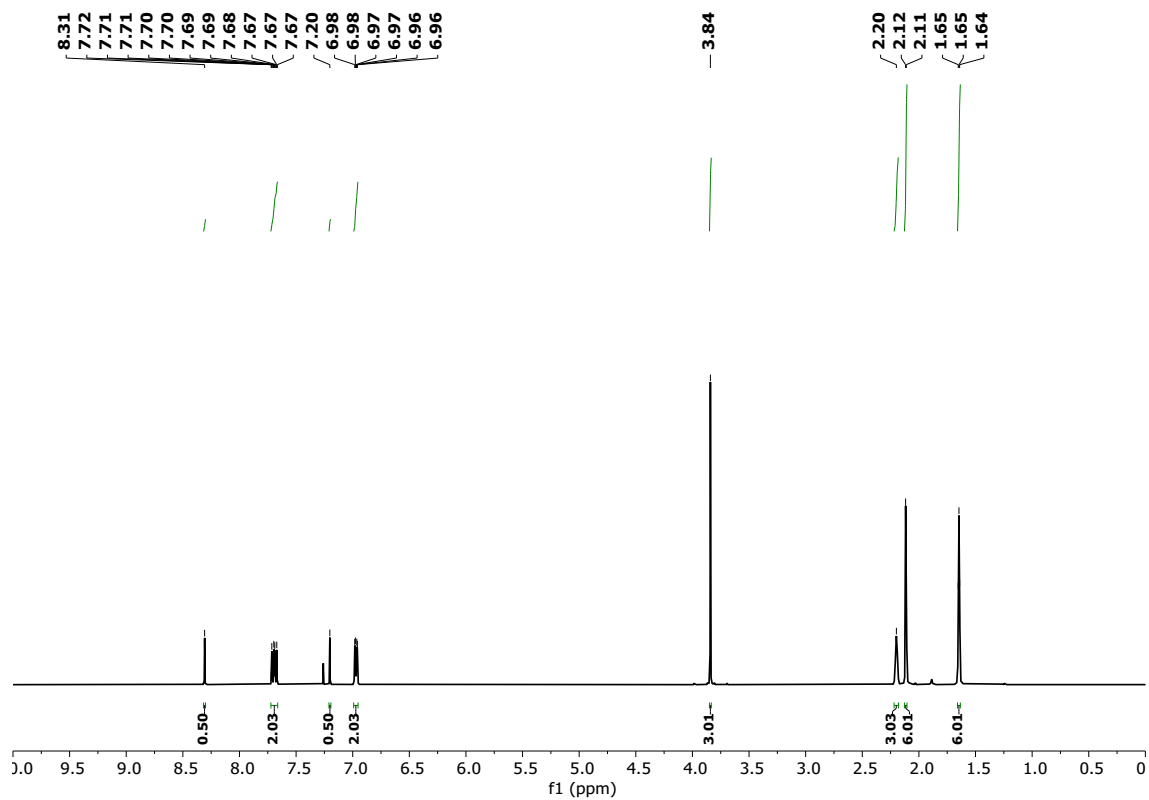



$^{13}\text{C}\{^1\text{H}\}$  NMR (125.8 MHz,  $\text{CDCl}_3$ )

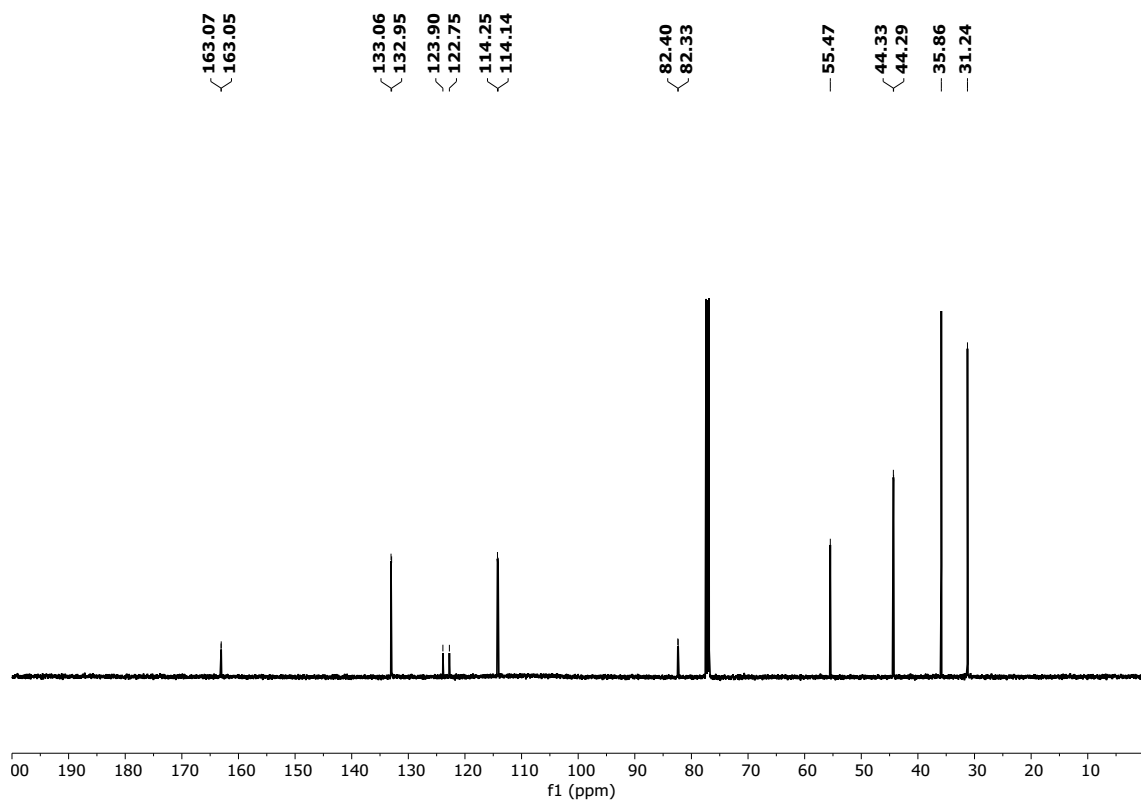

1-adamantyl (1-naphthyl)-*H*-phosphinate (**1o**)

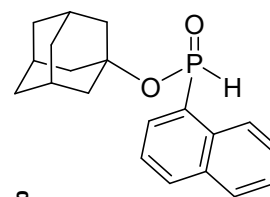

$^{31}\text{P}\{^1\text{H}\}$  NMR (202.5 MHz,  $\text{CDCl}_3$ )

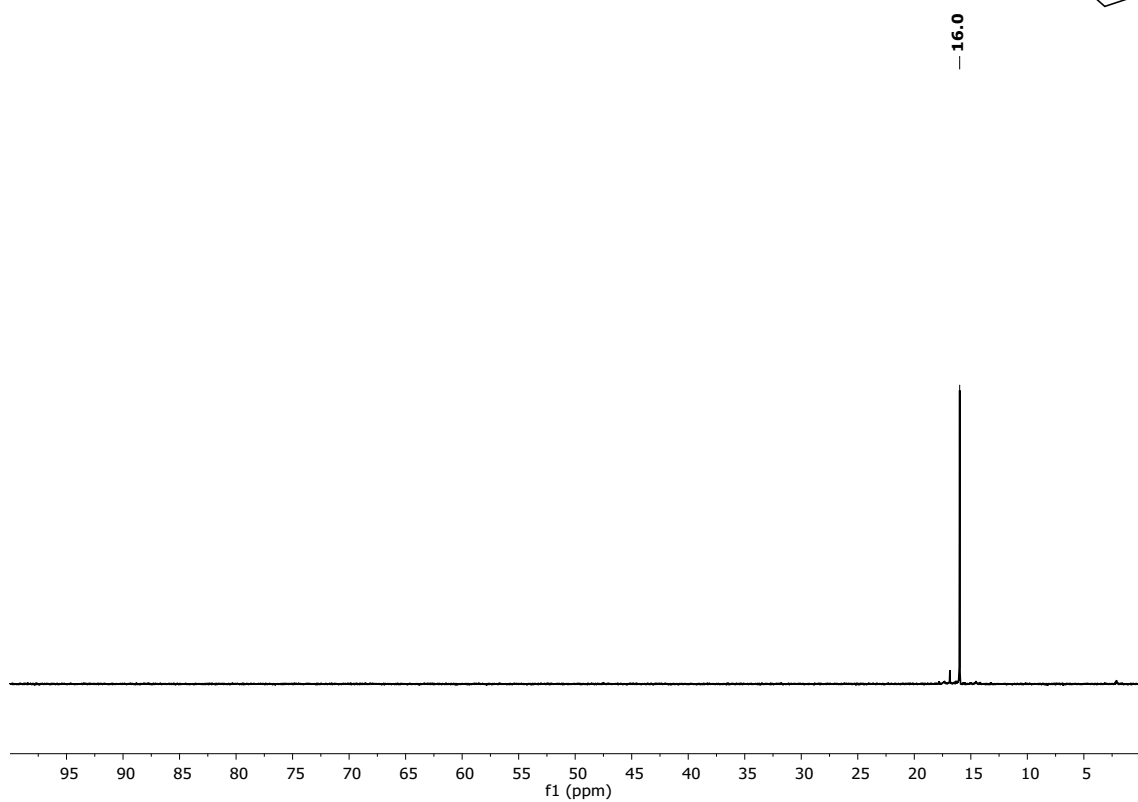

$^1\text{H}$  NMR (500 MHz,  $\text{CDCl}_3$ )

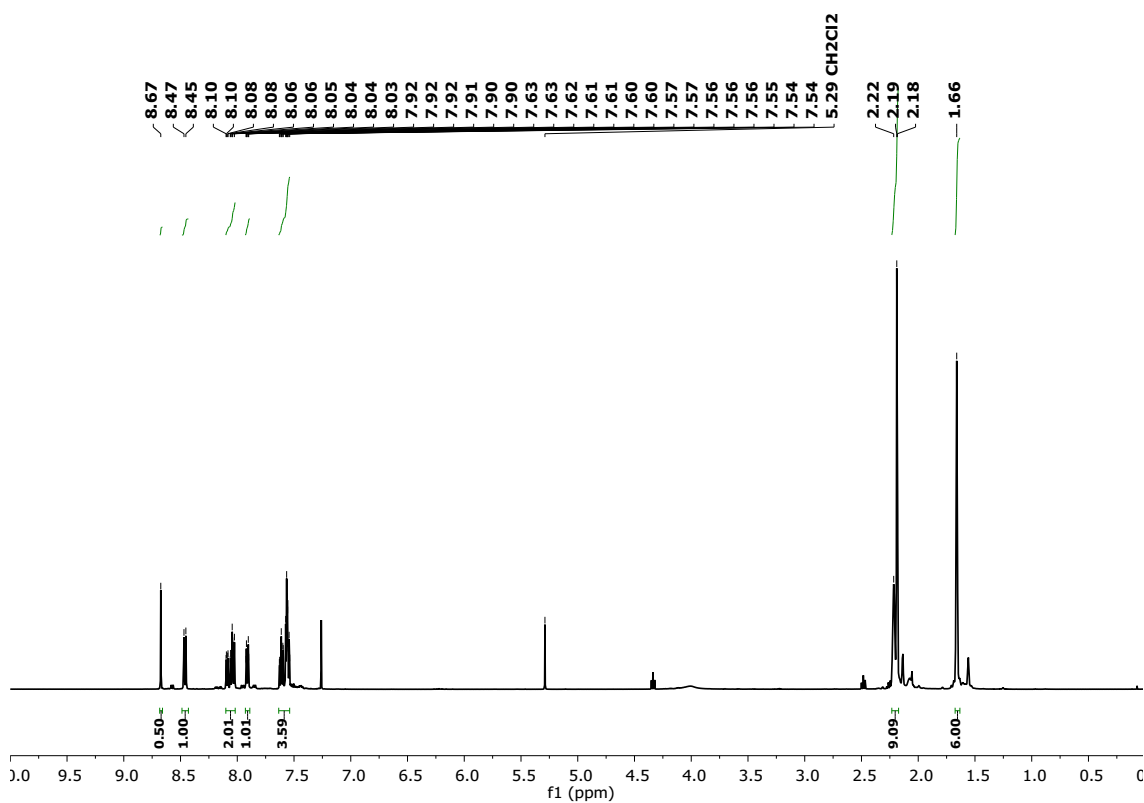

$^{13}\text{C}\{^1\text{H}\}$  NMR (125.8 MHz,  $\text{CDCl}_3$ )

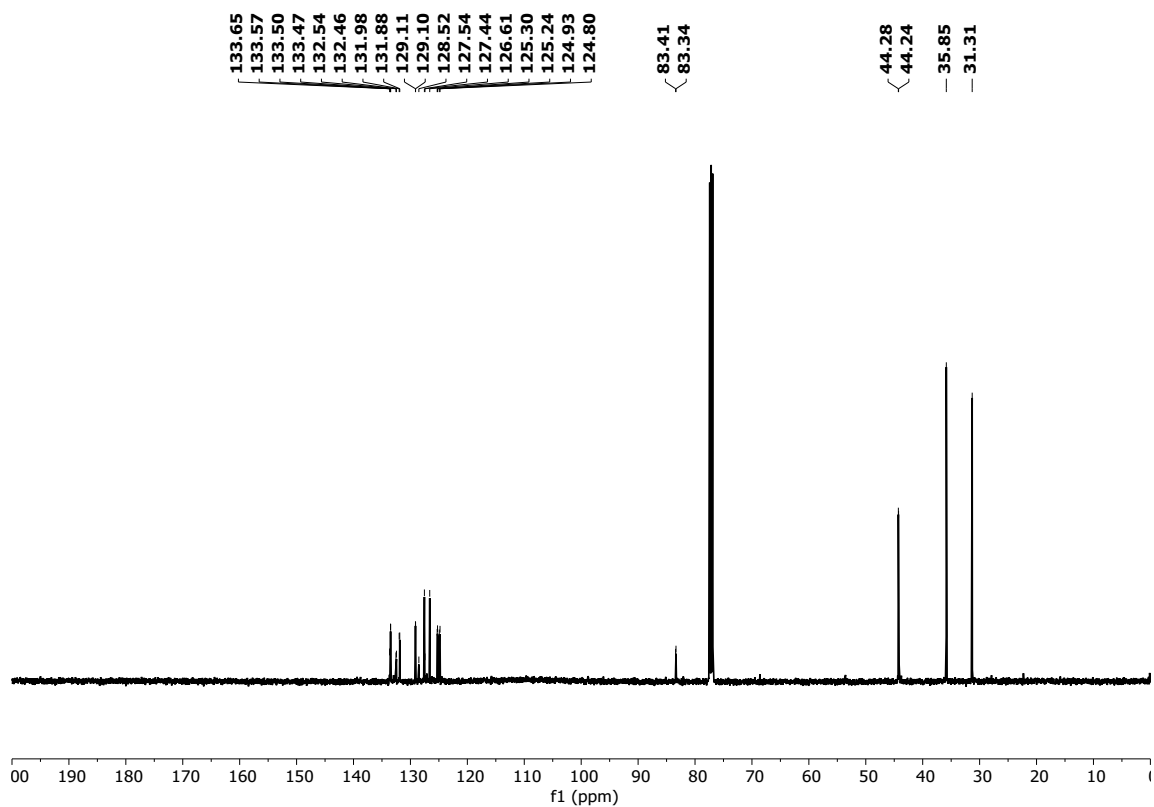

1-adamantyl *t*-butyl-*H*-phosphinate (**1p**)

$^{31}\text{P}\{^1\text{H}\}$  NMR (121.5 MHz,  $\text{CDCl}_3$ )

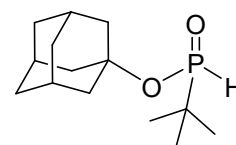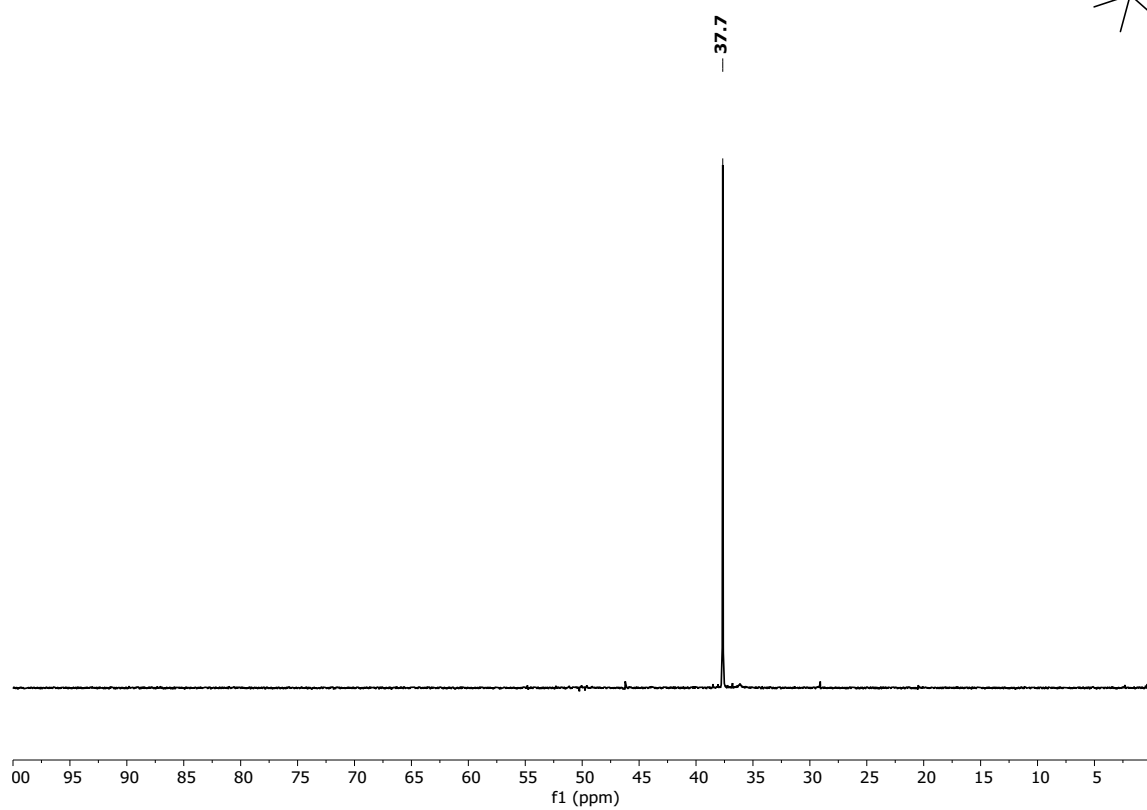

$^1\text{H}$  NMR (500 MHz,  $\text{CDCl}_3$ )

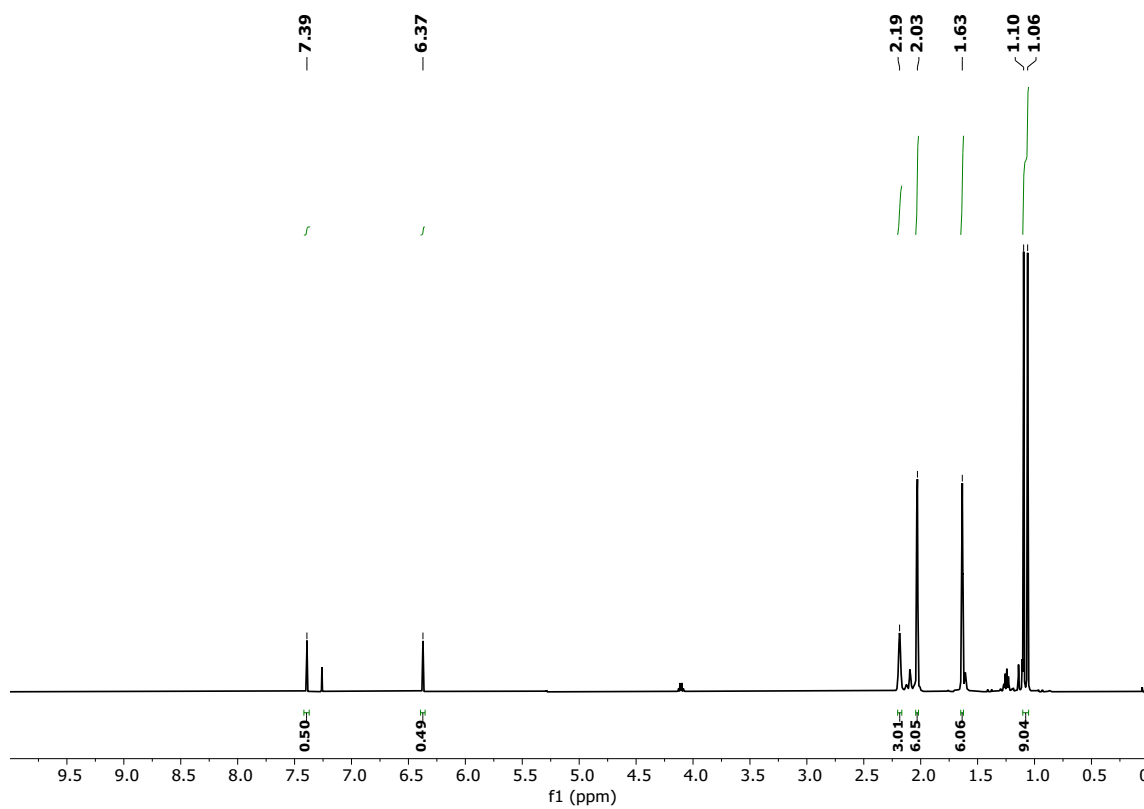

$^{13}\text{C}\{^1\text{H}\}$  NMR (75.5 MHz,  $\text{CDCl}_3$ )

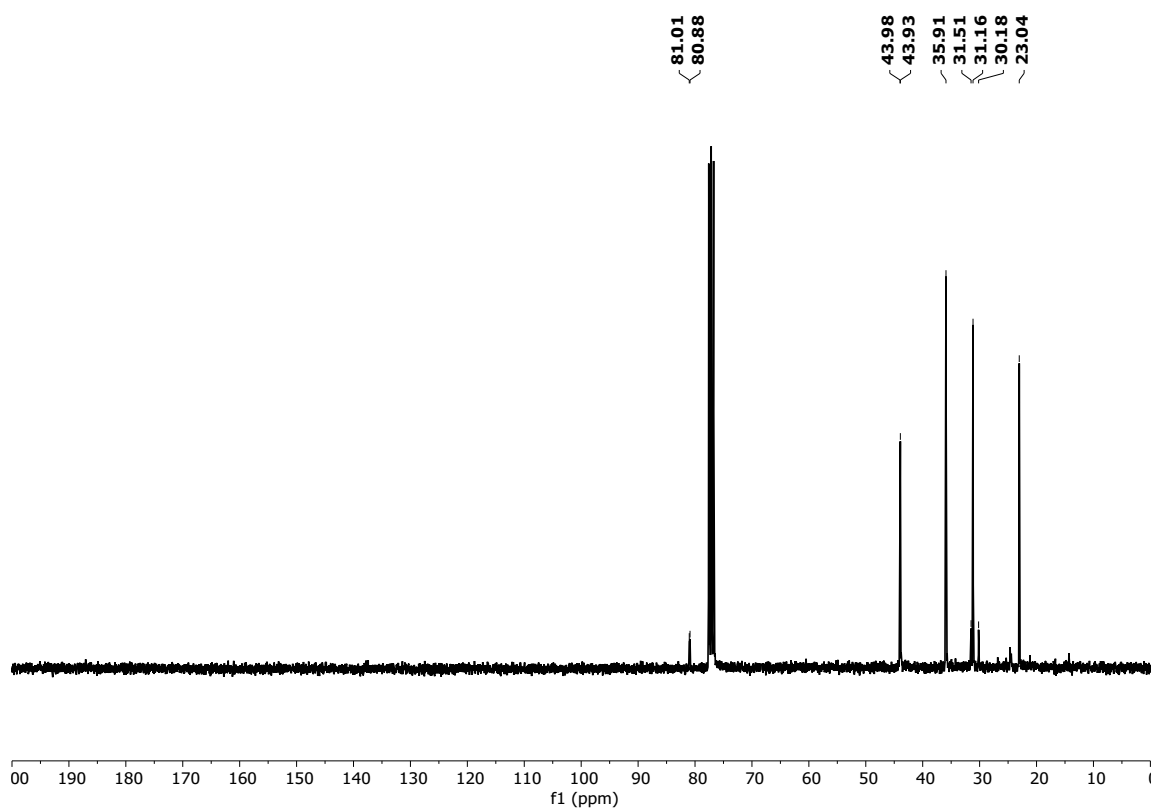

((2*R*,3*R*)-1,4-dioxaspiro[4.5]decane-2,3-diyl)bis(bis(4-(trifluoromethyl)phenyl)methanol)  
[(*R,R*-2*d*)]

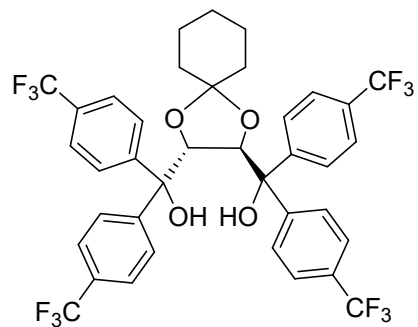

<sup>1</sup>H NMR (500 MHz, CDCl<sub>3</sub>)

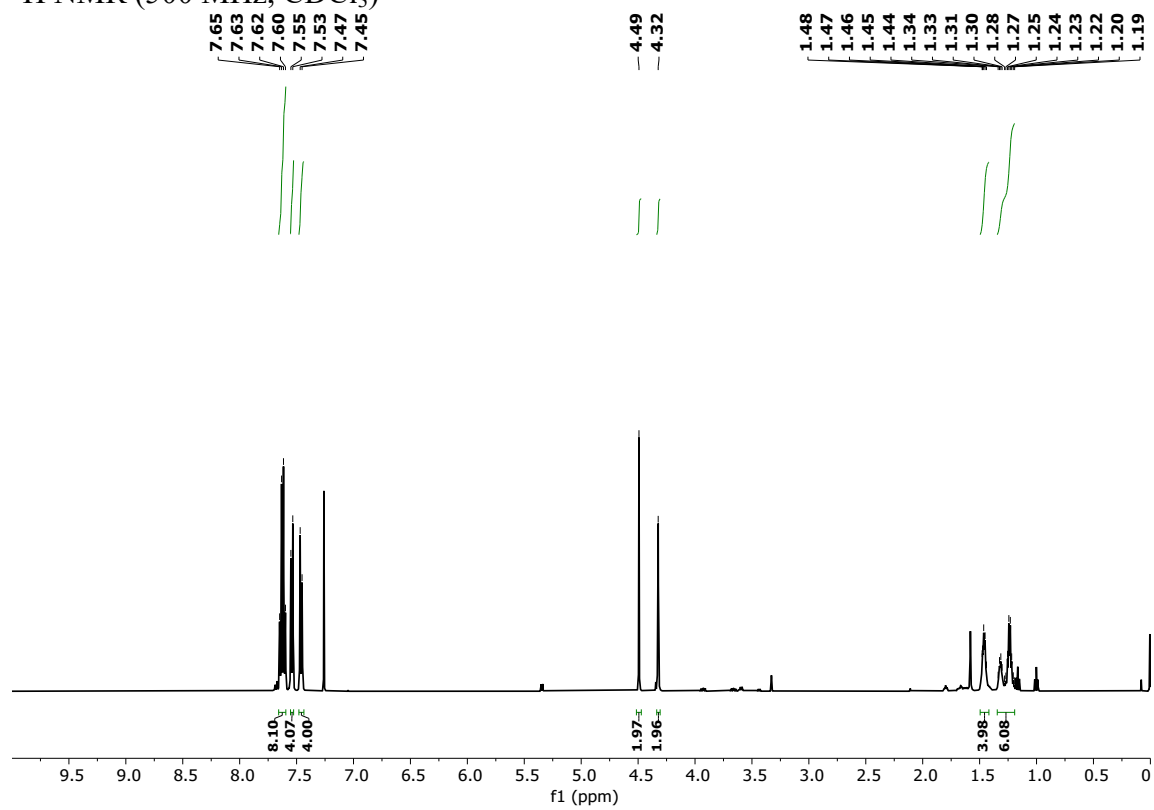

$^{13}\text{C}\{^1\text{H}\}$  NMR (125.8 MHz,  $\text{CDCl}_3$ )

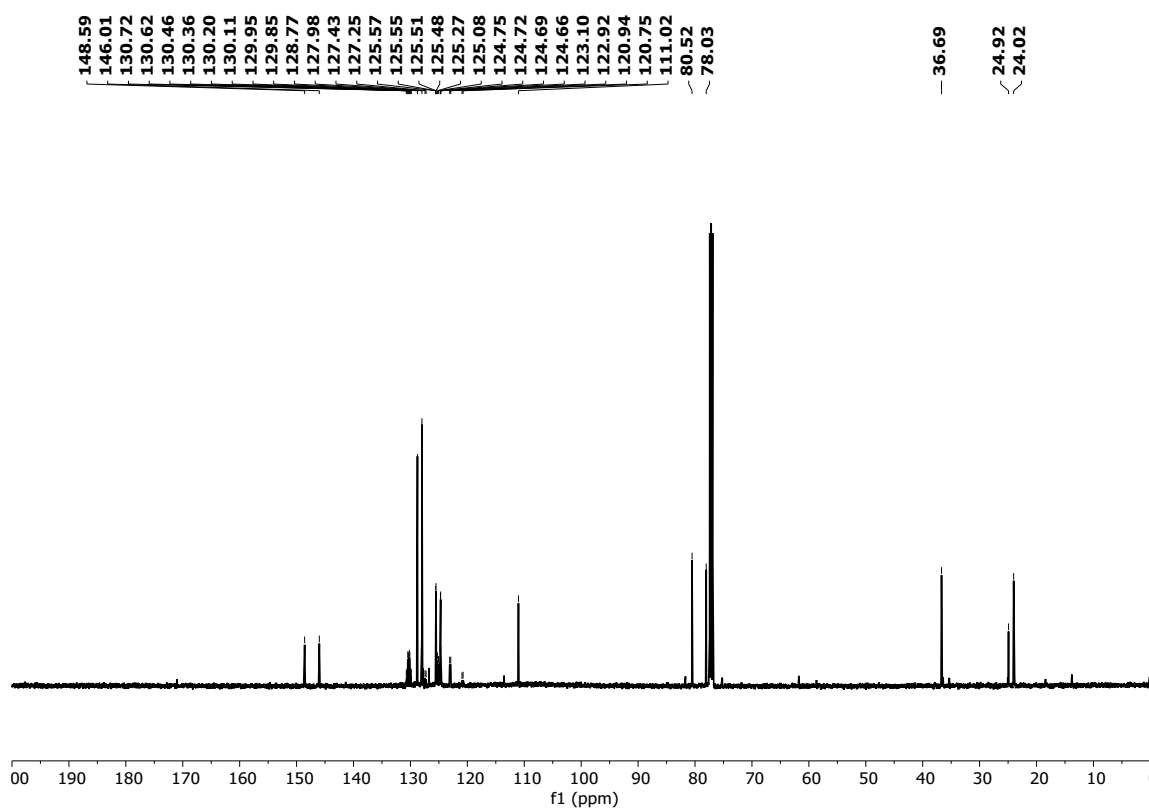

$^{19}\text{F}$  NMR (282 MHz,  $\text{CDCl}_3$ )

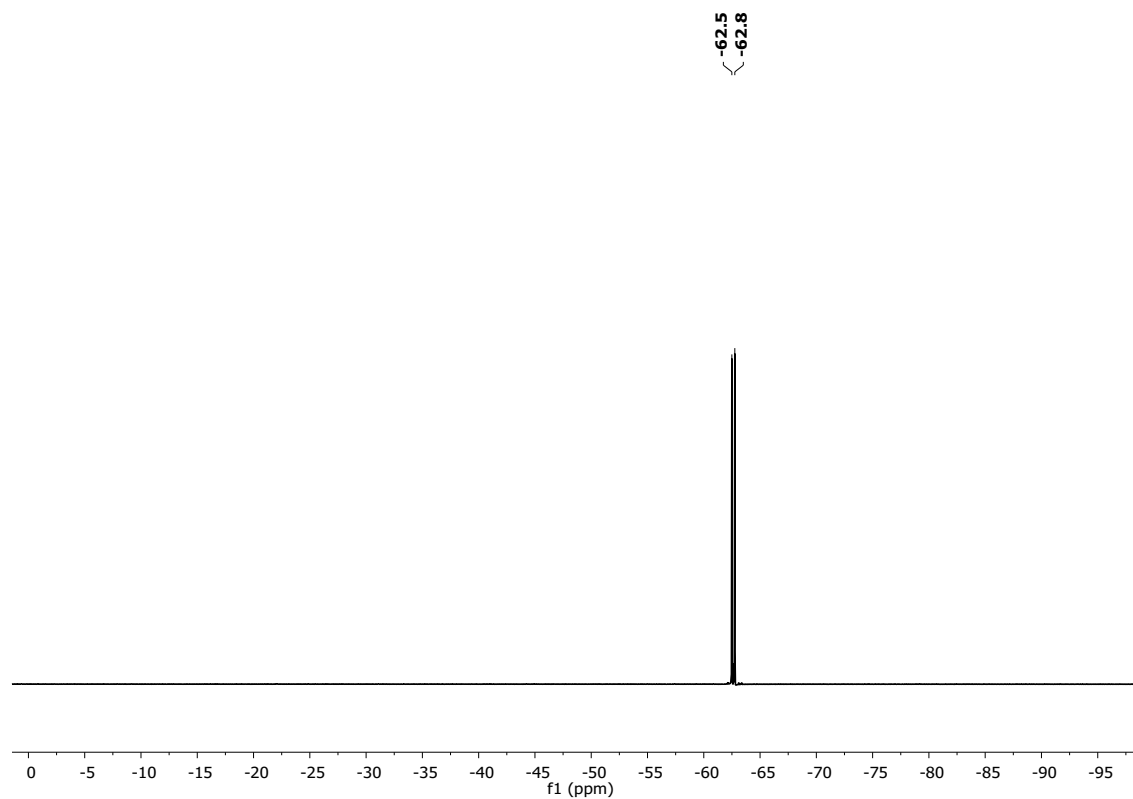

((2*R*,3*R*)-1,4-dioxaspiro[4.5]decane-2,3-diyl)bis(di(naphthalen-2-yl)methanol) [(*R,R*)-**2f**]

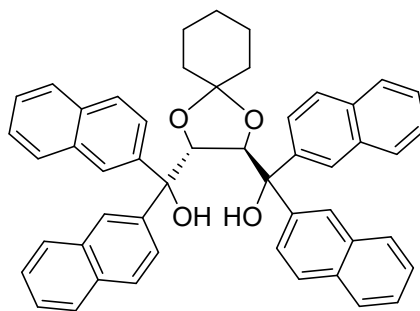

<sup>1</sup>H NMR (500 MHz, CDCl<sub>3</sub>)

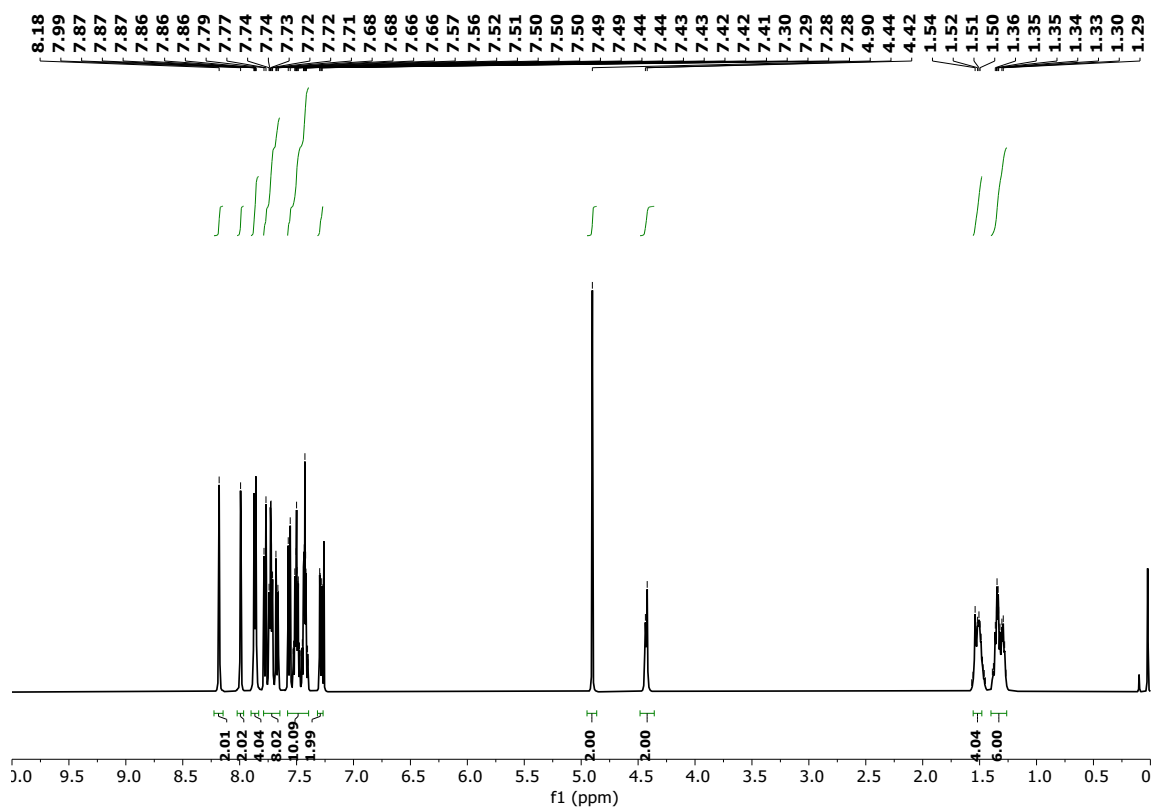



$^{13}\text{C}\{^1\text{H}\}$  NMR (125.8 MHz,  $\text{CDCl}_3$ )

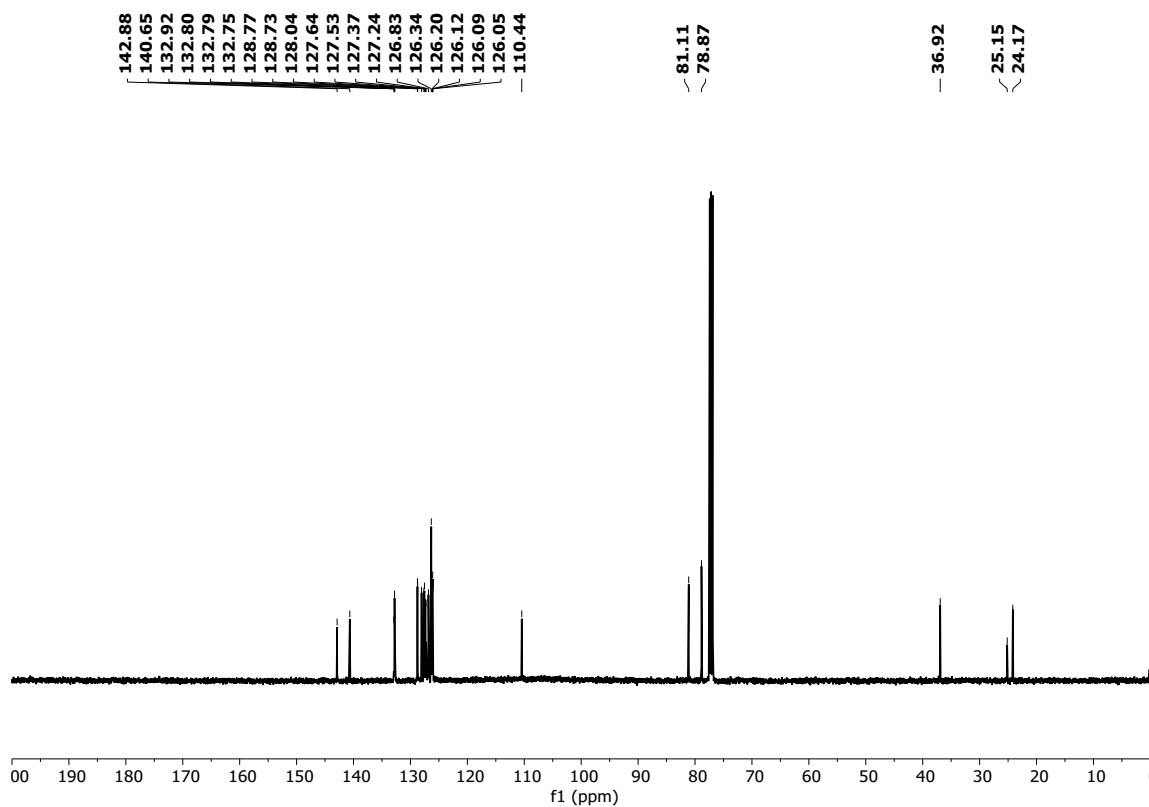

(*R*)-(2-methoxyphenyl)-phenylphosphine oxide [(*R*)-**3a**]

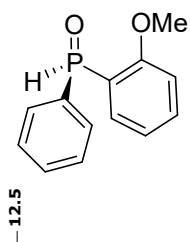

$^{31}\text{P}\{^1\text{H}\}$  NMR (121.5 MHz,  $\text{CDCl}_3$ )

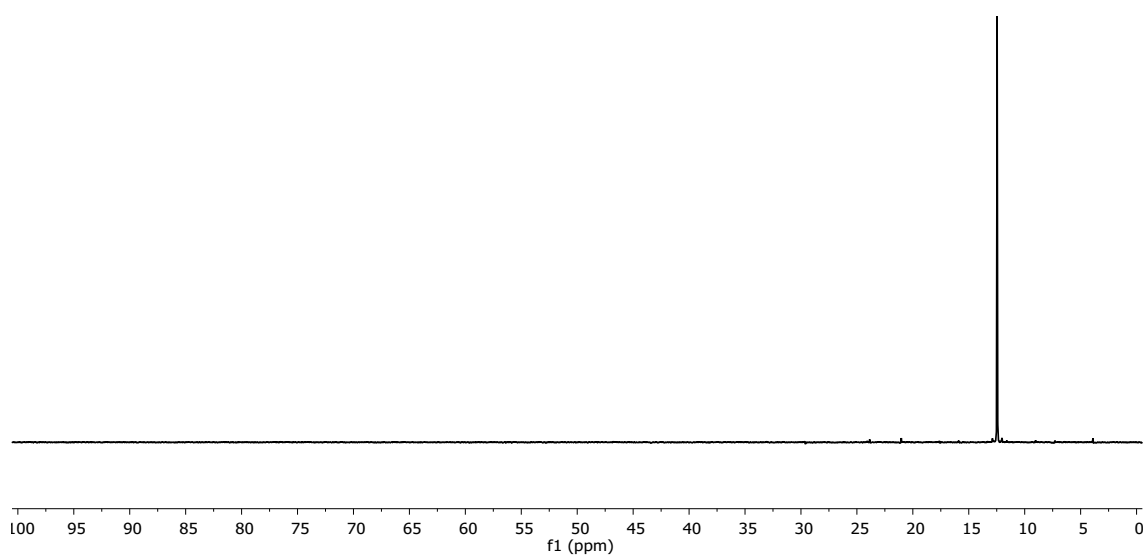

$^1\text{H}$  NMR (500 MHz,  $\text{CDCl}_3$ )

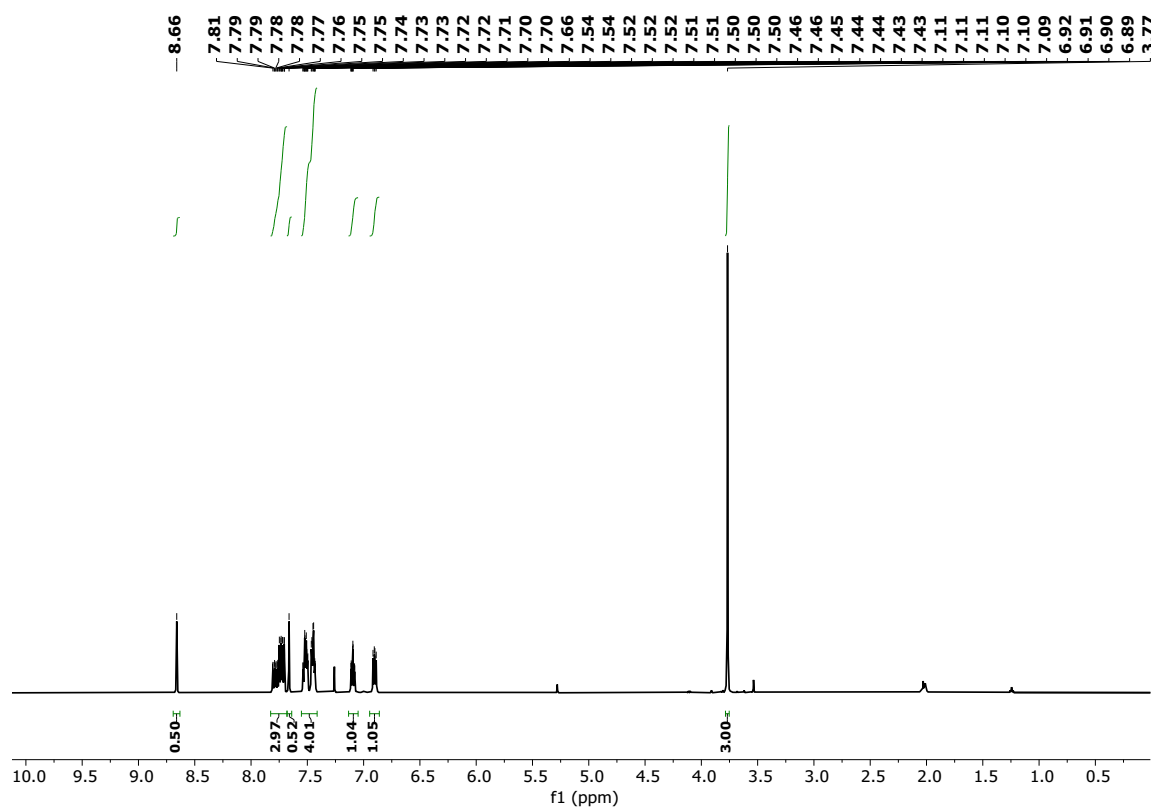

$^{13}\text{C}\{^1\text{H}\}$  NMR (75.5 MHz,  $\text{CDCl}_3$ )

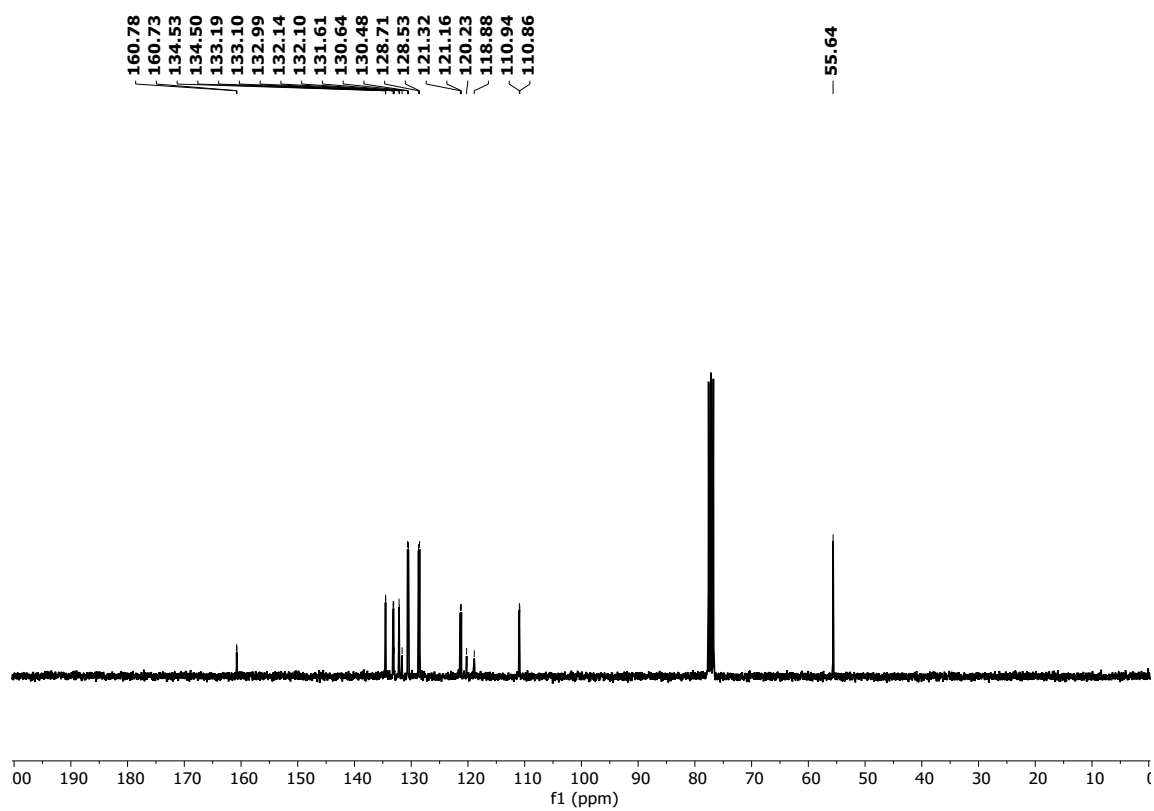

(*R*)-(2-methoxyphenyl)-methyl-phenylphosphine oxide [(*R*)-**3b**]

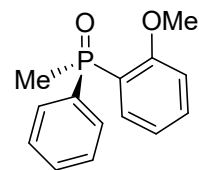

$^{31}\text{P}\{^1\text{H}\}$  NMR (121.5 MHz,  $\text{CDCl}_3$ )

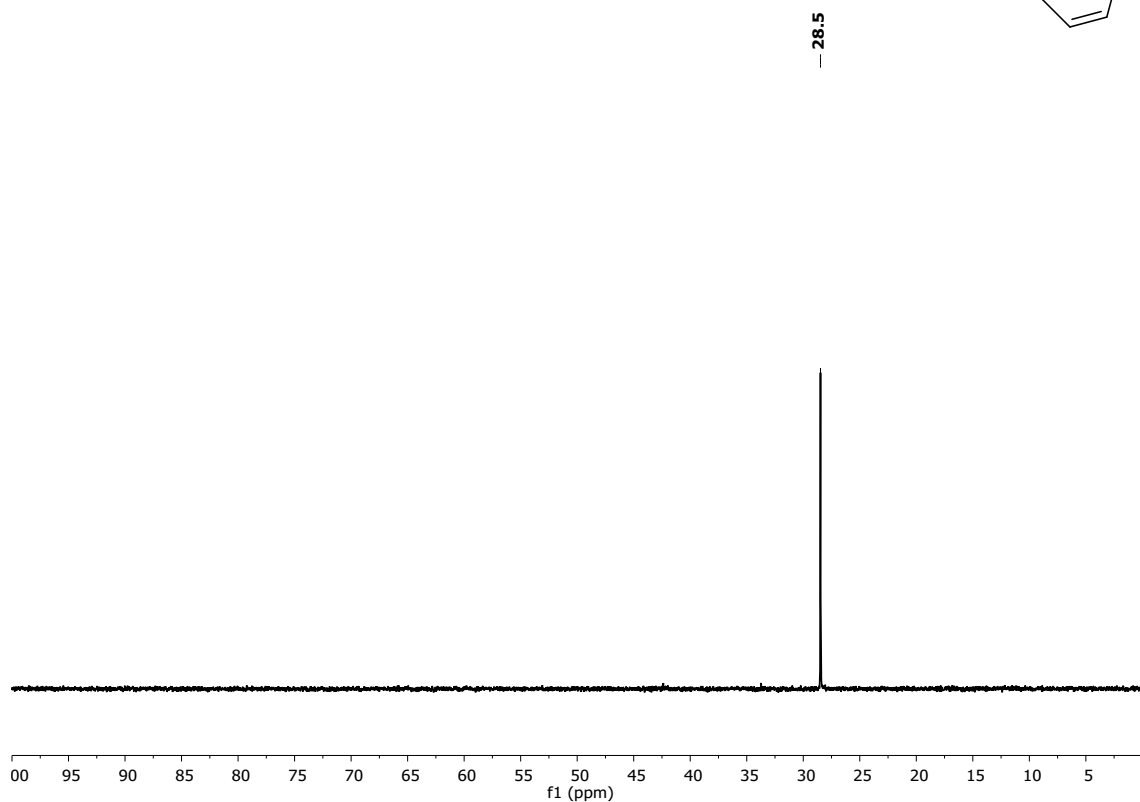

$^1\text{H}$  NMR (500 MHz,  $\text{CDCl}_3$ )

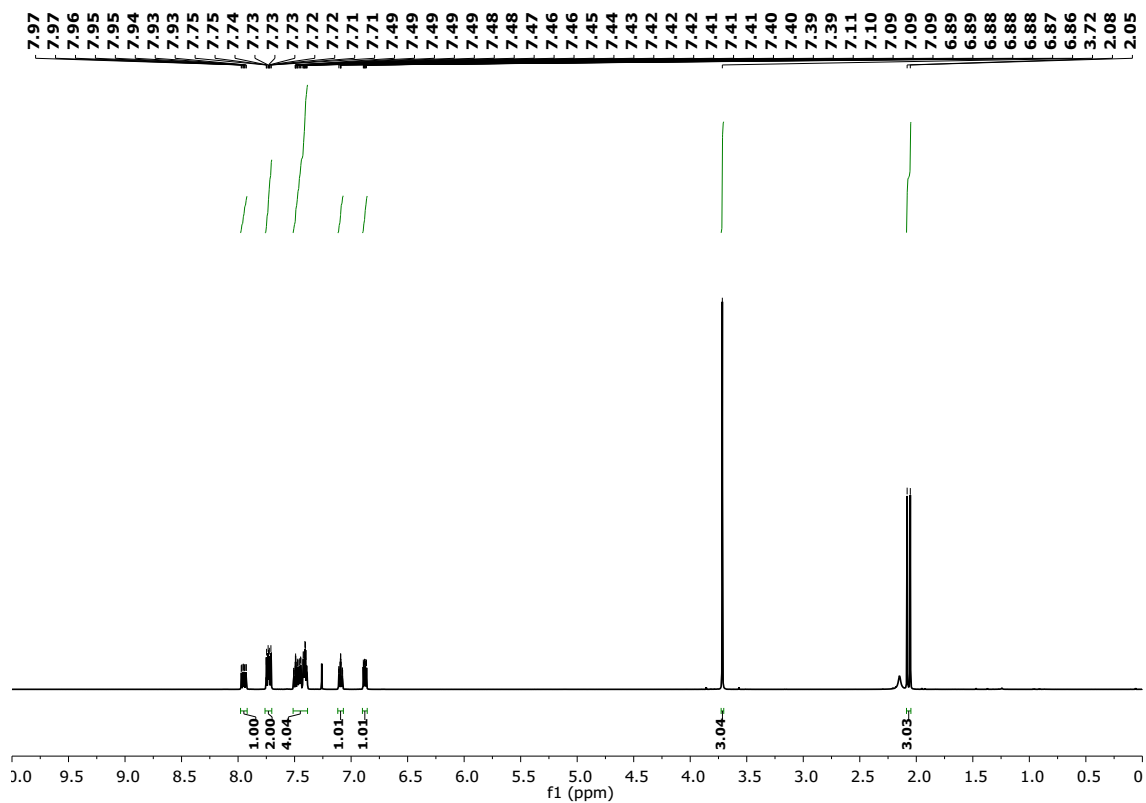

$^{13}\text{C}\{^1\text{H}\}$  NMR (125.8 MHz,  $\text{CDCl}_3$ )

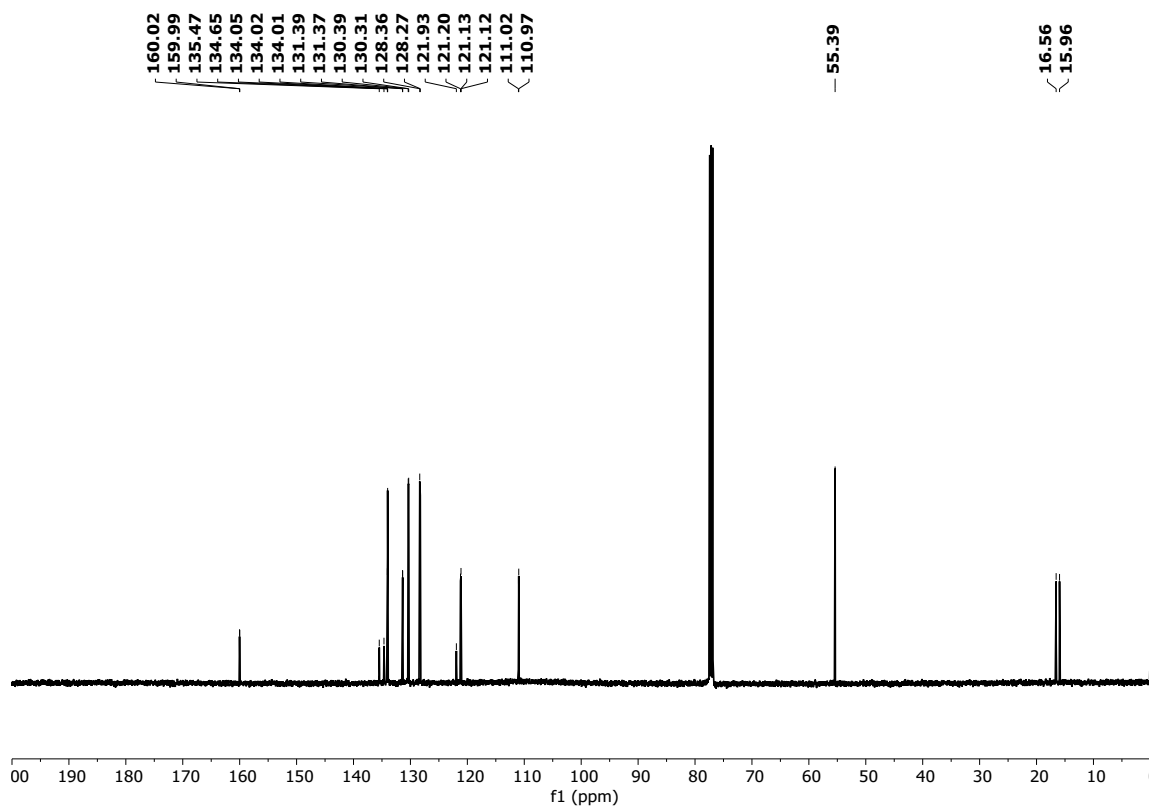

(*R*)-cyclohexyl-(2-methoxyphenyl)-methylphosphine oxide [(*R*)-**3c**]

$^{31}\text{P}\{^1\text{H}\}$  NMR (121.5 MHz,  $\text{CDCl}_3$ )

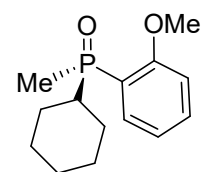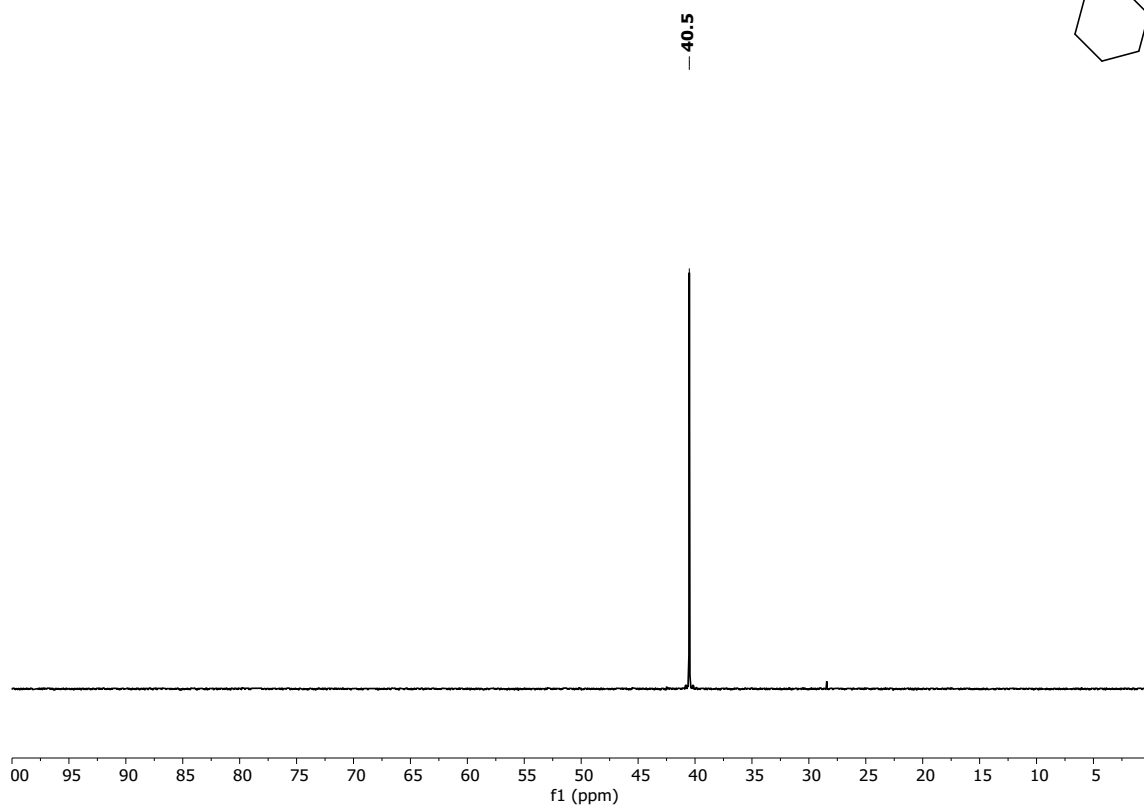

$^1\text{H}$  NMR (500 MHz,  $\text{CDCl}_3$ )

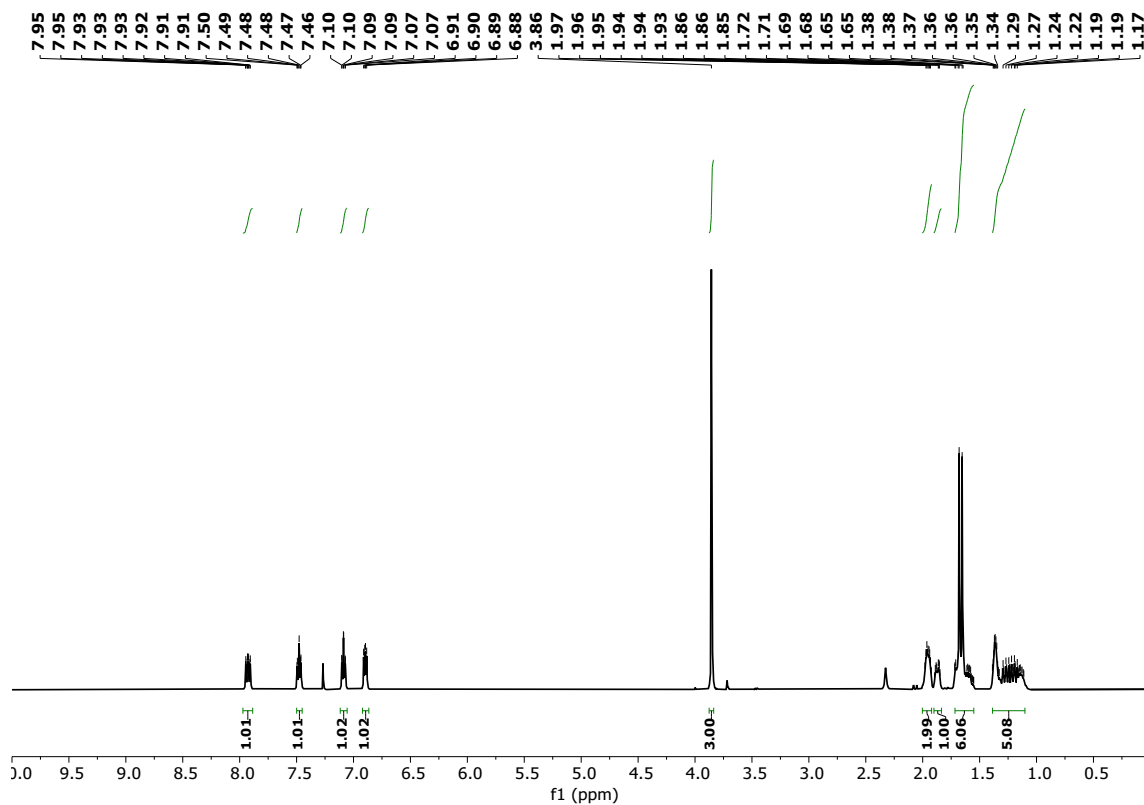

$^{13}\text{C}\{^1\text{H}\}$  NMR (75.5 MHz,  $\text{CDCl}_3$ )

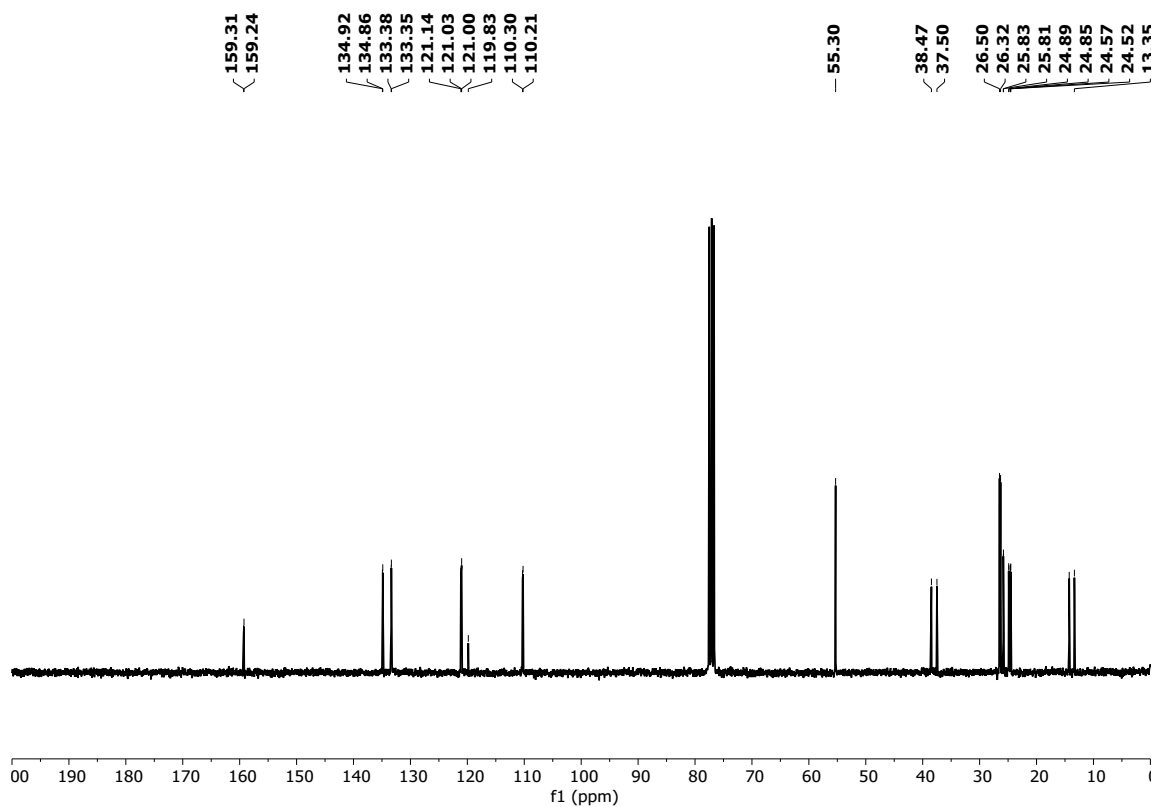

(*R*)-1-adamanty]phenylphosphonamidate [(*R*)-**3d**]

$^{31}\text{P}\{^1\text{H}\}$  NMR (202.5 MHz,  $\text{CDCl}_3$ )

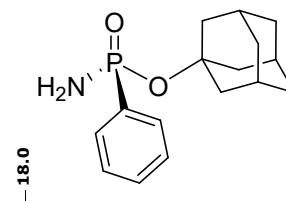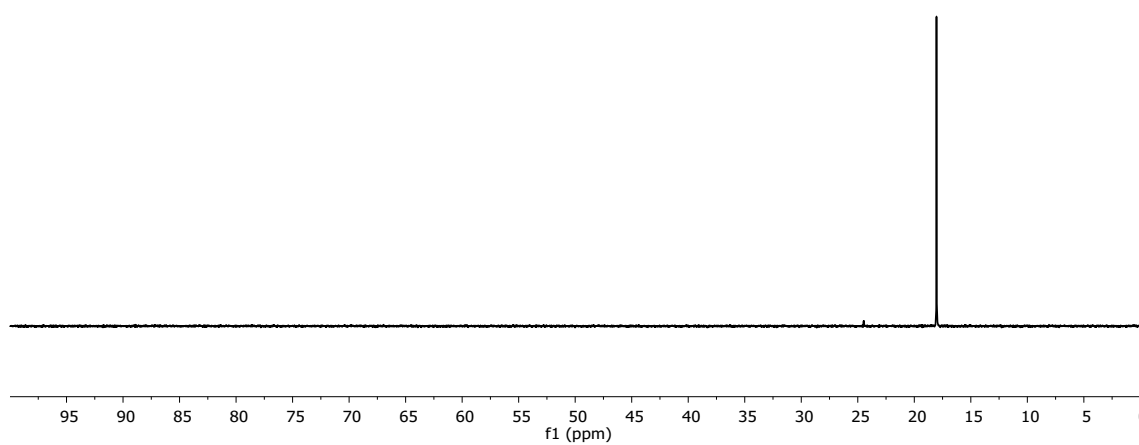

$^1\text{H}$  NMR (500 MHz,  $\text{CDCl}_3$ )

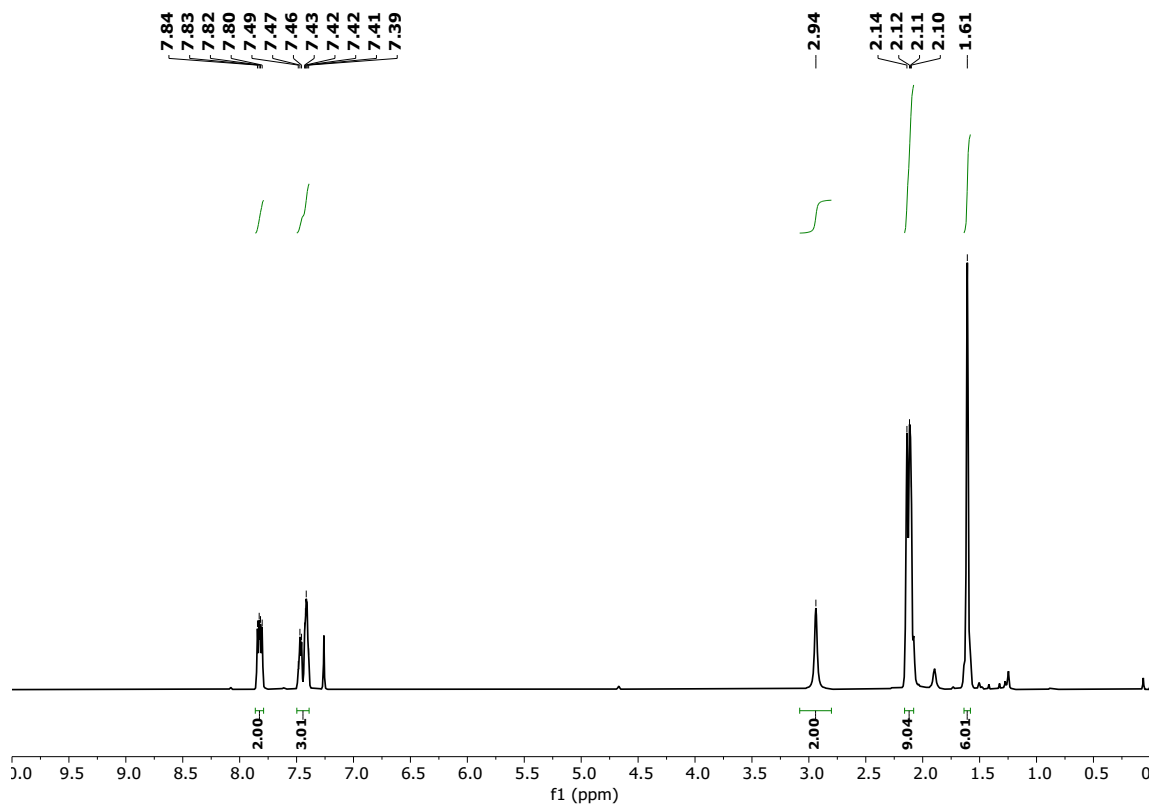



$^{13}\text{C}\{^1\text{H}\}$  NMR (125.8 MHz,  $\text{CDCl}_3$ )

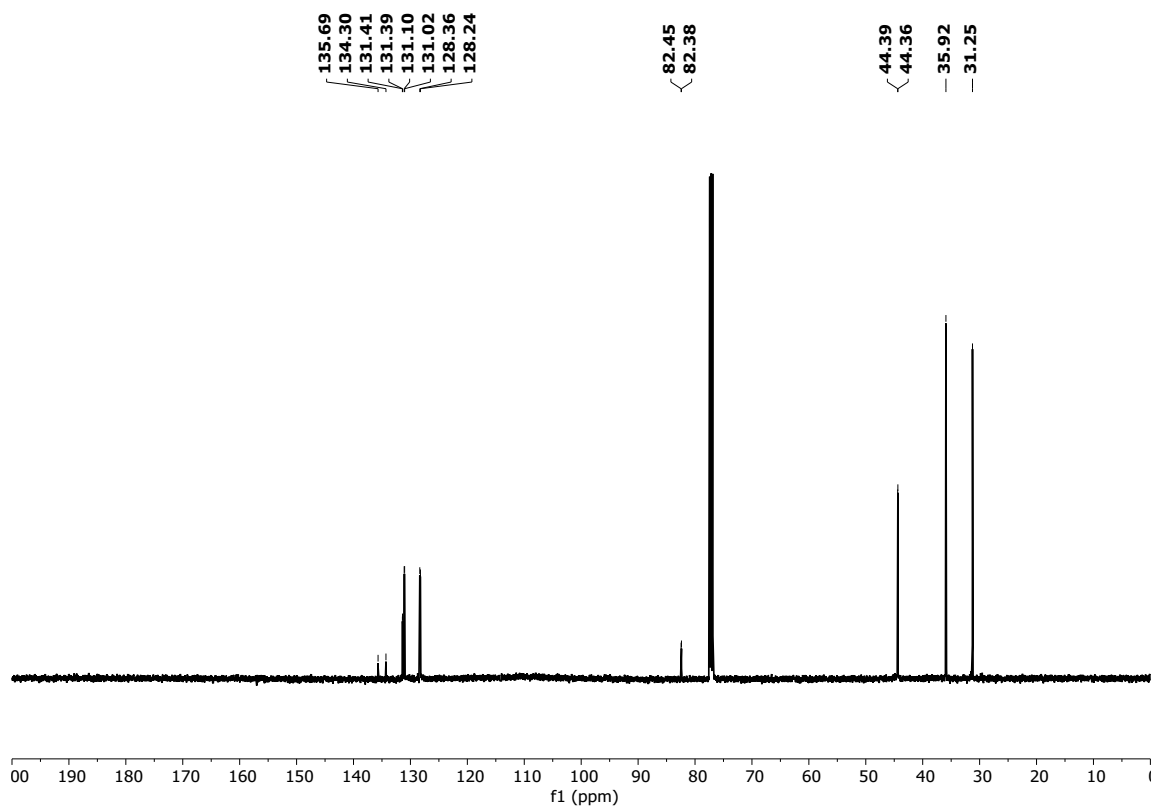

(*R*)-*N*-(1-adamantyl-phenylphosphonyl)-2,4,6-triisopropylbenzenesulfonamide [(*R*)-**3e**]

$^{31}\text{P}\{^1\text{H}\}$  NMR (202.5 MHz,  $\text{CDCl}_3$ )

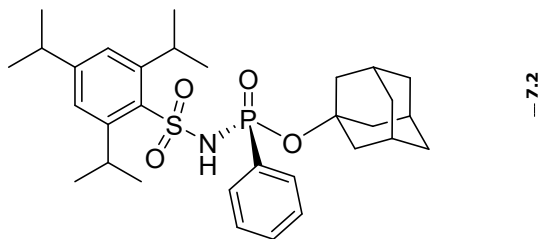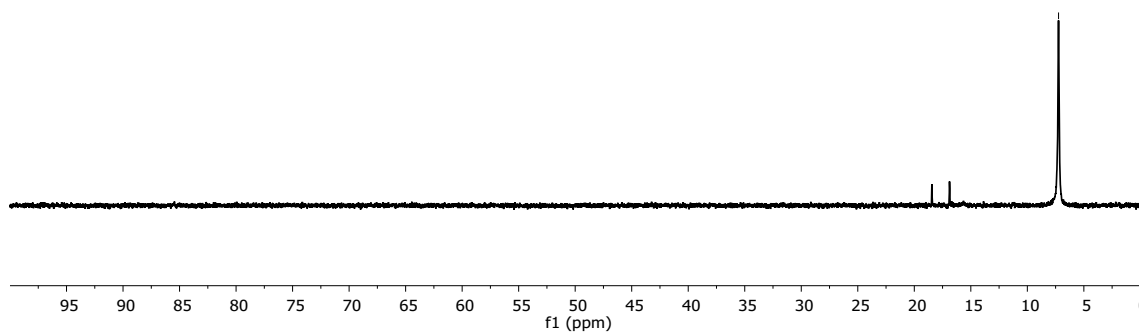

$^1\text{H}$  NMR (500 MHz,  $\text{CDCl}_3$ )

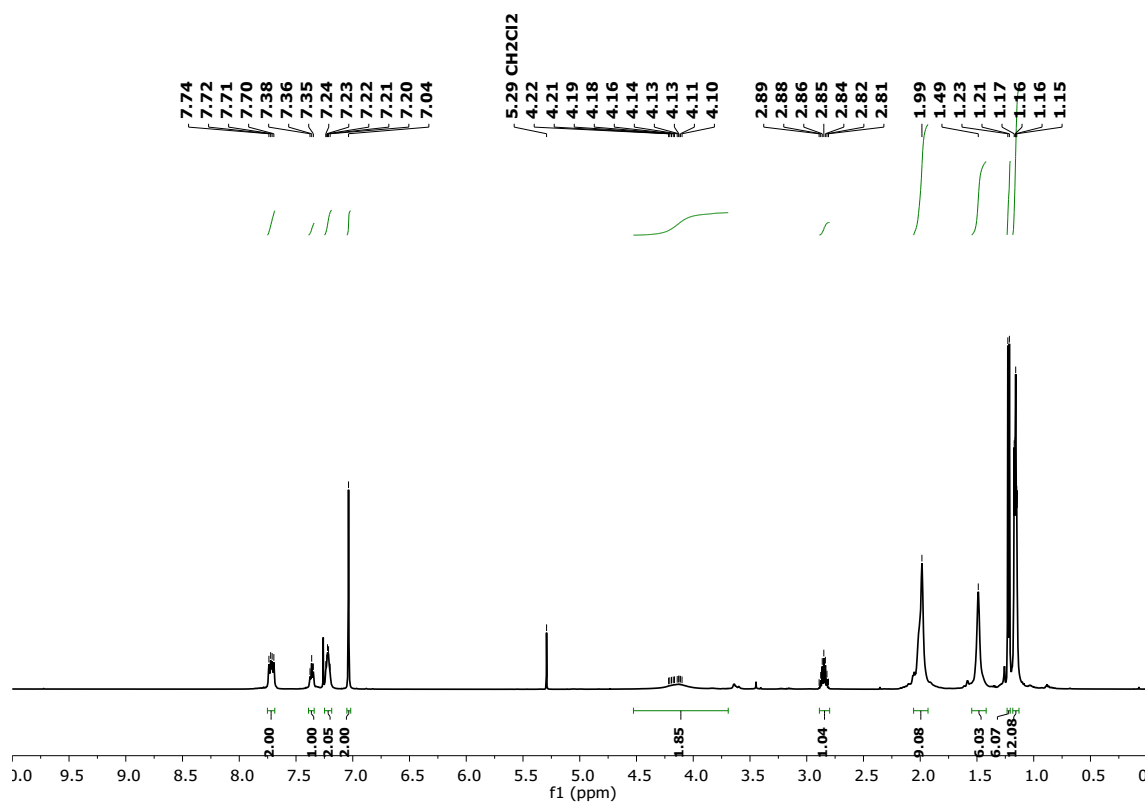

$^{13}\text{C}\{^1\text{H}\}$  NMR (125.8 MHz,  $\text{CDCl}_3$ )

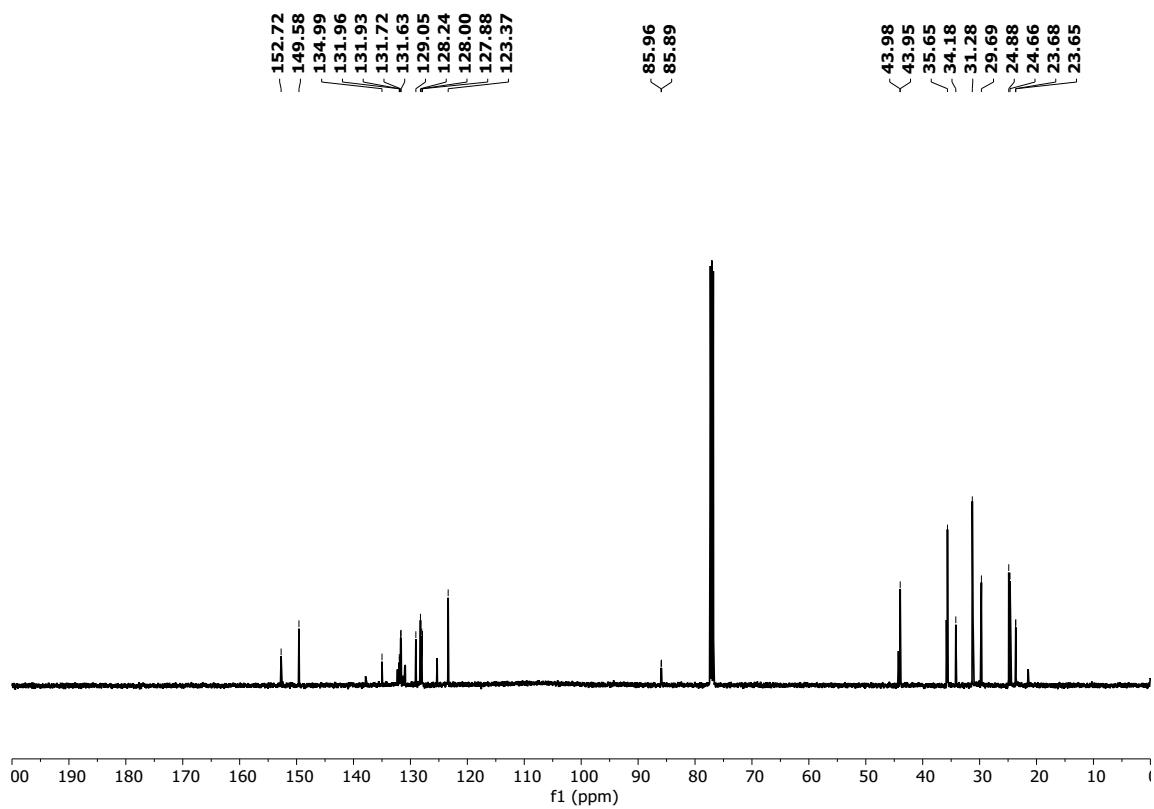

(S)-1-adamantyl-phenylphosphonothioic acid [(S)-3f]

$^{31}\text{P}\{^1\text{H}\}$  NMR (121.5 MHz,  $\text{CDCl}_3$ )

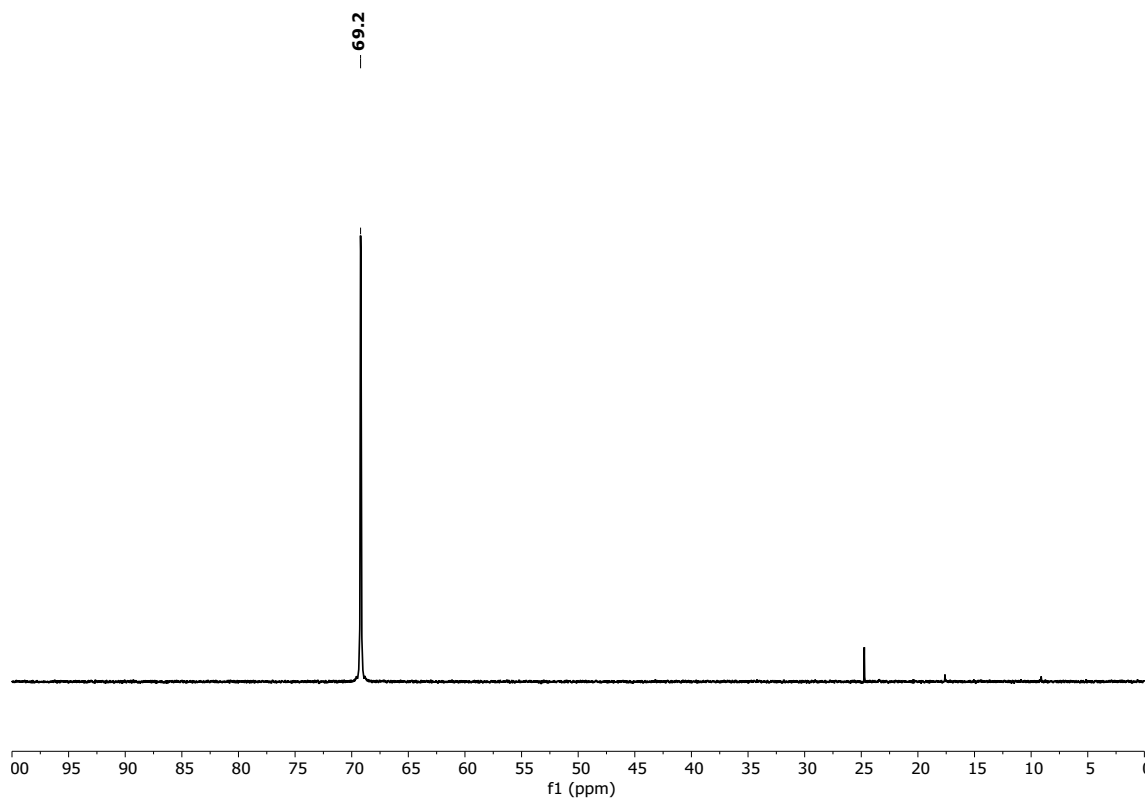

$^1\text{H}$  NMR (500 MHz,  $\text{CDCl}_3$ )

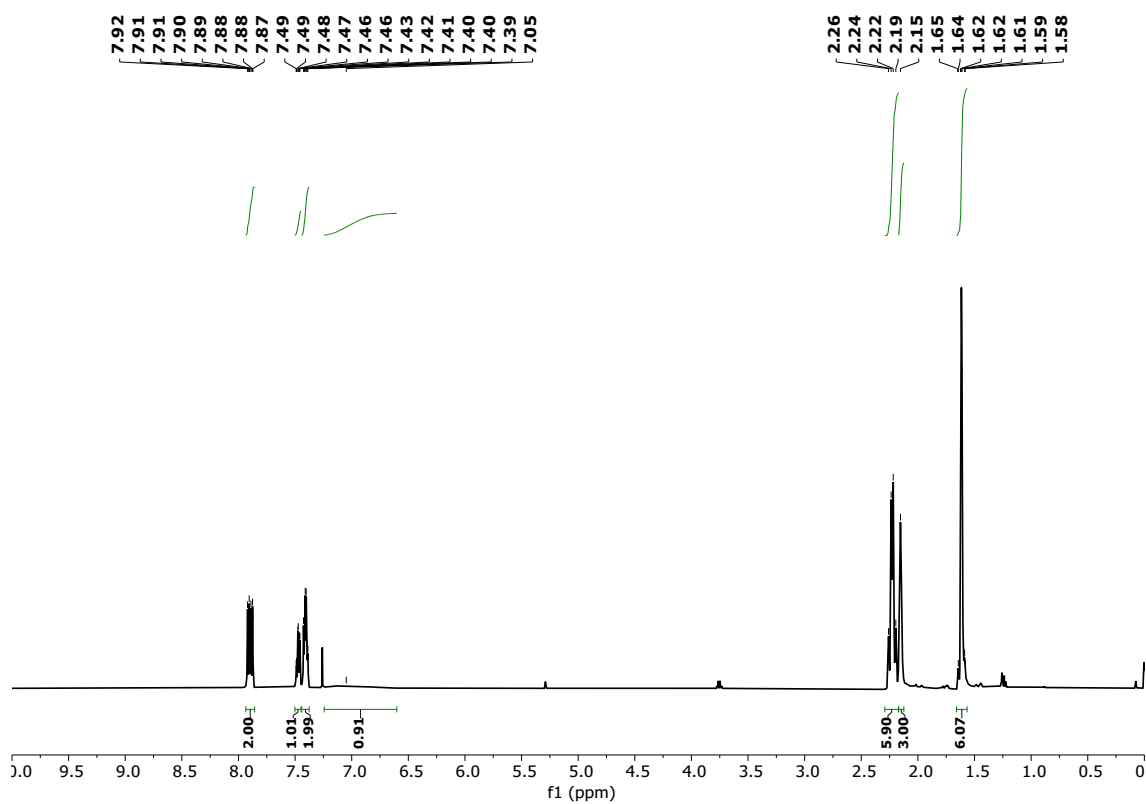

$^{13}\text{C}\{^1\text{H}\}$  NMR (125.8 MHz,  $\text{CDCl}_3$ )

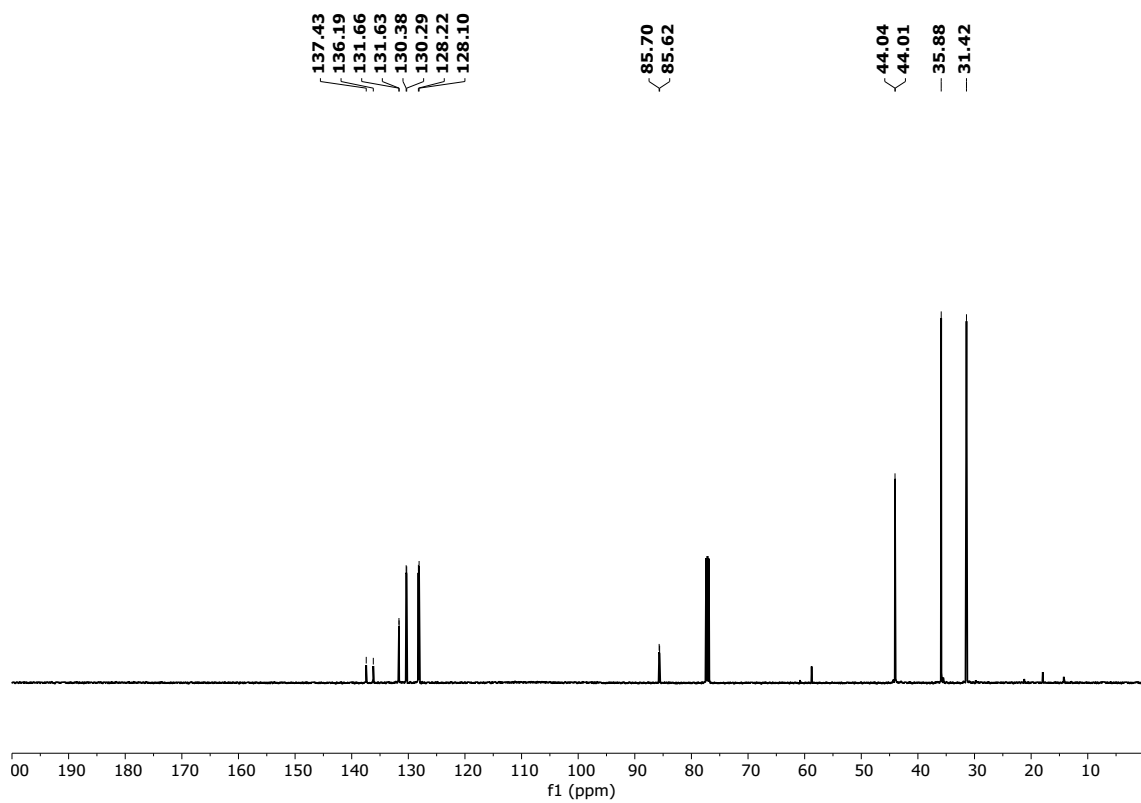

(S)-3f + rac. 8

<sup>1</sup>H NMR (500 MHz, CDCl<sub>3</sub>)

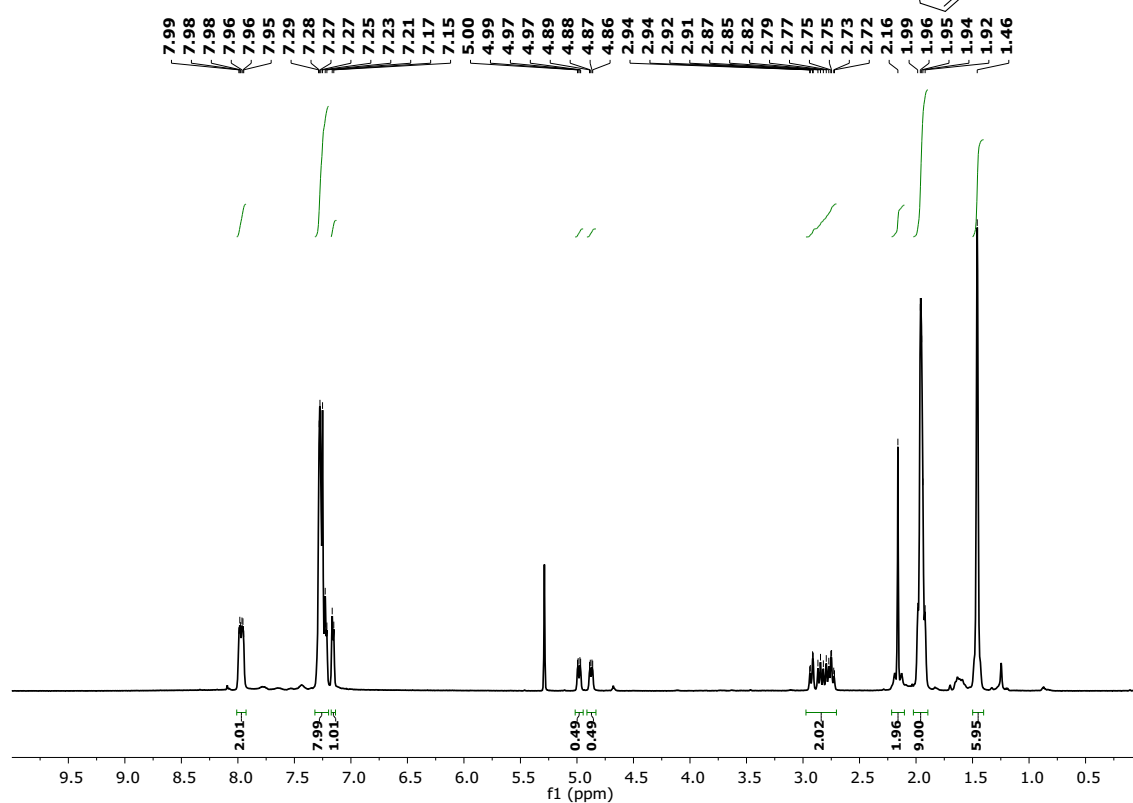

(S)-3f + rac. 11

<sup>1</sup>H NMR (500 MHz, CDCl<sub>3</sub>)

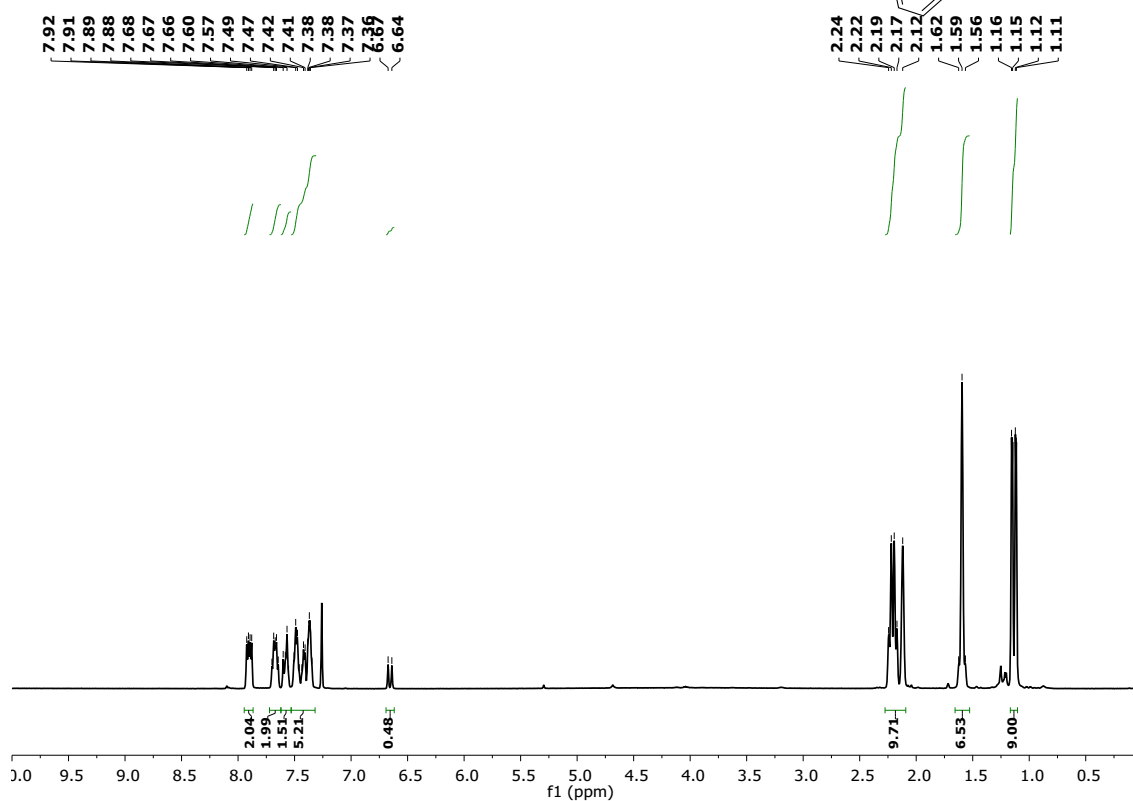

## **HPLC traces of the optically active compounds**

**Table S12** HPLC parameters for the *ee* determination of **1a-o** and **3a-d**.

| Compound  | Column                   | Hexane :<br>Ethanol<br>ratio | Retention<br>time 1<br>(min) | Enantiomer<br>1          | Retention<br>time 2<br>(min) | Enantiomer<br>2          |
|-----------|--------------------------|------------------------------|------------------------------|--------------------------|------------------------------|--------------------------|
| <b>1a</b> | Amylose-2 <sup>a</sup>   | 50:50                        | 7.6                          | ( <i>S</i> ), (-)        | 13.8                         | ( <i>R</i> ), (+)        |
| <b>1b</b> | Amylose-2 <sup>a</sup>   | 50:50                        | 7.5                          | ( <i>S</i> ), (-)        | 14.1                         | ( <i>R</i> ), (+)        |
| <b>1c</b> | Amylose-2 <sup>a</sup>   | 50:50                        | 7.6                          | ( <i>R</i> ), (+)        | 9.0                          | ( <i>S</i> ), (-)        |
| <b>1d</b> | Amylose-2 <sup>a</sup>   | 50:50                        | 7.6                          | ( <i>R</i> ), (+)        | 9.8                          | ( <i>S</i> ), (-)        |
| <b>1e</b> | Amylose-2 <sup>a</sup>   | 85:15                        | 7.5                          | ( <i>S<sub>P</sub></i> ) | 10.1                         | ( <i>R<sub>P</sub></i> ) |
| <b>1f</b> | Cellulose-4 <sup>b</sup> | 50:50                        | 6.2                          | ( <i>S</i> ), (-)        | 8.6                          | ( <i>R</i> ), (+)        |
| <b>1g</b> | Amylose-2 <sup>a</sup>   | 50:50                        | 6.4                          | ( <i>S</i> ), (-)        | 8.9                          | ( <i>R</i> ), (+)        |
| <b>1h</b> | Amylose-2 <sup>a</sup>   | 50:50                        | 5.5                          | ( <i>S</i> ), (-)        | 6.6                          | ( <i>R</i> ), (+)        |
| <b>1i</b> | Amylose-2 <sup>a</sup>   | 50:50                        | 5.5                          | -                        | 6.2                          | -                        |
| <b>1j</b> | Amylose-2 <sup>a</sup>   | 50:50                        | 10.5                         | ( <i>R</i> ), (-)        | 13.6                         | ( <i>S</i> ), (+)        |
| <b>1k</b> | Amylose-2 <sup>a</sup>   | 50:50                        | 6.8                          | ( <i>S</i> ), (-)        | 10.6                         | ( <i>R</i> ), (+)        |
| <b>1l</b> | Amylose-2 <sup>a</sup>   | 50:50                        | 8.4                          | ( <i>S</i> ), (-)        | 10.0                         | ( <i>R</i> ), (+)        |
| <b>1m</b> | Cellulose-2 <sup>c</sup> | 50:50                        | 8.9                          | ( <i>S</i> ), (-)        | 16.1                         | ( <i>R</i> ), (+)        |
| <b>1n</b> | Amylose-2 <sup>a</sup>   | 50:50                        | 9.0                          | -                        | 27.5                         | -                        |
| <b>1o</b> | Cellulose-2 <sup>c</sup> | 50:50                        | 8.5                          | -                        | 11.6                         | -                        |
| <b>3a</b> | Cellulose-1 <sup>d</sup> | 85:15                        | 10.8                         | ( <i>S</i> ), (-)        | 15.4                         | ( <i>R</i> ), (+)        |
| <b>3b</b> | Amycoat <sup>e</sup>     | 85:15                        | 11.5                         | ( <i>S</i> ), (-)        | 14.5                         | ( <i>R</i> ), (+)        |
| <b>3c</b> | Amylose-2 <sup>a</sup>   | 85:15                        | 12.1                         | ( <i>S</i> ), (-)        | 16.9                         | ( <i>R</i> ), (+)        |
| <b>3d</b> | Amylose-2 <sup>a</sup>   | 50:50                        | 6.1                          | ( <i>R</i> ), (-)        | 10.7                         | ( <i>S</i> ), (+)        |

<sup>a</sup> Phenomenex Lux ® 5µm Amylose-2 column

<sup>b</sup> Phenomenex Lux ® 3µm Cellulose-4 column

<sup>c</sup> Phenomenex Lux ® 5µm Cellulose-2 column

<sup>d</sup> Phenomenex Lux ® 5µm Cellulose-1 column

<sup>e</sup> Kromasil ® 5-Amycoat column



# 1-adamantyl phenyl-*H*-phosphinate (**1a**)

Racemic

| Peak # | Time [min] | Area [ $\mu\text{V}\cdot\text{s}$ ] | Height [ $\mu\text{V}$ ] | Area [%] | Norm. Area [%] | BL  | Area/Height [s] |
|--------|------------|-------------------------------------|--------------------------|----------|----------------|-----|-----------------|
| 1      | 7.548      | 4663239.90                          | 391840.61                | 49.85    | 49.85          | *BB | 11.9009         |
| 2      | 13.801     | 4690666.03                          | 168118.18                | 50.15    | 50.15          | *BB | 27.9010         |
|        |            | 9353905.93                          | 559958.78                | 100.00   | 100.00         |     |                 |

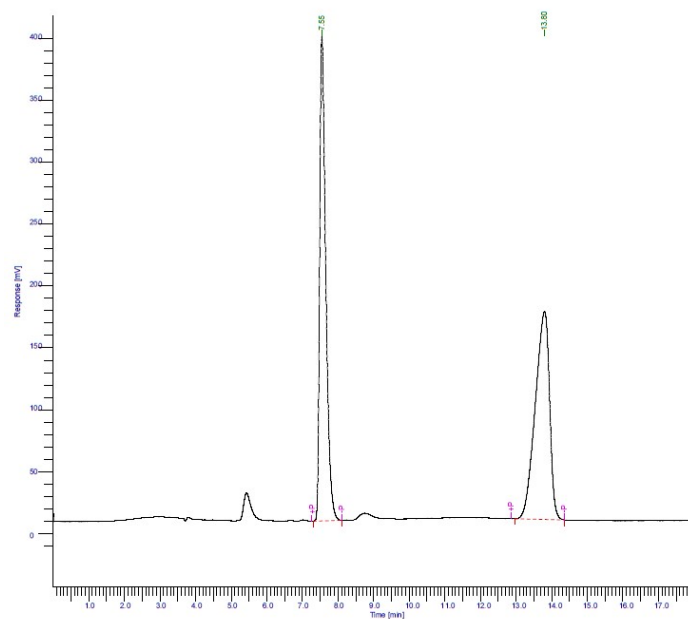

## (*R*)-**1a** (Table S3, Entry 12; Scheme 3)

| Peak # | Time [min] | Area [ $\mu\text{V}\cdot\text{s}$ ] | Height [ $\mu\text{V}$ ] | Area [%] | Norm. Area [%] | BL  | Area/Height [s] |
|--------|------------|-------------------------------------|--------------------------|----------|----------------|-----|-----------------|
| 1      | 7.507      | 19398.65                            | 1785.01                  | 0.34     | 0.34           | *BB | 10.8675         |
| 2      | 13.565     | 5732781.05                          | 197891.35                | 99.66    | 99.66          | *BB | 28.9693         |
|        |            | 5752179.70                          | 199676.36                | 100.00   | 100.00         |     |                 |

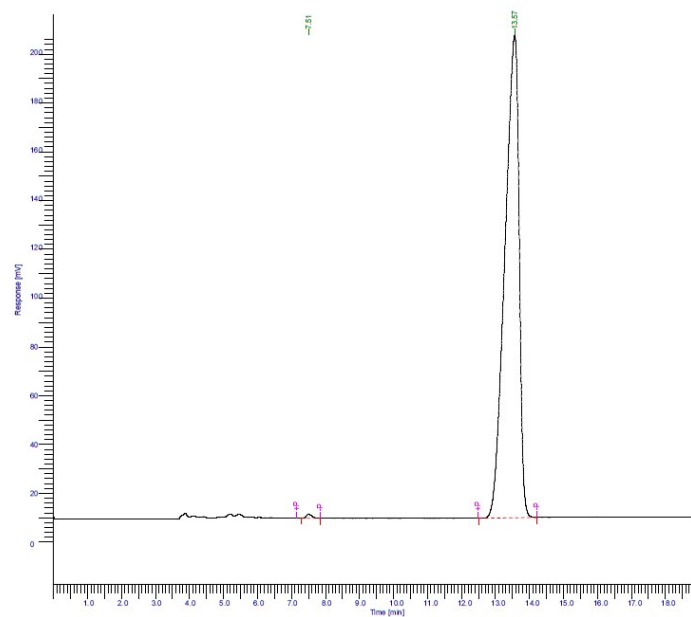

**(S)-1a (Scheme 4)**

| Peak # | Time [min] | Area [ $\mu\text{V}\cdot\text{s}$ ] | Height [ $\mu\text{V}$ ] | Area [%] | Norm. Area [%] | BL  | Area/Height [s] |
|--------|------------|-------------------------------------|--------------------------|----------|----------------|-----|-----------------|
| 1      | 7.417      | 8527418.27                          | 686098.97                | 95.73    | 95.73          | *BB | 12.4288         |
| 2      | 13.323     | 380189.26                           | 16146.94                 | 4.27     | 4.27           | *BB | 23.5456         |
|        |            | 8907607.53                          | 702245.91                | 100.00   | 100.00         |     |                 |

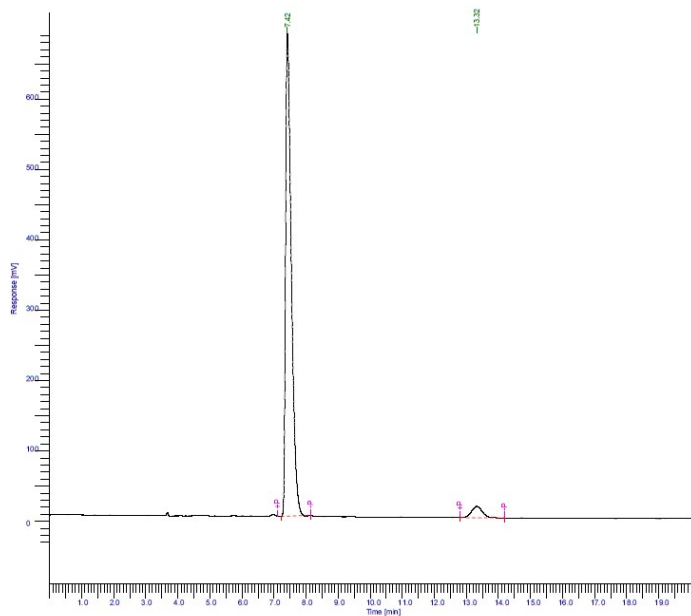

## 2-adamantyl phenyl-*H*-phosphinate (**1b**)

Racemic

| Peak # | Time [min] | Area [ $\mu\text{V}\cdot\text{s}$ ] | Height [ $\mu\text{V}$ ] | Area [%] | Norm. Area [%] | BL  | Area/Height [s] |
|--------|------------|-------------------------------------|--------------------------|----------|----------------|-----|-----------------|
| 1      | 7.483      | 3264639.35                          | 275556.38                | 49.92    | 49.92          | *BB | 11.8474         |
| 2      | 14.125     | 3275055.88                          | 106559.47                | 50.08    | 50.08          | *BB | 30.7345         |
|        |            | 6539695.23                          | 382115.85                | 100.00   | 100.00         |     |                 |

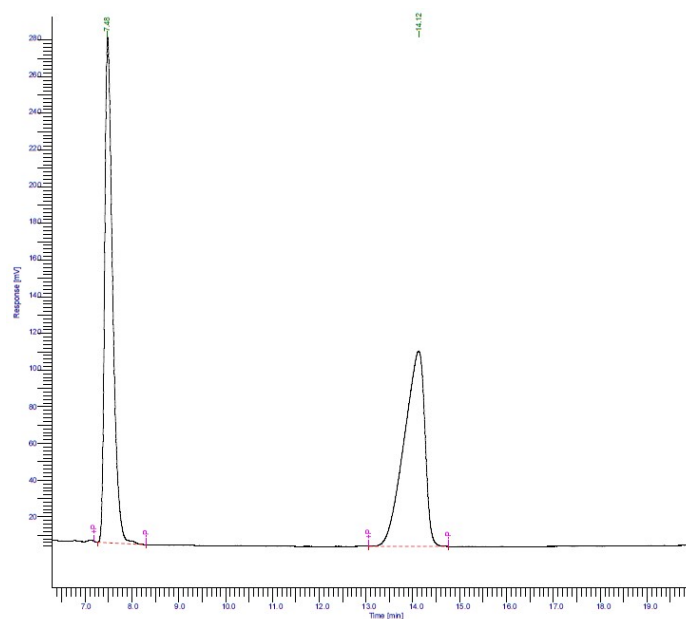

## (*R*)-**1b** (Table S4, Entry 2; Scheme 3)

| Peak # | Time [min] | Area [ $\mu\text{V}\cdot\text{s}$ ] | Height [ $\mu\text{V}$ ] | Area [%] | Norm. Area [%] | BL  | Area/Height [s] |
|--------|------------|-------------------------------------|--------------------------|----------|----------------|-----|-----------------|
| 1      | 7.598      | 9911.62                             | 908.06                   | 1.02     | 1.02           | *BB | 10.9151         |
| 2      | 14.119     | 959831.03                           | 36129.33                 | 98.98    | 98.98          | *BB | 26.5665         |
|        |            | 969742.64                           | 37037.39                 | 100.00   | 100.00         |     |                 |

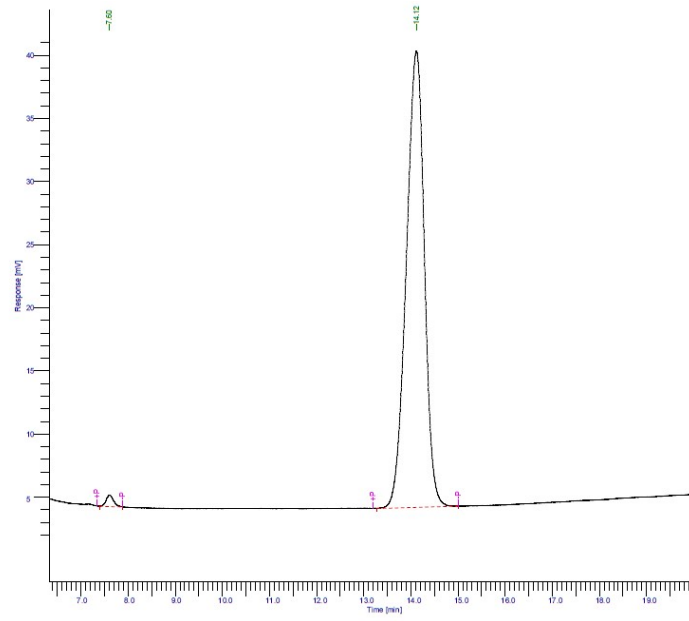

*c*-pentyl phenyl-*H*-phosphinate (**1c**)

Racemic

| Peak # | Time [min] | Area [ $\mu\text{V}\cdot\text{s}$ ] | Height [ $\mu\text{V}$ ] | Area [%] | Norm. Area [%] | BL  | Area/Height [s] |
|--------|------------|-------------------------------------|--------------------------|----------|----------------|-----|-----------------|
| 1      | 7.599      | 5101378.26                          | 425774.72                | 50.73    | 50.73          | *BB | 11.9814         |
| 2      | 8.977      | 4954262.82                          | 381561.74                | 49.27    | 49.27          | *BB | 12.9842         |
|        |            | 10055641.07                         | 807336.46                | 100.00   | 100.00         |     |                 |

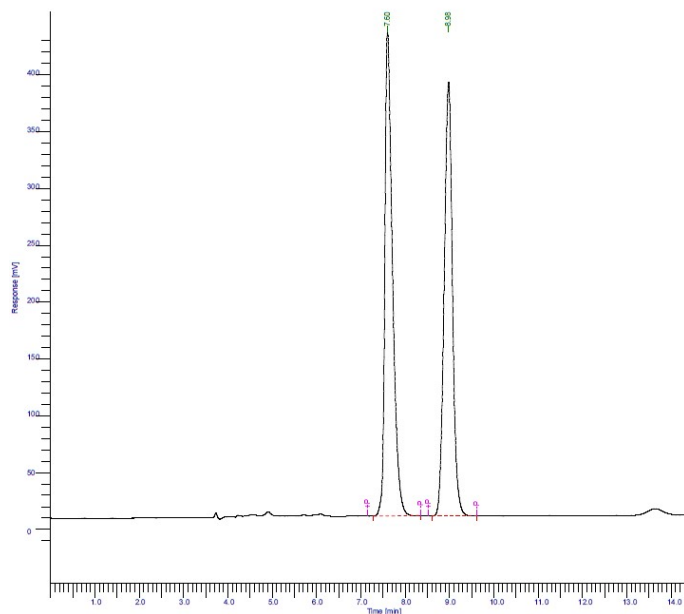

(*R*)-**1c** (Table S4, Entry 3; Scheme 3)

| Peak # | Time [min] | Area [ $\mu\text{V}\cdot\text{s}$ ] | Height [ $\mu\text{V}$ ] | Area [%] | Norm. Area [%] | BL  | Area/Height [s] |
|--------|------------|-------------------------------------|--------------------------|----------|----------------|-----|-----------------|
| 1      | 7.593      | 8596931.14                          | 664360.26                | 99.06    | 99.06          | *BB | 12.9402         |
| 2      | 8.992      | 81174.24                            | 6527.15                  | 0.94     | 0.94           | *BB | 12.4364         |
|        |            | 8678105.38                          | 670887.41                | 100.00   | 100.00         |     |                 |

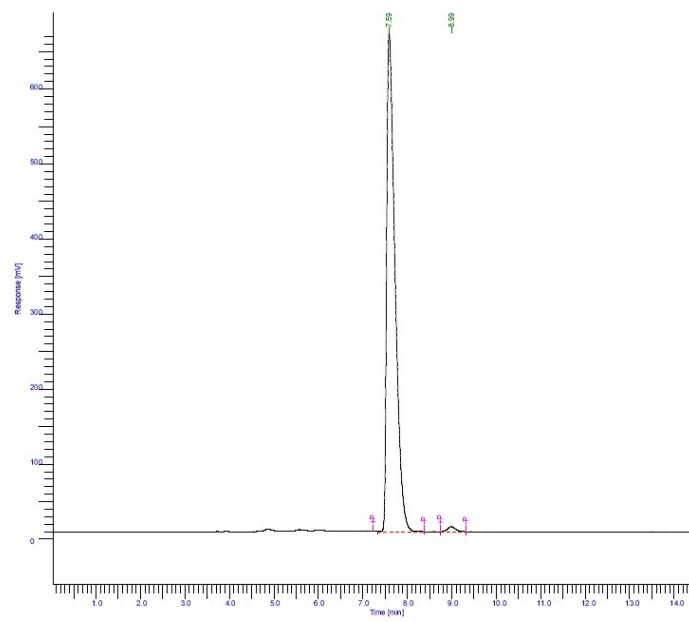

*c*-hexyl phenyl-*H*-phosphinate (**1d**)

Racemic

| Peak # | Time [min] | Area [ $\mu$ V·s] | Height [ $\mu$ V] | Area [%] | Norm. Area [%] | BL  | Area/Height [s] |
|--------|------------|-------------------|-------------------|----------|----------------|-----|-----------------|
| 1      | 7.630      | 6725882.64        | 532900.14         | 49.90    | 49.90          | *BB | 12.6213         |
| 2      | 9.809      | 6753020.68        | 394242.94         | 50.10    | 50.10          | *BB | 17.1291         |
|        |            | 13478903.32       | 927143.09         | 100.00   | 100.00         |     |                 |

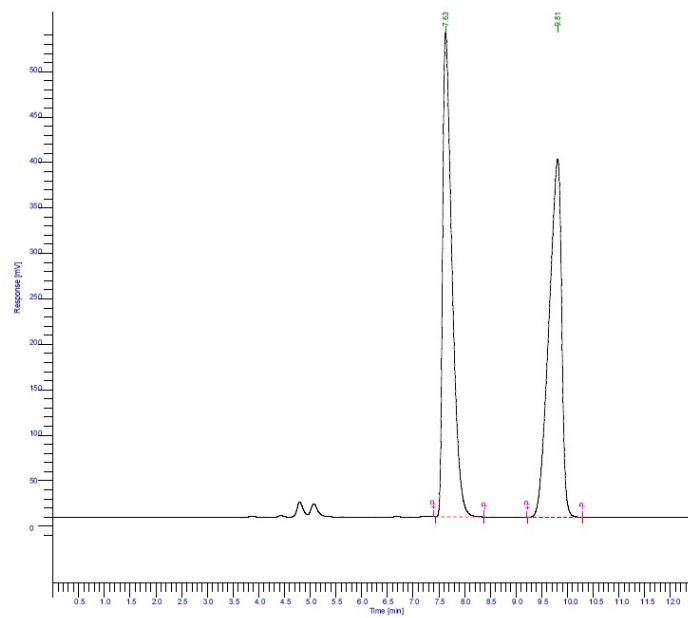

(*R*)-**1d** (Table S4, Entry 4; Scheme 3)

| Peak # | Time [min] | Area [ $\mu$ V·s] | Height [ $\mu$ V] | Area [%] | Norm. Area [%] | BL  | Area/Height [s] |
|--------|------------|-------------------|-------------------|----------|----------------|-----|-----------------|
| 1      | 7.831      | 5527330.81        | 443594.70         | 99.80    | 99.80          | *BB | 12.4603         |
| 2      | 9.970      | 11002.55          | 807.11            | 0.20     | 0.20           | *BB | 13.6321         |
|        |            | 5538333.35        | 444401.81         | 100.00   | 100.00         |     |                 |

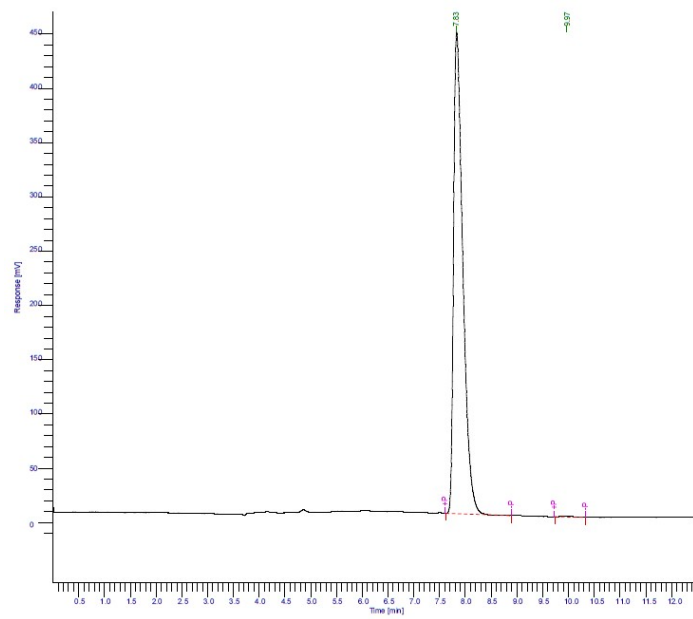



(1*R*,2*S*,5*R*)-2-isopropyl-5-methyl-*c*-hexyl phenyl-*H*-phosphinate (**1e**)

Racemic

| Peak # | Time [min] | Area [ $\mu$ V·s] | Height [ $\mu$ V] | Area [%] | Norm. Area [%] | BL  | Area/Height [s] |
|--------|------------|-------------------|-------------------|----------|----------------|-----|-----------------|
| 1      | 7.527      | 3250716.69        | 286238.66         | 40.89    | 40.89          | *BB | 11.3567         |
| 2      | 10.074     | 4699877.01        | 258048.21         | 59.11    | 59.11          | *BB | 18.2132         |
|        |            | 7950593.71        | 544286.87         | 100.00   | 100.00         |     |                 |

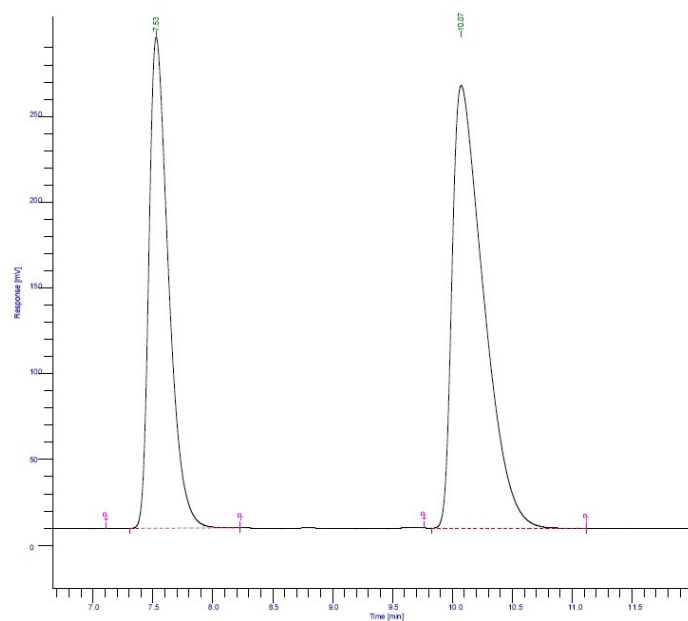

(*R<sub>p</sub>*)-**1e** (Table S4, Entry 5; Scheme 3)

| Peak # | Time [min] | Area [ $\mu$ V·s] | Height [ $\mu$ V] | Area [%] | Norm. Area [%] | BL  | Area/Height [s] |
|--------|------------|-------------------|-------------------|----------|----------------|-----|-----------------|
| 1      | 7.352      | 14076.99          | 1166.83           | 1.81     | 1.81           | *BB | 12.0643         |
| 2      | 9.763      | 763207.18         | 49832.31          | 98.19    | 98.19          | *BB | 15.3155         |
|        |            | 777284.16         | 50999.14          | 100.00   | 100.00         |     |                 |

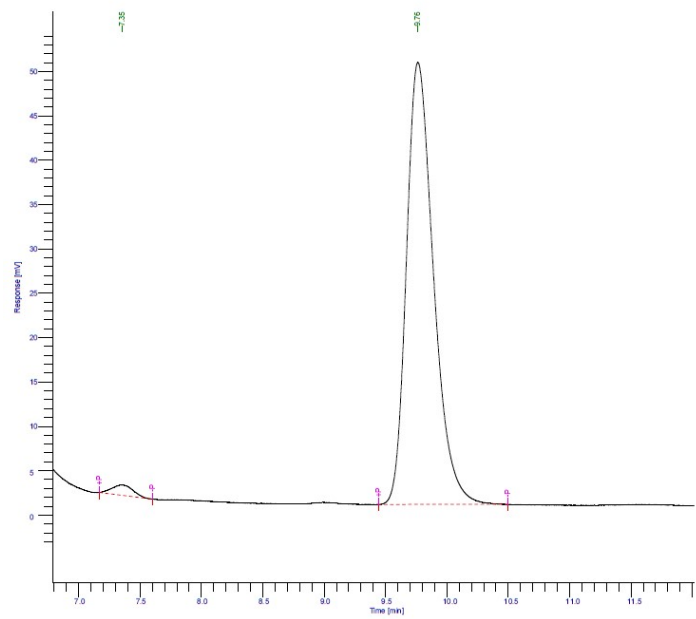

*c*-heptyl phenyl-*H*-phosphinate (**1f**)

Racemic

| Peak # | Time [min] | Area [ $\mu$ V·s] | Height [ $\mu$ V] | Area [%] | Norm. Area [%] | BL  | Area/Height [s] |
|--------|------------|-------------------|-------------------|----------|----------------|-----|-----------------|
| 1      | 6.167      | 3398492.69        | 522456.57         | 49.62    | 49.62          | *BB | 6.5048          |
| 2      | 8.591      | 3451169.62        | 282295.74         | 50.38    | 50.38          | *BB | 12.2254         |
|        |            | 6849662.31        | 804752.31         | 100.00   | 100.00         |     |                 |

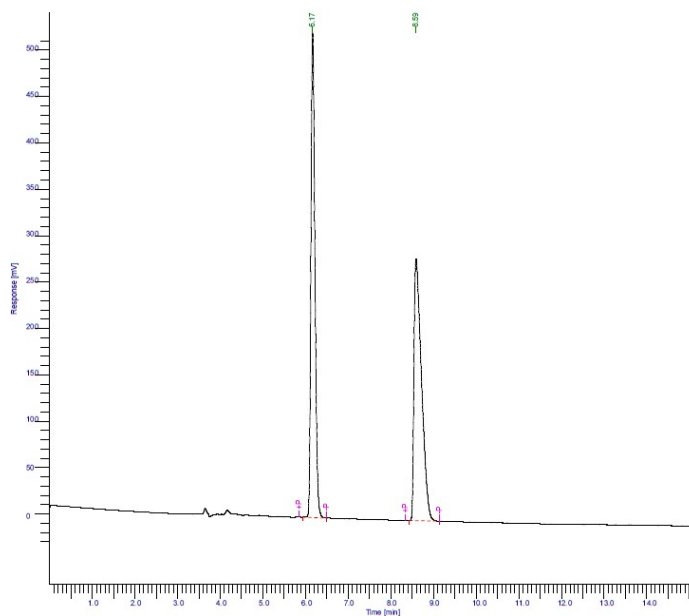

(*R*)-**1f** (Table S4, Entry 6; Scheme 3)

| Peak # | Time [min] | Area [ $\mu$ V·s] | Height [ $\mu$ V] | Area [%] | Norm. Area [%] | BL  | Area/Height [s] |
|--------|------------|-------------------|-------------------|----------|----------------|-----|-----------------|
| 1      | 6.393      | 13864.67          | 2193.29           | 0.18     | 0.18           | *BB | 6.3214          |
| 2      | 8.767      | 7640664.10        | 474442.76         | 99.82    | 99.82          | *BB | 16.1045         |
|        |            | 7654528.76        | 476636.06         | 100.00   | 100.00         |     |                 |

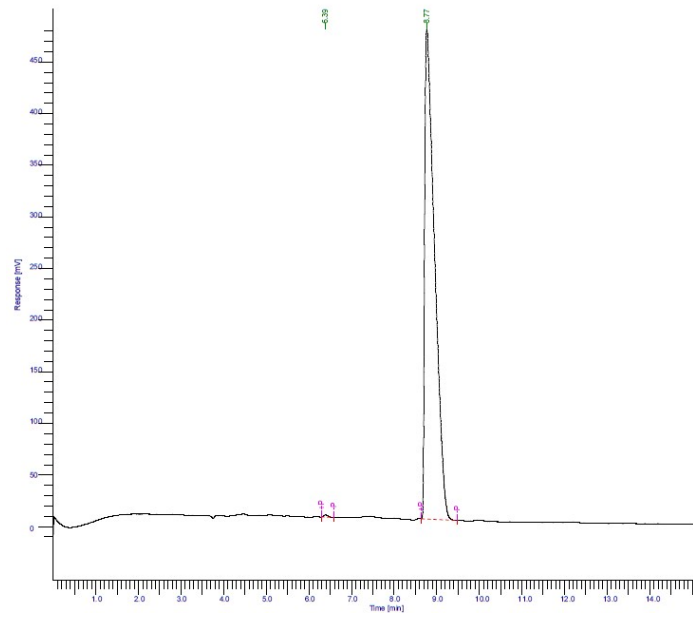

# 1-methyl-*c*-hexyl phenyl-*H*-phosphinate (**1g**)

Racemic

| Peak # | Time [min] | Area [ $\mu\text{V}\cdot\text{s}$ ] | Height [ $\mu\text{V}$ ] | Area [%] | Norm. Area [%] | BL  | Area/Height [s] |
|--------|------------|-------------------------------------|--------------------------|----------|----------------|-----|-----------------|
| 1      | 6.353      | 3760592.75                          | 388415.66                | 50.57    | 50.57          | *BB | 9.6819          |
| 2      | 8.922      | 3675755.46                          | 238939.09                | 49.43    | 49.43          | *BB | 15.3837         |
|        |            | 7436348.20                          | 627354.75                | 100.00   | 100.00         |     |                 |

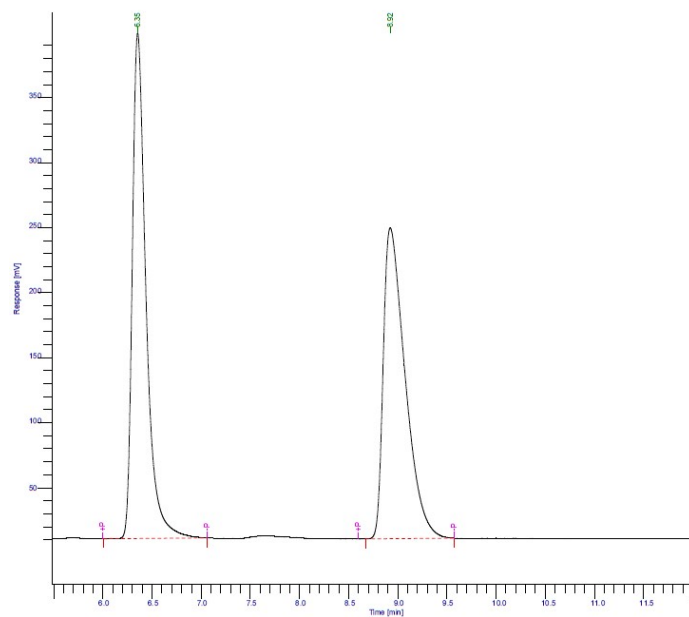

## (*R*)-**1g** (Table S4, Entry 8; Scheme 3)

| Peak # | Time [min] | Area [ $\mu\text{V}\cdot\text{s}$ ] | Height [ $\mu\text{V}$ ] | Area [%] | Norm. Area [%] | BL  | Area/Height [s] |
|--------|------------|-------------------------------------|--------------------------|----------|----------------|-----|-----------------|
| 1      | 6.356      | 14761.79                            | 1745.72                  | 2.14     | 2.14           | *BB | 8.4560          |
| 2      | 8.999      | 675926.58                           | 50688.18                 | 97.86    | 97.86          | *BB | 13.3350         |
|        |            | 690688.37                           | 52433.90                 | 100.00   | 100.00         |     |                 |

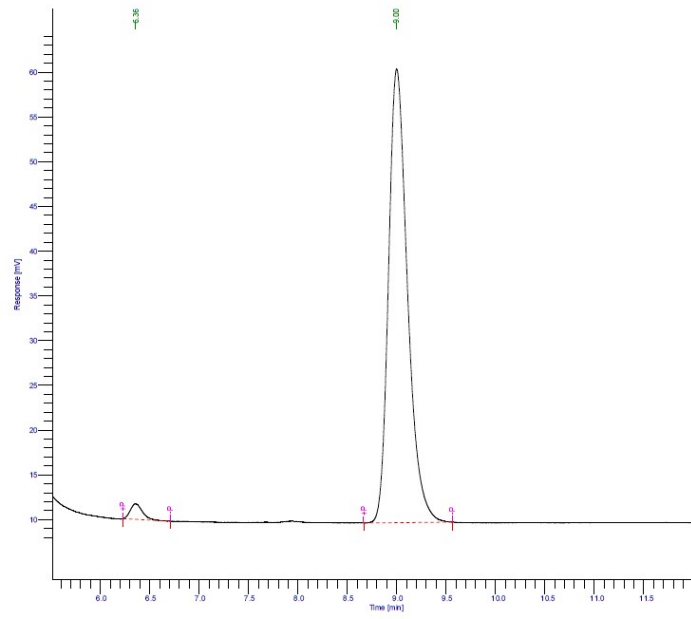

*t*-butyl phenyl-*H*-phosphinate (**1h**)

Racemic

| Peak # | Time [min] | Area [ $\mu$ V·s] | Height [ $\mu$ V] | Area [%] | Norm. Area [%] | BL  | Area/Height [s] |
|--------|------------|-------------------|-------------------|----------|----------------|-----|-----------------|
| 1      | 5.529      | 4133793.23        | 532879.99         | 48.40    | 48.40          | *BB | 7.7575          |
| 2      | 6.603      | 4407665.06        | 446176.24         | 51.60    | 51.60          | *BB | 9.8788          |
|        |            | 8541458.29        | 979056.23         | 100.00   | 100.00         |     |                 |

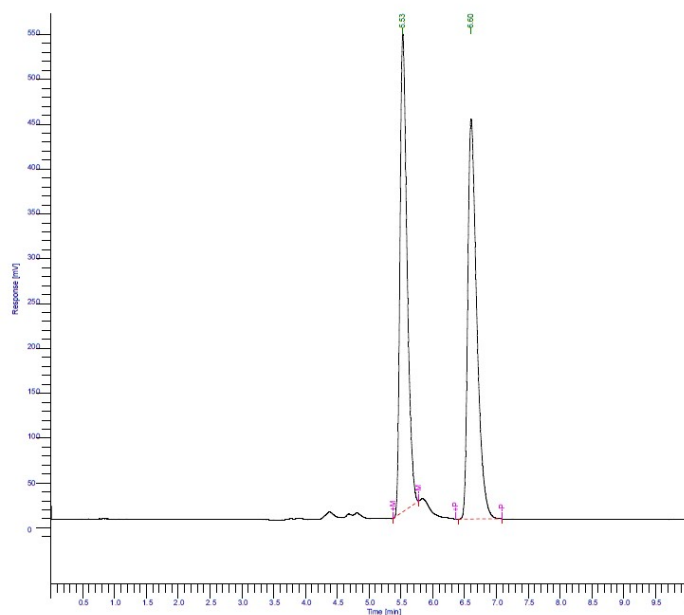

(*S*)-**1h** (Table S4, Entry 9; Scheme 3)

| Peak # | Time [min] | Area [ $\mu$ V·s] | Height [ $\mu$ V] | Area [%] | Norm. Area [%] | BL  | Area/Height [s] |
|--------|------------|-------------------|-------------------|----------|----------------|-----|-----------------|
| 1      | 5.541      | 7511633.76        | 884197.17         | 99.49    | 99.49          | *BB | 8.4954          |
| 2      | 6.684      | 38262.37          | 4339.48           | 0.51     | 0.51           | *BB | 8.8173          |
|        |            | 7549896.13        | 888536.65         | 100.00   | 100.00         |     |                 |

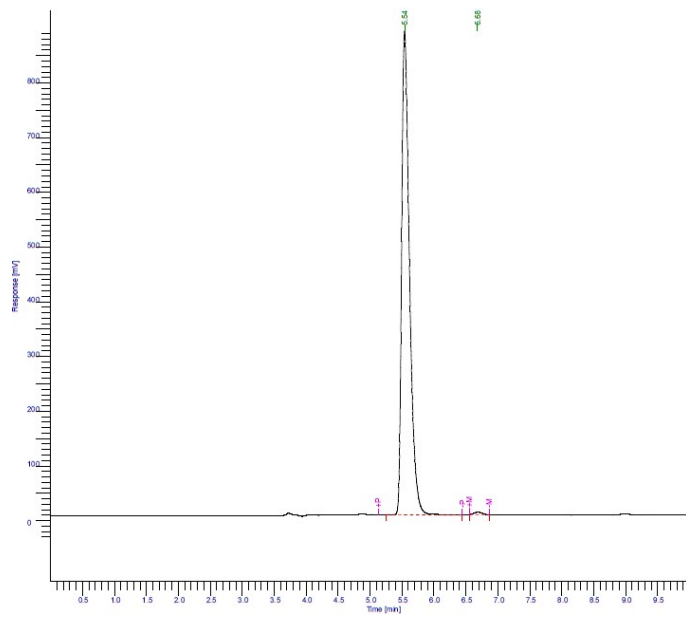



# 2,4-dimethyl-pent-3-yl phenyl-*H*-phosphinate (**1i**)

Racemic

| Peak # | Time [min] | Area [ $\mu\text{V}\cdot\text{s}$ ] | Height [ $\mu\text{V}$ ] | Area [%] | Norm. Area [%] | BL  | Area/Height [s] |
|--------|------------|-------------------------------------|--------------------------|----------|----------------|-----|-----------------|
| 1      | 5.481      | 2677404.46                          | 342033.21                | 50.09    | 50.09          | *BB | 7.8279          |
| 2      | 6.173      | 2668165.77                          | 299660.60                | 49.91    | 49.91          | *BB | 8.9040          |
|        |            | 5345570.23                          | 641693.81                | 100.00   | 100.00         |     |                 |

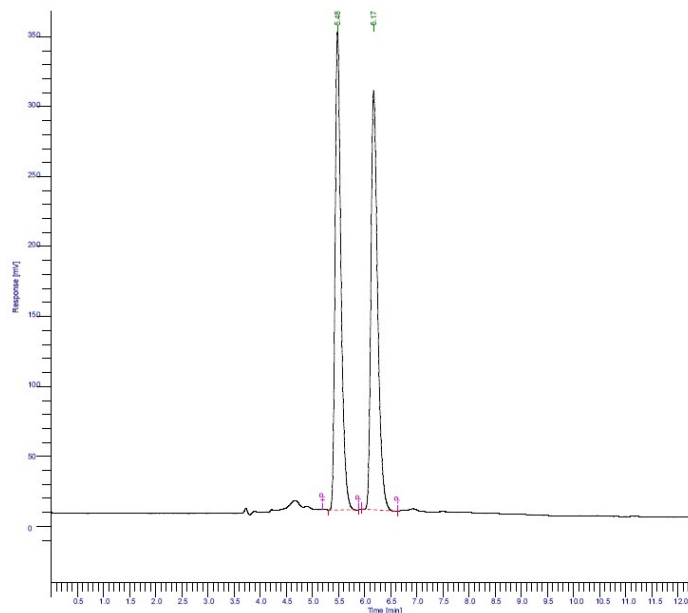

benzyl phenyl-*H*-phosphinate (**1j**)

Racemic

| Peak # | Time [min] | Area [ $\mu\text{V}\cdot\text{s}$ ] | Height [ $\mu\text{V}$ ] | Area [%] | Norm. Area [%] | BL  | Area/Height [s] |
|--------|------------|-------------------------------------|--------------------------|----------|----------------|-----|-----------------|
| 1      | 10.467     | 2872469.08                          | 194541.30                | 49.95    | 49.95          | *BB | 14.7653         |
| 2      | 13.621     | 2877954.85                          | 124806.12                | 50.05    | 50.05          | *BB | 23.0594         |
|        |            | 5750423.93                          | 319347.42                | 100.00   | 100.00         |     |                 |

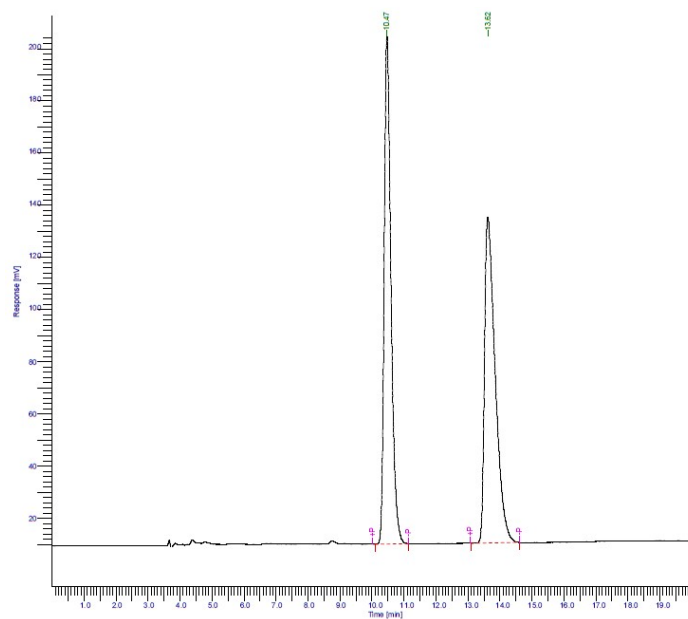

(*R*)-**1j** (Table S4, Entry 12; Scheme 3)

| Peak # | Time [min] | Area [ $\mu\text{V}\cdot\text{s}$ ] | Height [ $\mu\text{V}$ ] | Area [%] | Norm. Area [%] | BL  | Area/Height [s] |
|--------|------------|-------------------------------------|--------------------------|----------|----------------|-----|-----------------|
| 1      | 10.491     | 17085257.30                         | 974942.94                | 99.83    | 99.83          | *BB | 17.5244         |
| 2      | 14.051     | 29634.25                            | 1571.41                  | 0.17     | 0.17           | *BB | 18.8583         |
|        |            | 17114891.55                         | 976514.36                | 100.00   | 100.00         |     |                 |

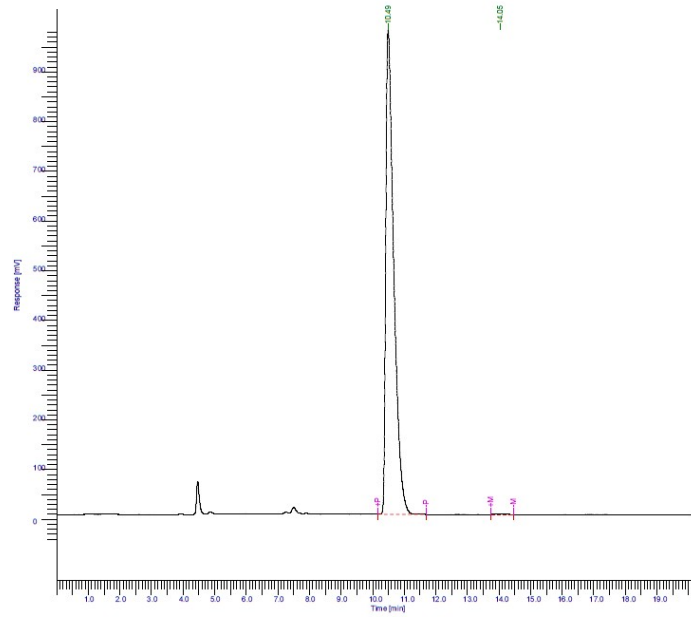

# 1-adamantyl (2-methylphenyl)-*H*-phosphinate (**1k**)

Racemic

| Peak # | Time [min] | Area [ $\mu\text{V}\cdot\text{s}$ ] | Height [ $\mu\text{V}$ ] | Area [%] | Norm. Area [%] | BL  | Area/Height [s] |
|--------|------------|-------------------------------------|--------------------------|----------|----------------|-----|-----------------|
| 1      | 6.788      | 3653033.00                          | 346468.65                | 49.93    | 49.93          | *BB | 10.5436         |
| 2      | 10.578     | 3663717.77                          | 192912.08                | 50.07    | 50.07          | *BB | 18.9916         |
|        |            | 7316750.77                          | 539380.73                | 100.00   | 100.00         |     |                 |

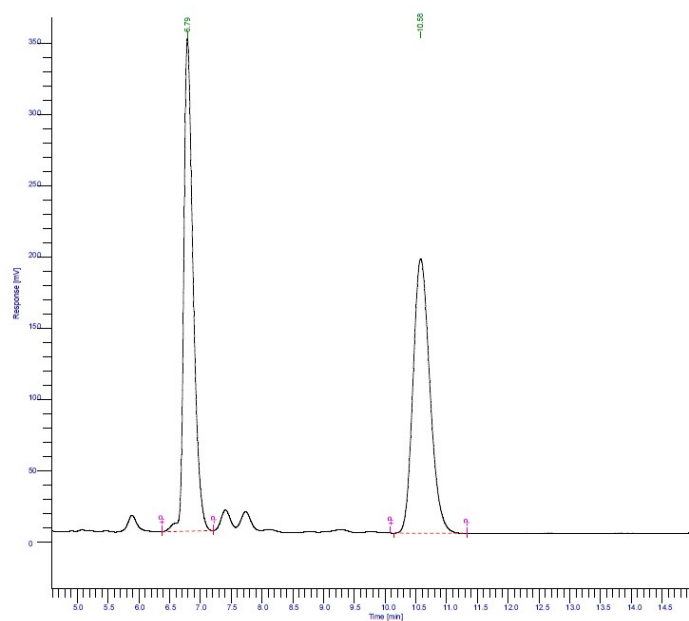

(*R*)-**1k** (Table S5, Entry 1; Scheme 3)

| Peak # | Time [min] | Area [ $\mu\text{V}\cdot\text{s}$ ] | Height [ $\mu\text{V}$ ] | Area [%] | Norm. Area [%] | BL  | Area/Height [s] |
|--------|------------|-------------------------------------|--------------------------|----------|----------------|-----|-----------------|
| 1      | 7.006      | 18188.05                            | 1828.98                  | 0.88     | 0.88           | *BB | 9.9444          |
| 2      | 10.866     | 2037460.11                          | 103728.73                | 99.12    | 99.12          | *BB | 19.6422         |
|        |            | 2055648.17                          | 105557.71                | 100.00   | 100.00         |     |                 |

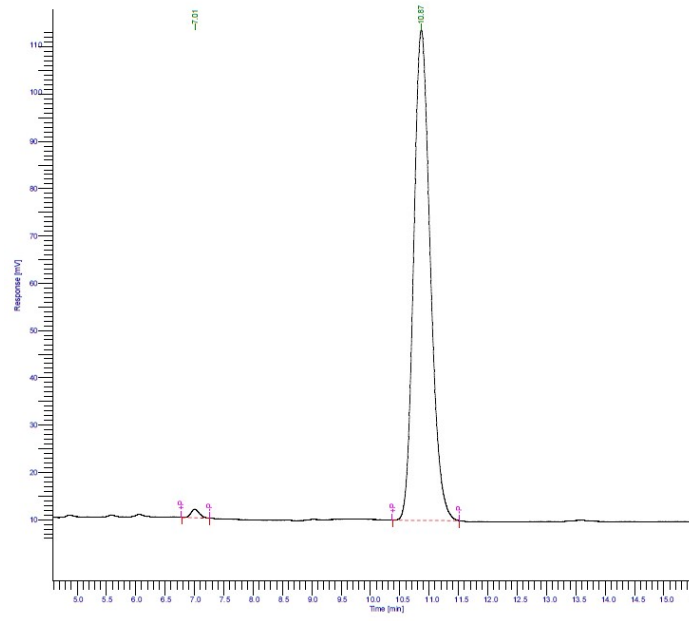

# 1-adamantyl (3-methylphenyl)-*H*-phosphinate (**11**)

Racemic

| Peak # | Time [min] | Area [ $\mu\text{V}\cdot\text{s}$ ] | Height [ $\mu\text{V}$ ] | Area [%] | Norm. Area [%] | BL  | Area/Height [s] |
|--------|------------|-------------------------------------|--------------------------|----------|----------------|-----|-----------------|
| 1      | 8.431      | 5322356.26                          | 321685.02                | 50.25    | 50.25          | BB  | 16.5452         |
| 2      | 9.988      | 5270062.81                          | 288202.97                | 49.75    | 49.75          | *BB | 18.2859         |
|        |            | 10592419.07                         | 609887.98                | 100.00   | 100.00         |     |                 |

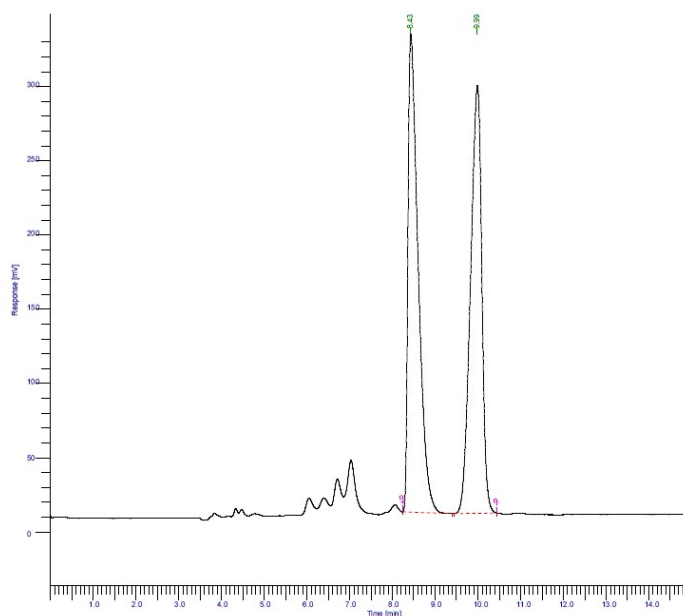

(*R*)-**11** (Table S5, Entry 2; Scheme 3)

| Peak # | Time [min] | Area [ $\mu\text{V}\cdot\text{s}$ ] | Height [ $\mu\text{V}$ ] | Area [%] | Norm. Area [%] | BL  | Area/Height [s] |
|--------|------------|-------------------------------------|--------------------------|----------|----------------|-----|-----------------|
| 1      | 8.564      | 473851.85                           | 36847.33                 | 4.52     | 4.52           | *BB | 12.8599         |
| 2      | 10.073     | 10014006.61                         | 473229.05                | 95.48    | 95.48          | *BB | 21.1610         |
|        |            | 10487858.46                         | 510076.37                | 100.00   | 100.00         |     |                 |

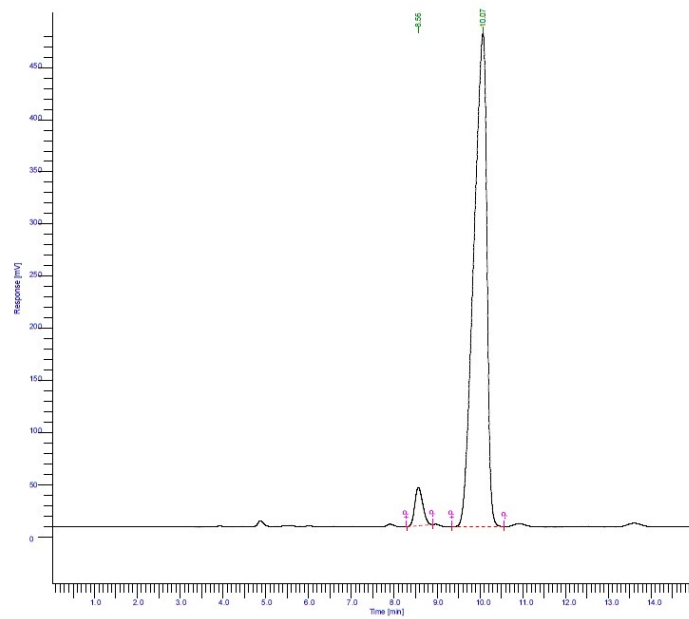

# 1-adamantyl (4-methylphenyl)-*H*-phosphinate (**1m**)

Racemic

| Peak # | Time [min] | Area [ $\mu\text{V}\cdot\text{s}$ ] | Height [ $\mu\text{V}$ ] | Area [%] | Norm. Area [%] | BL  | Area/Height [s] |
|--------|------------|-------------------------------------|--------------------------|----------|----------------|-----|-----------------|
| 1      | 8.861      | 2895924.29                          | 194936.76                | 51.66    | 51.66          | *BB | 14.8557         |
| 2      | 16.108     | 2709458.70                          | 88098.88                 | 48.34    | 48.34          | *BB | 30.7547         |
|        |            | 5605382.99                          | 283035.65                | 100.00   | 100.00         |     |                 |

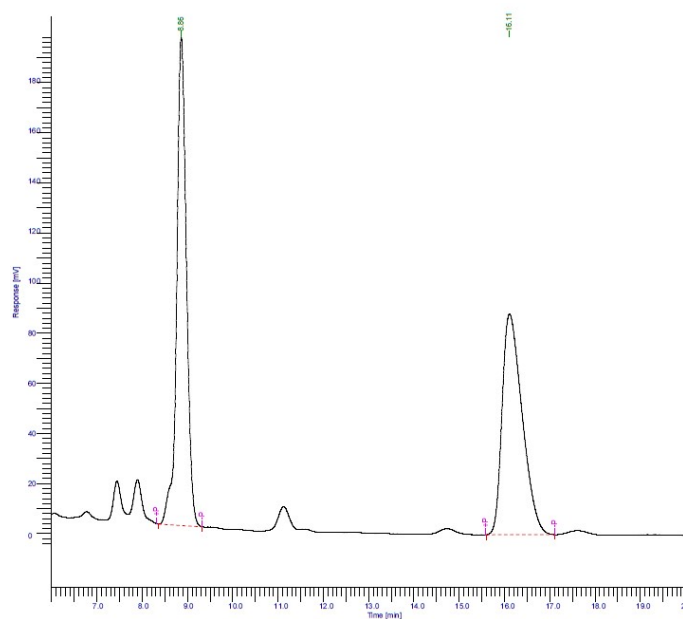

# (*R*)-**1m** (Table S5, Entry 3; Scheme 3)

| Peak # | Time [min] | Area [ $\mu\text{V}\cdot\text{s}$ ] | Height [ $\mu\text{V}$ ] | Area [%] | Norm. Area [%] | BL  | Area/Height [s] |
|--------|------------|-------------------------------------|--------------------------|----------|----------------|-----|-----------------|
| 1      | 9.100      | 4130.47                             | 349.84                   | 0.06     | 0.06           | *BB | 11.8067         |
| 2      | 15.773     | 7072927.66                          | 192242.14                | 99.94    | 99.94          | *BB | 36.7918         |
|        |            | 7077058.12                          | 192591.98                | 100.00   | 100.00         |     |                 |



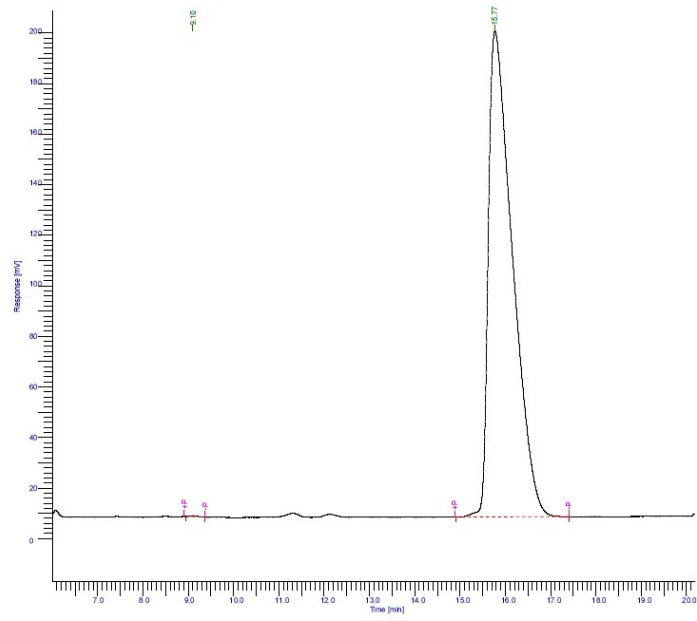

# 1-adamantyl (4-methoxyphenyl)-*H*-phosphinate (**1n**)

Racemic

| Peak # | Time [min] | Area [ $\mu\text{V}\cdot\text{s}$ ] | Height [ $\mu\text{V}$ ] | Area [%] | Norm. Area [%] | BL  | Area/Height [s] |
|--------|------------|-------------------------------------|--------------------------|----------|----------------|-----|-----------------|
| 1      | 8.952      | 10323180.41                         | 731715.44                | 47.74    | 47.74          | *BB | 14.1082         |
| 2      | 27.455     | 11301862.90                         | 158468.88                | 52.26    | 52.26          | *BB | 71.3191         |
|        |            | 21625043.31                         | 890184.32                | 100.00   | 100.00         |     |                 |

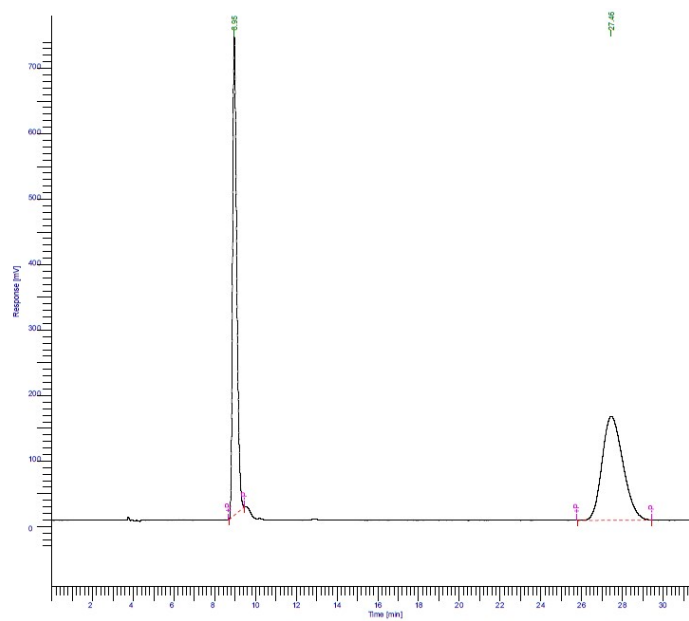

# 1-adamantyl 1-naphthyl-*H*-phosphinate (**1o**)

Racemic

| Peak # | Time [min] | Area [ $\mu\text{V}\cdot\text{s}$ ] | Height [ $\mu\text{V}$ ] | Area [%] | Norm. Area [%] | BL  | Area/Height [s] |
|--------|------------|-------------------------------------|--------------------------|----------|----------------|-----|-----------------|
| 1      | 8.503      | 7021550.98                          | 510547.55                | 49.94    | 49.94          | *BB | 13.7530         |
| 2      | 11.577     | 7037572.45                          | 350385.41                | 50.06    | 50.06          | *BB | 20.0852         |
|        |            | 14059123.43                         | 860932.96                | 100.00   | 100.00         |     |                 |

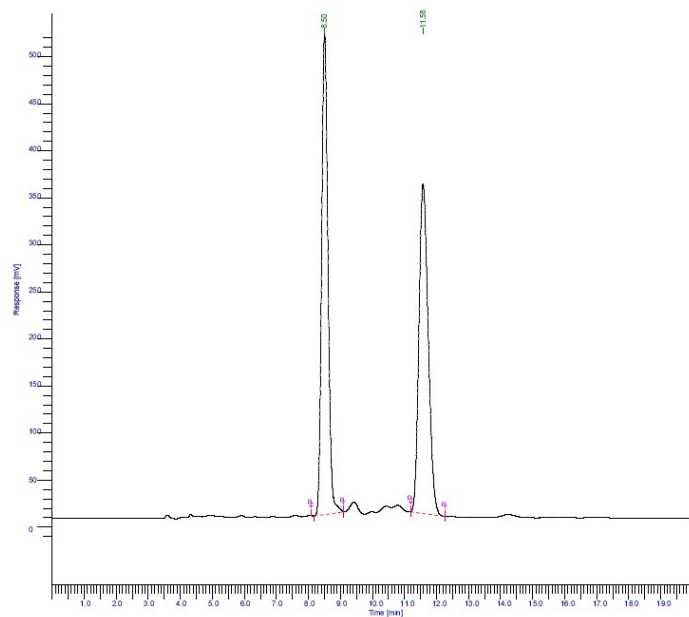

## (2-methoxyphenyl)-phenylphosphine oxide (**3a**)

Racemic

| Peak # | Time [min] | Area [ $\mu\text{V}\cdot\text{s}$ ] | Height [ $\mu\text{V}$ ] | Area [%] | Norm. Area [%] | BL  | Area/Height [s] |
|--------|------------|-------------------------------------|--------------------------|----------|----------------|-----|-----------------|
| 1      | 10.810     | 8782304.23                          | 486920.14                | 49.82    | 49.82          | *BB | 18.0364         |
| 2      | 15.395     | 8846850.67                          | 358610.06                | 50.18    | 50.18          | *BB | 24.6698         |
|        |            | 17629154.89                         | 845530.20                | 100.00   | 100.00         |     |                 |

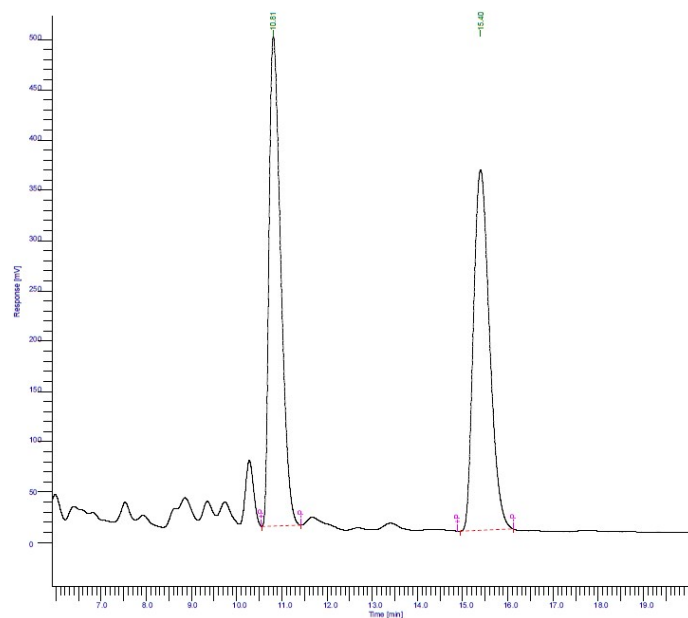

## (*R*)-**3a** (Scheme 5)

| Peak # | Time [min] | Area [ $\mu\text{V}\cdot\text{s}$ ] | Height [ $\mu\text{V}$ ] | Area [%] | Norm. Area [%] | BL  | Area/Height [s] |
|--------|------------|-------------------------------------|--------------------------|----------|----------------|-----|-----------------|
| 1      | 11.074     | 405637.53                           | 25992.47                 | 2.70     | 2.70           | *BB | 15.6060         |
| 2      | 15.696     | 14637766.30                         | 583603.61                | 97.30    | 97.30          | *BB | 25.0817         |
|        |            | 15043403.83                         | 609596.08                | 100.00   | 100.00         |     |                 |

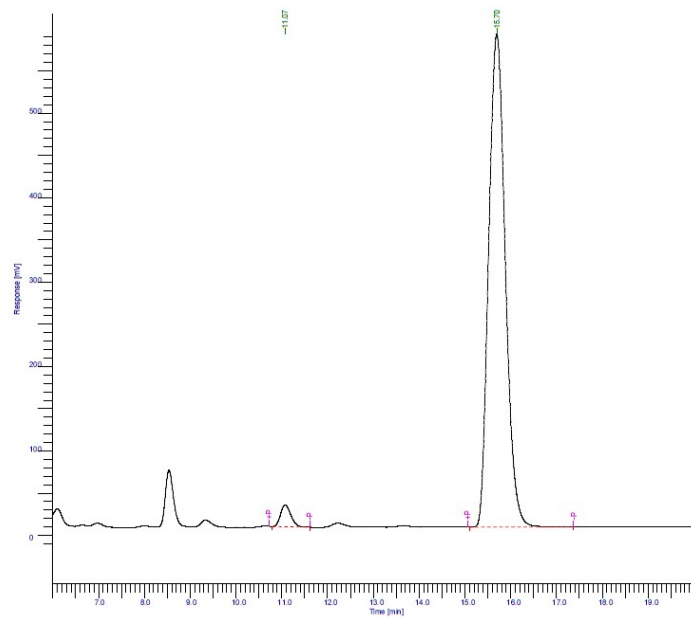

## (2-methoxyphenyl)-methyl-phenylphosphine oxide (**3b**)

Racemic

| Peak # | Time [min] | Area [ $\mu\text{V}\cdot\text{s}$ ] | Height [ $\mu\text{V}$ ] | Area [%] | Norm. Area [%] | BL  | Area/Height [s] |
|--------|------------|-------------------------------------|--------------------------|----------|----------------|-----|-----------------|
| 1      | 11.498     | 5784253.79                          | 188498.35                | 50.11    | 50.11          | *BB | 30.6860         |
| 2      | 14.471     | 5758503.18                          | 147231.28                | 49.89    | 49.89          | *BB | 39.1120         |
|        |            | 11542756.97                         | 335729.63                | 100.00   | 100.00         |     |                 |

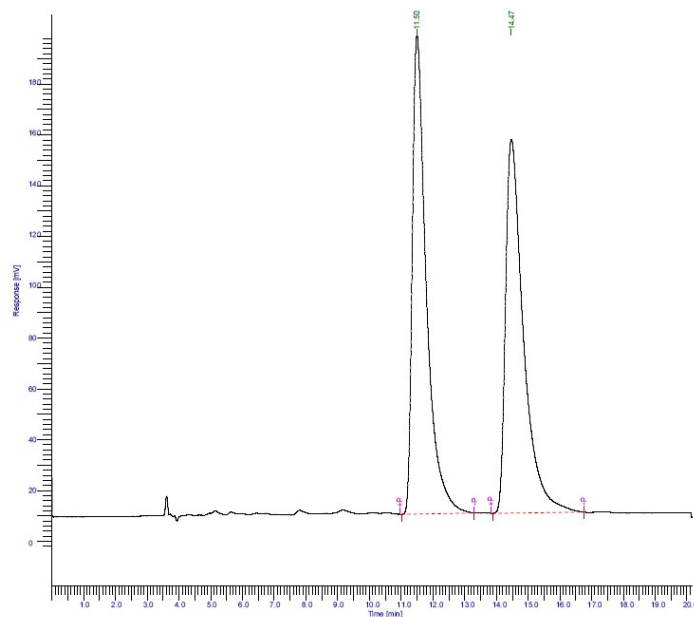

## (*R*)-**3b** (Scheme 5)

| Peak # | Time [min] | Area [ $\mu\text{V}\cdot\text{s}$ ] | Height [ $\mu\text{V}$ ] | Area [%] | Norm. Area [%] | BL  | Area/Height [s] |
|--------|------------|-------------------------------------|--------------------------|----------|----------------|-----|-----------------|
| 1      | 11.693     | 269526.65                           | 10460.02                 | 1.61     | 1.61           | *BB | 25.7673         |
| 2      | 14.336     | 16429609.92                         | 367707.63                | 98.39    | 98.39          | *BB | 44.6812         |
|        |            | 16699136.57                         | 378167.65                | 100.00   | 100.00         |     |                 |

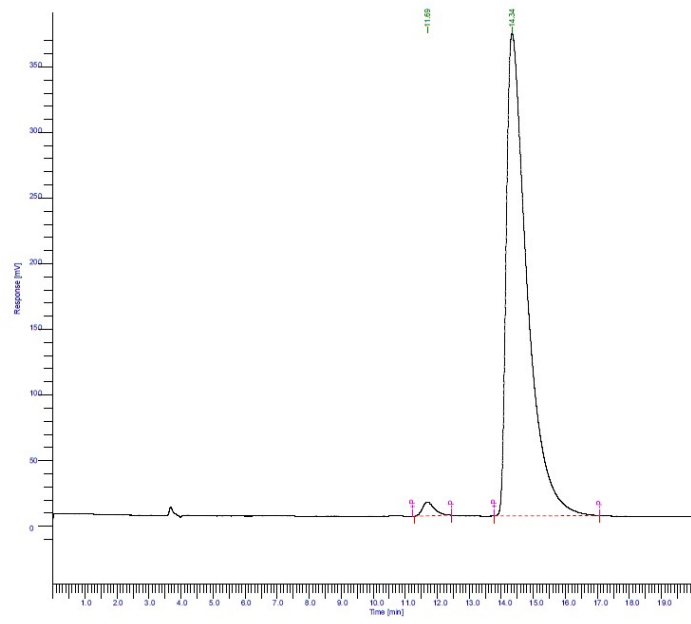

*c*-hexyl-(2-methoxyphenyl)-methylphosphine-oxide (**3c**)

Racemic

| Peak # | Time [min] | Area [ $\mu\text{V}\cdot\text{s}$ ] | Height [ $\mu\text{V}$ ] | Area [%] | Norm. Area [%] | BL  | Area/Height [s] |
|--------|------------|-------------------------------------|--------------------------|----------|----------------|-----|-----------------|
| 1      | 12.132     | 1776952.09                          | 90585.83                 | 49.94    | 49.94          | *BB | 19.6162         |
| 2      | 16.913     | 1781192.38                          | 55145.41                 | 50.06    | 50.06          | *BB | 32.2999         |
|        |            | 3558144.48                          | 145731.24                | 100.00   | 100.00         |     |                 |

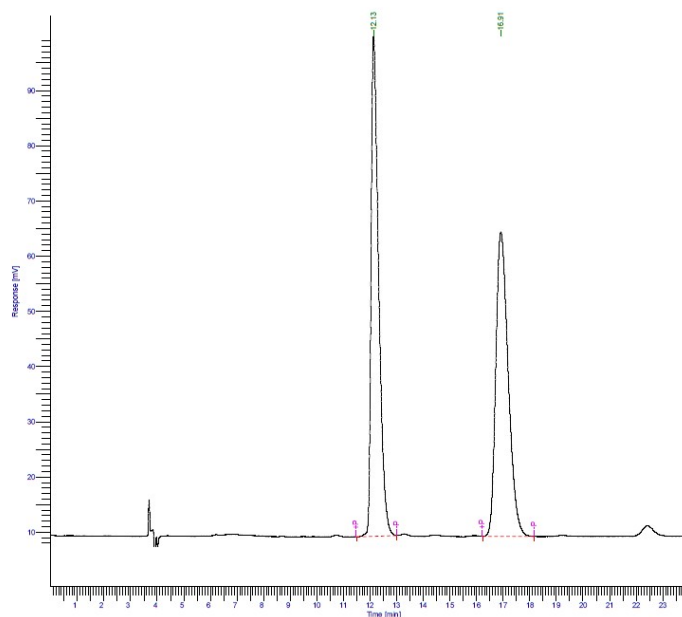

(*R*)-**3c** (Scheme 5)

| Peak # | Time [min] | Area [ $\mu\text{V}\cdot\text{s}$ ] | Height [ $\mu\text{V}$ ] | Area [%] | Norm. Area [%] | BL  | Area/Height [s] |
|--------|------------|-------------------------------------|--------------------------|----------|----------------|-----|-----------------|
| 1      | 12.581     | 288926.36                           | 11072.72                 | 2.56     | 2.56           | *BB | 26.0935         |
| 2      | 17.707     | 10981744.91                         | 228218.94                | 97.44    | 97.44          | *BB | 48.1193         |
|        |            | 11270671.26                         | 239291.66                | 100.00   | 100.00         |     |                 |



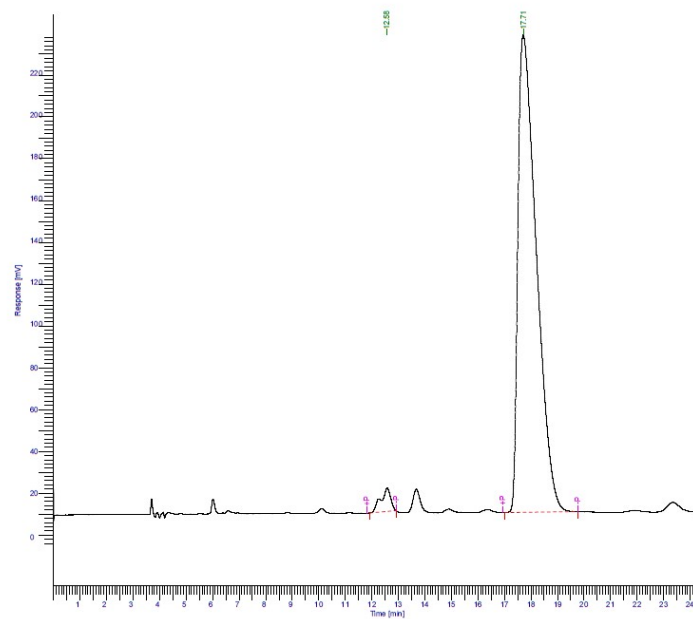

# 1-adamantyl-phenylphosphonamidate (**3d**)

Racemic

| Peak # | Time [min] | Area [ $\mu\text{V}\cdot\text{s}$ ] | Height [ $\mu\text{V}$ ] | Area [%] | Norm. Area [%] | BL  | Area/Height [s] |
|--------|------------|-------------------------------------|--------------------------|----------|----------------|-----|-----------------|
| 1      | 6.065      | 1525698.74                          | 138581.45                | 49.64    | 49.64          | *BB | 11.0094         |
| 2      | 10.727     | 1547982.84                          | 52443.44                 | 50.36    | 50.36          | *BB | 29.5172         |
|        |            | 3073681.58                          | 191024.89                | 100.00   | 100.00         |     |                 |

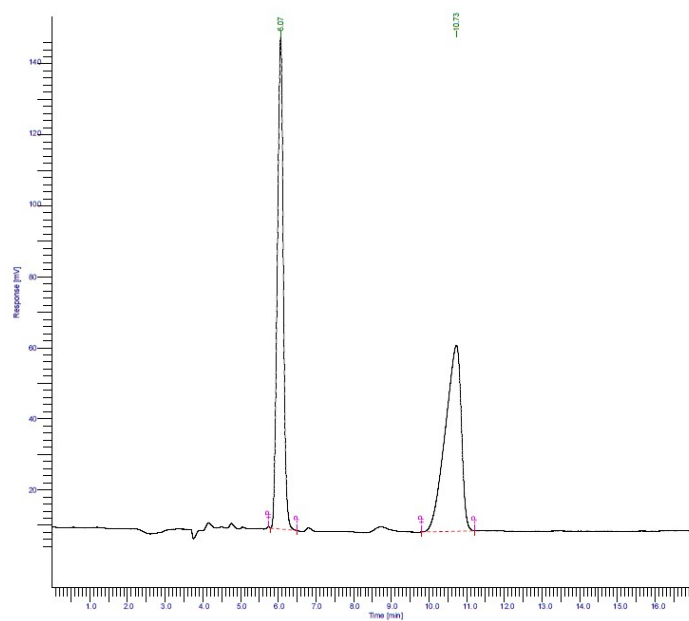

(*R*)-**3d** (Scheme 5)

| Peak # | Time [min] | Area [ $\mu\text{V}\cdot\text{s}$ ] | Height [ $\mu\text{V}$ ] | Area [%] | Norm. Area [%] | BL  | Area/Height [s] |
|--------|------------|-------------------------------------|--------------------------|----------|----------------|-----|-----------------|
| 1      | 6.040      | 4802478.93                          | 348279.10                | 99.35    | 99.35          | *BB | 13.7892         |
| 2      | 10.208     | 31475.38                            | 1296.66                  | 0.65     | 0.65           | *BB | 24.2743         |
|        |            | 4833954.31                          | 349575.75                | 100.00   | 100.00         |     |                 |

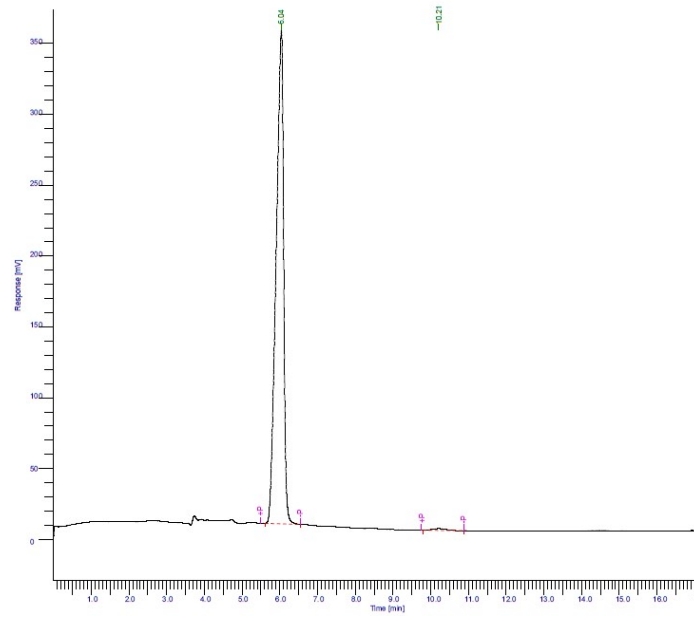

### 1-adamantyl-phenylphosphonothioic acid (**3f**)

The enantiomeric excess (*ee*) values of **3f** were determined by  $^{31}\text{P}$  NMR using 6.2 mg (20  $\mu\text{mol}$ ) of the analyte, 3.9  $\mu\text{L}$  (30  $\mu\text{mol}$ ) (*S*)-1-phenylethylamine as CSA and 750  $\mu\text{L}$   $\text{CDCl}_3$  as solvent.

Racemic **3f** + (*S*)-phenylethylamine

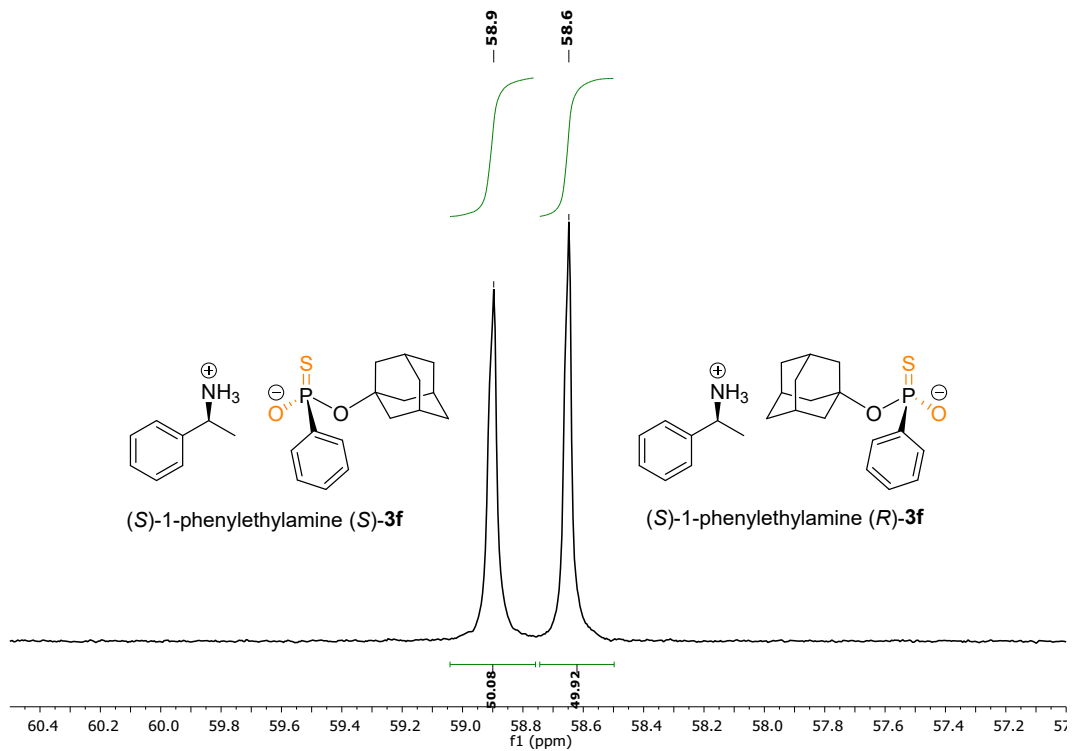

(*S*)-**3f** + (*S*)-phenylethylamine

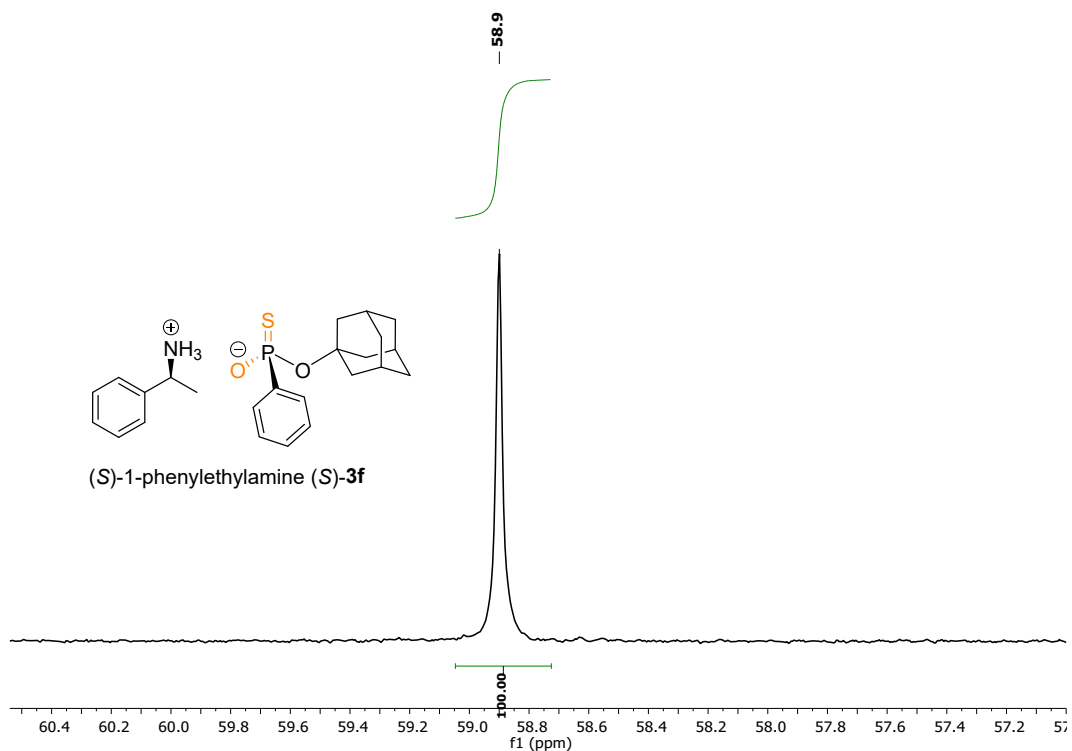



## References:

- 1 V. Ujj, J. Schindler, T. Novák, M. Czugler, E. Fogassy and G. Keglevich, Coordinative Resolution of 1-Phenyl- and 1-Naphthyl-3-Methyl-3-Phospholene 1-Oxides with Calcium Hydrogen O,O'-Dibenzoyl-(2R,3R)-Tartrate or Calcium Hydrogen O,O'-Di-p-Toluyyl-(2R,3R)-Tartrate, *Tetrahedron: Asymmetry*, 2008, **19**, 1973–1977.
- 2 B. Varga and P. Bagi, Preparation of Enantiomerically Enriched P -Stereogenic Dialkyl-Arylphosphine Oxides via Coordination Mediated Optical Resolution, *Symmetry*, 2020, **12**, 215.
- 3 A. K. Beck, B. Bastani, D. A. Plattner, W. Petter, D. Seebach, H. Braunschweiger, P. Gysi and L. Lavecchia, Large-Scale Preparation of Alpha,Alpha,Alpha,Alpha-Tetraaryl-1,3-Dioxolane-4,5-Dimethanols (TADDOL) - Versatile Auxiliaries for EPC Synthesis and Its Solid-State Structure, *Chimia*, 1991, **45**, 238–244.
- 4 B. Varga, P. Szemesi, P. Nagy, R. Herbay, T. Holczbauer, E. Fogassy, G. Keglevich and P. Bagi, Enantioseparation of P-Stereogenic Secondary Phosphine Oxides and Their Stereospecific Transformation to Various Tertiary Phosphine Oxides and a Thiophosphinate, *J. Org. Chem.*, 2021, **86**, 14493–14507.
- 5 S. Legrand, H. Luukinen, R. Isaksson, I. Kilpeläinen, M. Lindström, I. A. Nicholls and C. R. Unelius, Synthesis, NMR Conformational Studies and Host-Guest Behaviour of New (+)-Tartaric Acid Derivatives, *Tetrahedron Asymmetry*, 2005, **16**, 635–640.
- 6 D. Gatineau, D. H. Nguyen, D. Hérault, N. Vanthuyne, J. Leclaire, L. Giordano and G. Buono, H-Adamantylphosphinates as Universal Precursors of P-Stereogenic Compounds, *J. Org. Chem.*, 2015, **80**, 4132–4141.
- 7 R. Beaud, R. J. Phipps and M. J. Gaunt, Enantioselective Cu-Catalyzed Arylation of Secondary Phosphine Oxides with Diaryliodonium Salts toward the Synthesis of P-Chiral Phosphines, *J. Am. Chem. Soc.*, 2016, **138**, 13183–13186.
- 8 W. L. F. Armarego, *Purification of Laboratory Chemicals*, 8th Edition.; Butterworth-Heinemann: Oxford, 2017.
- 9 D. F. Shriver and M. A. Drezdson, *The Manipulation of Air-Sensitive Compounds*, 2nd Edition; Wiley & Sons: New York, 1986.
- 10 Rigaku/MS (2006). CrystalClear and CrystalStructure. Rigaku/MS Inc., The Woodlands, Texas, USA.
- 11 NUMABS: Higashi, T. (1998), rev. 2002. (Rigaku/MS Inc.)
- 12 G. M. Sheldrick, A Short History of SHELX, *Acta Crystallogr. Sect. A Found.*

- Crystallogr.*, 2008, **64**, 112–122.
- 13 G. M. Sheldrick, Crystal Structure Refinement with SHELXL, *Acta Crystallogr. Sect. C Struct. Chem.*, 2015, **71**, 3–8.
  - 14 M. C. Burla, R. Caliandro, B. Carrozzini, G. L. Casciarano, C. Cuocci, C. Giacovazzo, M. Mallamo, A. Mazzone and G. Polidori, Crystal Structure Determination and Refinement via SIR2014, *J. Appl. Crystallogr.*, 2015, **48**, 306–309.
  - 15 A. L. Spek, Structure Validation in Chemical Crystallography, *Acta Crystallogr. Sect. D Biol. Crystallogr.*, 2009, **65**, 148–155.
  - 16 C. F. Macrae, P. R. Edgington, P. McCabe, E. Pidcock, G. P. Shields, R. Taylor, M. Towler and J. van de Streek, Mercury : Visualization and Analysis of Crystal Structures, *J. Appl. Crystallogr.*, 2006, **39**, 453–457.
  - 17 P. van der Sluis and A. L. Spek, BYPASS: An Effective Method for the Refinement of Crystal Structures Containing Disordered Solvent Regions, *Acta Crystallogr. Sect. A Found. Crystallogr.*, 1990, **46**, 194–201.
  - 18 A. I. Kitaigorodsky, *Molecular Crystals and Molecules*, Academic Press, New York, 2012.
  - 19 M. J. Turner, J. J. McKinnon, S. K. Wolff, D. J. Grimwood, P. R. Spackman, D. Jayatilaka, M. A. Spackman, CrystalExplorer17 **2017**. University of Western Australia.
  - 20 M. A. Spackman and D. Jayatilaka, Hirshfeld Surface Analysis, *CrystEngComm*, 2009, **11**, 19–32.
  - 21 S. P. Thomas, P. R. Spackman, D. Jayatilaka and M. A. Spackman, Accurate Lattice Energies for Molecular Crystals from Experimental Crystal Structures, *J. Chem. Theory Comput.*, 2018, **14**, 1614–1623.
  - 22 G. Morales, W. Li, P. F. Jackson, Process for Preparing Enantiomer-Enriched Hydroxyphosphinyl Derivatives. WO1999033848A1, 1998.
  - 23 K. R. Winters, C. Ricke and J. Montchamp, Synthesis of Adamantyl H -Phosphinate Esters, *Eur. J. Org. Chem.* **2021**. <https://doi.org/10.1002/ejoc.202101130>.
  - 24 O. Berger, C. Petit, E. L. Deal and J.-L. Montchamp, Phosphorus-Carbon Bond Formation: Palladium-Catalyzed Cross-Coupling of H -Phosphinates and Other P(O)H-Containing Compounds, *Adv. Synth. Catal.*, 2013, **355**, 1361–1373.
  - 25 D. Gatineau, L. Giordano and G. Buono, Bulky, Optically Active P-Stereogenic Phosphine–Boranes from Pure H-Menthylphosphinates, *J. Am. Chem. Soc.*, 2011, **133**, 10728–10731.
  - 26 E. Jablonkai, R. Henyecz, M. Milen, J. Kóti and G. Keglevich, T3P®-Assisted

- Esterification and Amidation of Phosphinic Acids, *Tetrahedron* 2014, **70**, 8280–8285.
- 27 Y. R. Dumond, R. L. Baker and J.-L. Montchamp, Orthosilicate-Mediated Esterification of Monosubstituted Phosphinic Acids, *Org. Lett.*, 2000, **2**, 3341–3344.
- 28 M. Furegati and S. Nocito, Practical Isolation of the (1 R ,2 R )-Enantiomer from a Racemic Cis/Trans Mixture of 2-Methyl-1-Cyclohexanamine, *Org. Process Res. Dev.*, 2017, **21**, 1822–1827.
- 29 R. A. Sheldon, *Chirotechnology: Industrial Synthesis of Optically Active Compounds*; Marcel Dekker: New York, 1993.
- 30 O. Berger and J.-L. Montchamp, A General Strategy for the Synthesis of P-Stereogenic Compounds, *Angew. Chem. Int. Ed.*, 2013, **52**, 11377–11380.
- 31 K. Dziuba, M. Lubańska and K. M. Pietrusiewicz, Enantiodivergent Synthesis of Both PAMPO Enantiomers Using 1 -Menthyl Chloroacetate and Stereomutation at P in Classical Quaternisation Reactions, *Synthesis*, 2020, **52**, 909–916.
- 32 D. Xu, N. Rivas-Bascón, N. M. Padial, K. W. Knouse, B. Zheng, J. C. Vantourout, M. A. Schmidt, M. D. Eastgate and P. S. Baran, Enantiodivergent Formation of C-P Bonds: Synthesis of P-Chiral Phosphines and Methylphosphonate Oligonucleotides, *J. Am. Chem. Soc.*, 2020, **142**, 5785–5792.
- 33 W. S. Knowles, M. J. Sabacky and B. D. Vineyard,  $\alpha$ -Amino Acids by Asymmetric Hydrogenation, in *Adv. Chem. Ser.*, American Chemical Society, 1974, vol. 132, pp. 274–282.
